# Supplementary material for: Site-specific post-translational modification detection by polar charged engineered MspA nanopores
Source: Royal Society of Chemistry journal article supplement (doi:10.1039/d6sc01451h), 2026-05-13
Supplement: d6sc01451h1.pdf [file d6sc01451h1.pdf]

## Supporting Information

### Site-Specific Post-Translational Modification Detection by Polar Charged Engineered MspA Nanopores

Shijun Lin<sup>a</sup>, Yakun Yi<sup>b</sup>, Yiheng Liu<sup>a</sup>, Minglun Li<sup>c</sup>, Fan Xia<sup>a\*</sup>, Hai-Chen Wu<sup>b\*</sup>, Xiaoding Lou<sup>a\*</sup>

<sup>a</sup> State Key Laboratory of Geomicrobiology and Environmental Changes, Faculty of Materials Science and Chemistry, China University of Geosciences, Wuhan 430074, China.  
louxiaoding@cug.edu.cn; xiafan@cug.edu.cn

<sup>b</sup> Beijing National Laboratory for Molecular Sciences, Key Laboratory of Analytical Chemistry for Living Biosystems, Institute of Chemistry, Chinese Academy of Sciences, Beijing 100190, China.  
haichenwu@iccas.ac.cn

<sup>c</sup> State Key Laboratory of Polymer Science and Technology, Changchun Institute of Applied Chemistry, Chinese Academy of Sciences, Changchun 130022, China

#### Table of Contents

|                                      |    |
|--------------------------------------|----|
| Table of Contents .....              | 2  |
| Experimental Procedures .....        | 5  |
| 1. Materials and reagents .....      | 5  |
| 2. Nanopore preparations.....        | 5  |
| 3. Nanopore measurements .....       | 6  |
| 4. Machine learning.....             | 6  |
| 5. Maldi TOF and HPLC analysis ..... | 6  |
| 6. MD simulations .....              | 7  |
| Results and Discussion .....         | 9  |
| Figure S1.....                       | 9  |
| Figure S2.....                       | 10 |
| Figure S3.....                       | 11 |
| Figure S4.....                       | 12 |
| Figure S5.....                       | 13 |
| Figure S6.....                       | 14 |

|                 |    |
|-----------------|----|
| Figure S7.....  | 15 |
| Figure S8.....  | 16 |
| Figure S9.....  | 17 |
| Figure S10..... | 18 |
| Figure S11..... | 19 |
| Figure S12..... | 20 |
| Figure S13..... | 21 |
| Figure S14..... | 22 |
| Figure S15..... | 23 |
| Figure S16..... | 24 |
| Figure S17..... | 25 |
| Figure S18..... | 26 |
| Figure S19..... | 27 |
| Figure S20..... | 28 |
| Figure S21..... | 29 |
| Figure S22..... | 30 |
| Figure S23..... | 31 |
| Figure S24..... | 32 |
| Figure S25..... | 33 |
| Figure S26..... | 34 |
| Figure S27..... | 35 |
| Figure S28..... | 36 |
| Figure S29..... | 37 |
| Figure S30..... | 38 |
| Figure S31..... | 39 |
| Figure S32..... | 40 |
| Figure S33..... | 41 |
| Figure S34..... | 42 |
| Figure S35..... | 43 |
| Figure S36..... | 44 |
| Figure S37..... | 45 |
| Figure S38..... | 46 |
| Figure S39..... | 47 |
| Figure S40..... | 48 |
| Figure S41..... | 49 |
| Figure S42..... | 50 |
| Figure S43..... | 51 |
| Figure S44..... | 52 |
| Figure S45..... | 53 |
| Figure S46..... | 54 |
| Figure S47..... | 55 |
| Figure S48..... | 56 |
| Figure S49..... | 57 |
| Figure S50..... | 58 |

|                           |    |
|---------------------------|----|
| Figure S51 .....          | 59 |
| Figure S52 .....          | 60 |
| Supplemental Tables ..... | 61 |
| Table S1 .....            | 61 |
| Table S2 .....            | 62 |
| Table S3 .....            | 63 |
| Table S4 .....            | 64 |
| Table S5 .....            | 65 |
| Table S6 .....            | 66 |
| Table S7 .....            | 67 |
| Table S8 .....            | 68 |
| Table S9 .....            | 69 |
| Supplemental Data .....   | 70 |
| Figure S53 .....          | 70 |
| Figure S54 .....          | 71 |
| Figure S55 .....          | 72 |
| Figure S56 .....          | 73 |
| Figure S57 .....          | 74 |
| Figure S58 .....          | 75 |
| Figure S59 .....          | 76 |
| Figure S60 .....          | 77 |
| Figure S61 .....          | 78 |
| Figure S62 .....          | 79 |
| Figure S63 .....          | 80 |
| Figure S64 .....          | 81 |
| Figure S65 .....          | 82 |
| Figure S66 .....          | 83 |
| Figure S67 .....          | 84 |
| Figure S68 .....          | 85 |
| Figure S69 .....          | 86 |
| Figure S70 .....          | 87 |
| Figure S71 .....          | 88 |
| Figure S72 .....          | 89 |
| Figure S73 .....          | 90 |
| Figure S74 .....          | 91 |
| Figure S75 .....          | 92 |
| Figure S76 .....          | 93 |
| Figure S77 .....          | 94 |
| Figure S78 .....          | 95 |
| References .....          | 96 |

## Experimental Procedures

## 1. Materials and reagents

1,2-diphytanoyl-sn-glycero-3-phosphocholine (DPhPC) was supplied by Avanti Polar Lipids. E. ColiBL21(DE3) were purchased from Sangon Biotech. Guanidine hydrochloride and agarose were purchased from Biofoxx. Urea, ethylenediaminetetraacetic acid (EDTA), sodium acetate, disodium hydrogen phosphate ( $\text{Na}_2\text{HPO}_4$ ), sodium dihydrogen phosphate ( $\text{NaH}_2\text{PO}_4$ ), hydrochloric acid (HCl), sodium chloride (NaCl) and sodium hydroxide (NaOH) were purchased from Sinopharm (China). Imidazole, nickel sulfate, isopropyl- $\beta$ -D-thiogalactopyranoside (IPTG) and Genapol X-80 were purchased from Aladdin (China). Yeast extract, tryptone, 4-(2-hydroxyethyl)-1-piperazine ethanesulfonic acid (HEPES) were purchased from Shanghai Yuanye Bio-Technology (China). Peptides were purchased from Nanjing Yuanpeptide Biotechnology Co., Ltd, QYAOBIO (ChinaPeptides Co., Ltd.) and GL Biochem (Shanghai) Ltd. All the mass spectrometry of the peptides was shown in FigureS53-S78. The MspA nanopore with different mutations at site 91 were constructed and purified according to reference 1.

## 2. Nanopore preparations

All engineered MspA were generated based on the WT MspA sequence, and the specific mutation sites are shown in Table S1. The WT MspA sequence is as follows:

```
MGLDNELSLVDGQDRTLTVQQWDTFLNGVFLDRNRLTREWFHSGRAKYIVAGPGADEFEGTLELGYQIGFP  
WSLGVGINFSYTTPNILINNGNITAPPFGLNSVITPNLFPGVVISARLGNPGIQEVATFSVRVSGAKGGVAVSN  
AHGTVTGAAGGVLLRPFARLIASGTGDSVTTYGEPWNMNHSHHHHH*
```

The amino acid at the narrowest restriction of an octameric MspA nanopore was engineered. The gene coding for M2 MspA, MspA-Q, MspA-D, MspA-E, MspA-H, MspA-R, MspA-K, MspA-F and MspA-W were custom synthesized and constructed in a pet 30a(+) plasmid (Genscript, New Jersey) respectively. Briefly, the Q, D, E, H, R, K, F, and W character in the name of each gene stands for the glutamine, aspartic acid, glutamic acid, histidine, arginine, lysine, phenylalanine and tryptophan at 91 site. The constructed plasmid gene was heat-shock transformed into E. ColiBL21(DE3). Then, the cells were grown in LB medium(contain 50  $\mu\text{g}/\text{ml}$  Kanamycin) at 37°C and 225 rpm until the optical density at 600 nm ( $\text{OD}_{600}$ ) reach 0.7. After cooling the medium to 16°C, IPTG with a final concentration of 1 mM was added to induce protein expression, and the culture

was shaken at 225 rpm overnight. Afterwards, the cells were harvested by centrifugation (6000 rpm, 10 min, 4 °C).

The bacterial pellet was resuspended in a 100 mL lysis buffer (100 mM Na<sub>2</sub>HPO<sub>4</sub>/NaH<sub>2</sub>PO<sub>4</sub>, 0.1 mM EDTA, 150 mM NaCl, 0.5% (w/v) Genapol X-80, pH=6.5) and heated at 60 °C for 10 min. The suspension was cooled on ice for 10 min and centrifuged at 4 °C for 30 min at 12000 rpm. Then, the protein mixture was purified using nickel affinity chromatography and eluted with a linear gradient of imidazole (5 mM-500 mM) by mixing buffer A (0.5 M NaCl, 20 mM HEPES, 5 mM imidazole, 0.5% (w/v) Genapol X-80, pH=8.0) with buffer B (0.5 M NaCl, 20 mM HEPES, 500 mM imidazole, 2 mM TCEP, 0.5% (w/v) Genapol X-80, pH=8.0). The eluted fractions were further characterized by 4-20% SDS-PAGE gel to identify the octameric MspA. Subsequently, the protein solution was subjected to multiple rounds of dilution and ultrafiltration using ultrafiltration centrifugal units with a molecular weight cutoff of 50 kDa to reduce the imidazole concentration in the protein buffer. Then, the proteins were stored at -80 °C for long term storage.

### **3. Nanopore measurements**

Nanopore recordings were performed using the Orbit16 device (Nanon Technologies, Munich, Germany) and MECA16 microelectrode cavity arrays (Ionera Technologies, Freiburg, Germany) as previously detailed. The self-assembled lipid bilayer was formed with DPhPC (5 mg/mL, dissolved in octane). The measurement buffer was prepared with 1 M NaCl, 10 mM HEPES at pH=7.4. During the experimental process, 200 µL of measurement buffer was added to the MECA16 microelectrode cavity array. A magnetic stir bar was used to uniformly coat DPhPC onto the microcavities. Current detection was performed to validate the chip's conductivity and confirm the formation of the lipid bilayer. Subsequently, 1 µL of MspA nanopore solution was titrated onto the top of the microcavities, and insertion of a single nanopore was awaited. Upon insertion, excess nanopores were removed by exchanging the buffer in the compartment.

All electrophysiology measurements were performed with a continuously applied +50 mV potential. All experiments were conducted at room temperature (25 ± 2 °C). Except for the glycosylated peptide, which was used at a concentration of 50 µM, all other peptides were used at a concentration of 5 µM. The ionic current through a single nanopore was acquired with a 10 kHz sampling rate and low-pass filtered with a 1 kHz corner frequency. To accurately resolve fast

kinetics, higher sampling bandwidth and more optimized filtering settings can also be employed. All channel binding events were detected by performing “single-channel search” using Clampfit 10.6 (Molecular Devices) and further analyzed (histogram generation, curve fitting and plotting) using Origin2021.

#### **4. Machine learning**

To differentiate distinct post-translational modification (PTM) groups based on extracted features, MATLAB’s built-in Classification Learner application was utilized. The preprocessed feature data (eg. relative residual current, dwell time, standard deviation, and instantaneous frequency of the signal), formatted as a table with each row representing a sample and each column corresponding to a specific feature, were imported into MATLAB, where classification labels representing different experimental groups were assigned as the response variable. Multiple classification models were systematically evaluated using a 10-fold cross-validation strategy to ensure robust model assessment. The optimal model was selected based on classification accuracy and generalization performance on unseen data, prioritizing the classifier with the highest predictive reliability.

#### **5. MalDI TOF and HPLC analysis**

The MspA were heated at 100°C for 10 min to generate protein monomers. The desalted sample was analyzed and quantified (detection range: 10,000–30,000 Da) prior to MalDI TOF analysis. Prior to injection into the mass analyzer, the desalted samples were separated through an ultraperformance liquid chromatography system employing a YMC C4 column with H<sub>2</sub>O/0.1% formic acid as mobile (phase A), followed by gradient elution using acetonitrile/0.1% formic acid (phase B) at a flow rate of 0.5 mL/min.

#### **6. MD simulations**

All molecular dynamics (MD) simulations were performed using the Gromacs package<sup>2</sup>. The system consists of peptides (HY, HY-1p, HY-2p, and HY-3p), the protein nanopore (MspA)<sup>3</sup>, DPhPC phospholipids, water, and ions. The peptide HY was constructed by Discovery Studio (BIOVIA,

Dassault Systèmes), and the phosphorylation modifications of Tyrosine on HY-1p, HY-2p, and HY-3p were achieved by CHARMM-GUI<sup>4</sup>. Wild-type (WT) MspA was obtained from Protein Data Bank (PDB) with the entry ID: 1UUN<sup>5</sup>. Both the MspA-K mutant (D90N/D91K/D93N/R96A/D118R/D134R/E139K) and the DPhPC structure were constructed from the WT MspA utilizing CHARMM-GUI<sup>6</sup>. A detailed description of the mutation protocol can be found in our earlier publications. [J. Chem. Phys. 160, 084905 (2024)] The components were placed in box with initial dimensions of 10.01383×10.01383×12.50000 nm<sup>3</sup>. The salt (NaCl) concentrations are 1M in all simulations. To investigate the impact of phosphorylation modifications on the translocation behavior of peptides, two initial configurations for the peptide chains were chosen: one placing Y2 on the peptide near the N91K of MspA and the other placing Y8@Y10 near N91K. The CHARMM36 force field was applied for the system<sup>7</sup>, with the TIP3P model<sup>8</sup>. Electrostatic interactions are evaluated using a particle-mesh Ewald sum, with a real-space cutoff of 1.2 nm. Van der Waals interactions were evaluated using a smooth 1.0-1.2 nm cutoff. Langevin dynamics were used to maintain the temperature at 300.15 K.

During the whole simulation process, each carbon atom of the MspA protein was harmonically restrained ( $k_{\text{SPRING}} = 1 \text{ kcal mol}^{-1} \text{ nm}^{-2}$ ) to its initial coordinate. Each translocation system was minimized in 2,000 steps using the conjugate gradient method and then equilibrated for 45 ns at a constant number of atoms, pressure, and temperature (NPT) ensemble performed while keeping the ratio of the systems size along the plane of the bilayer constant. The systems were then simulated for 50 ns in a constant number of particles, volume and temperature (NVT) ensemble. Both the timesteps for NPT and NVT above are 0.001 ps. The systems were then simulated another 300 ns in NVT ensemble under a constant electric field  $E = -V/L_z$  applied along the z-axis (normal to the membrane) to produce a transmembrane bias  $V = 50 \text{ mV}$ ; where  $L_z$  is the dimension of the simulated system in the direction of the applied electric field. For the second NVT ensemble the time step is 0.002 ps, the data in the last 100 ns were used for analysis. Each simulation case was repeated three times with different seeds. The MD simulation results were analyzed using tools from the GROMACS 2022.6 package, MDAnalysis<sup>9</sup>, gmxMMPBSA<sup>10</sup>, Pymol, and ChimeraX 1.9<sup>11</sup>. Instantaneous ionic current was followed by the studies from Aleksei Aksimentiev's group<sup>12</sup> where  $[z_j(t + \Delta t) - z_i(t)]$  is the displacement of ion  $j$  along the  $z$  direction during the time interval  $\Delta t =$

50 ps and  $q_j$  is the charge of ion  $j$ . To minimize thermal noise, the current was calculated within an  $l_z = 20 \text{ \AA}$  thick slab centered at the nanopore constriction, spanning the entire simulation system in the  $x$ - $y$  plane. The instantaneous ionic current values were recorded along with the center of mass of the amino acid substitution's backbone. For each substitution, the data from all trajectories were sorted by the  $z$ -coordinate of the substitution in ascending order.

$$I(t) = \frac{1}{\Delta t l_z} \sum_{z_j=1}^N q_j [z_j(t + \Delta t) - z_j(t)]$$

The Molecular docking calculations were performed to validate the interaction patterns between the sensing region (site N91K) and the peptides PD, PD-cr, and PD-p. The structural files for docking were prepared using AutoDock Tools 1.5.7. Molecular docking simulations were conducted with AutoDock Vina, employing a cubic search box (edge length:  $30 \text{ \AA}$ ) and a grid spacing of  $0.375 \text{ \AA}$ . The maximum number of binding modes was set to 100, and conformational sampling was executed via a genetic algorithm. The resulting poses were ranked by docking scores, followed by structural validation to select the most energetically and sterically favorable conformation.

## Results and Discussion

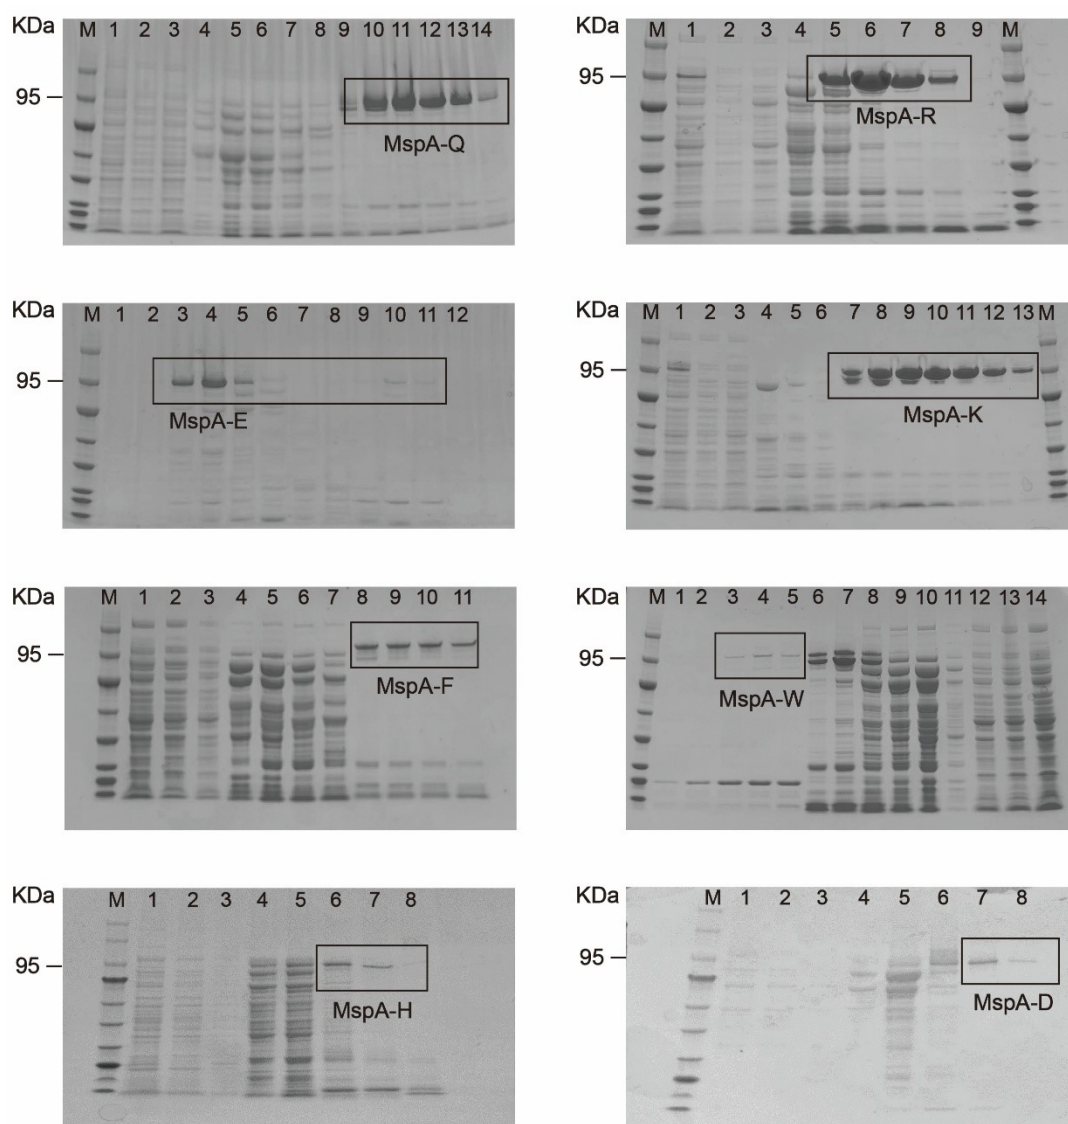

**Figure S1.** The preparation of MspA mutant nanopores. SDS-polyacrylamide gel electrophoresis (4-20% gradient gel) of fractions collected during MspA purification. Gel electrophoresis was continuously run for 50 min with a +140 V applied potential. Lane M: MCE 3-Color Prestained Protein Marker (10-190 kDa). Other lanes: the eluent of the bacterial lysate after column loading.

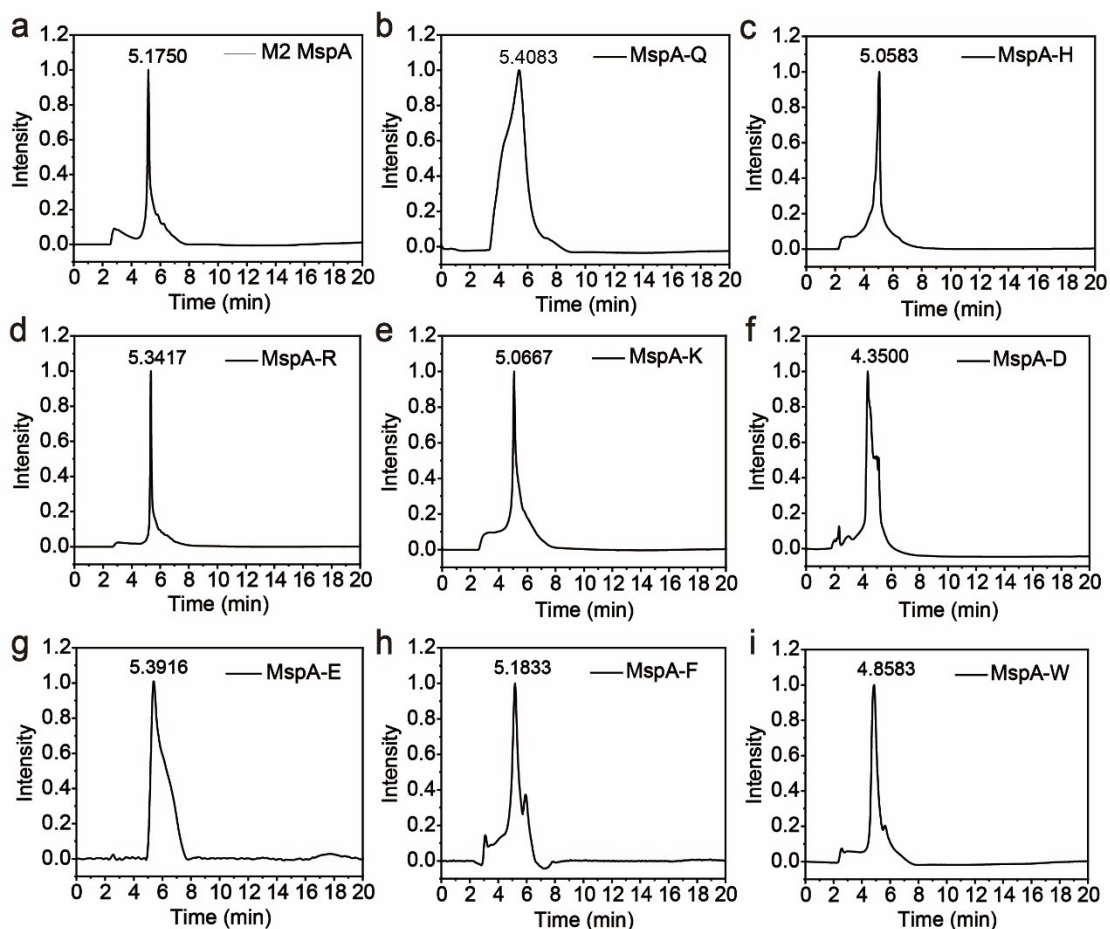

**Figure S2.** HPLC analysis of MSPA mutants. (a) The elution peak of M2 MspA at a retention time of 5.18 min. (b) The elution peak of MspA-Q at a retention time of 5.41 min. (c) The elution peak of MspA-H at a retention time of 5.06 min. (d) The elution peak of MspA-R at a retention time of 5.34 min. (e) The elution peak of MspA-K at a retention time of 5.07 min. (f) The elution peak of MspA-D at a retention time of 4.35 min. (g) The elution peak of MspA-E at a retention time of 5.39 min. (h) The elution peak of MspA-F at a retention time of 5.18 min. (i) The elution peak of MspA-Q at a retention time of 4.86 min. The mobile phase is water/acetonitrile.

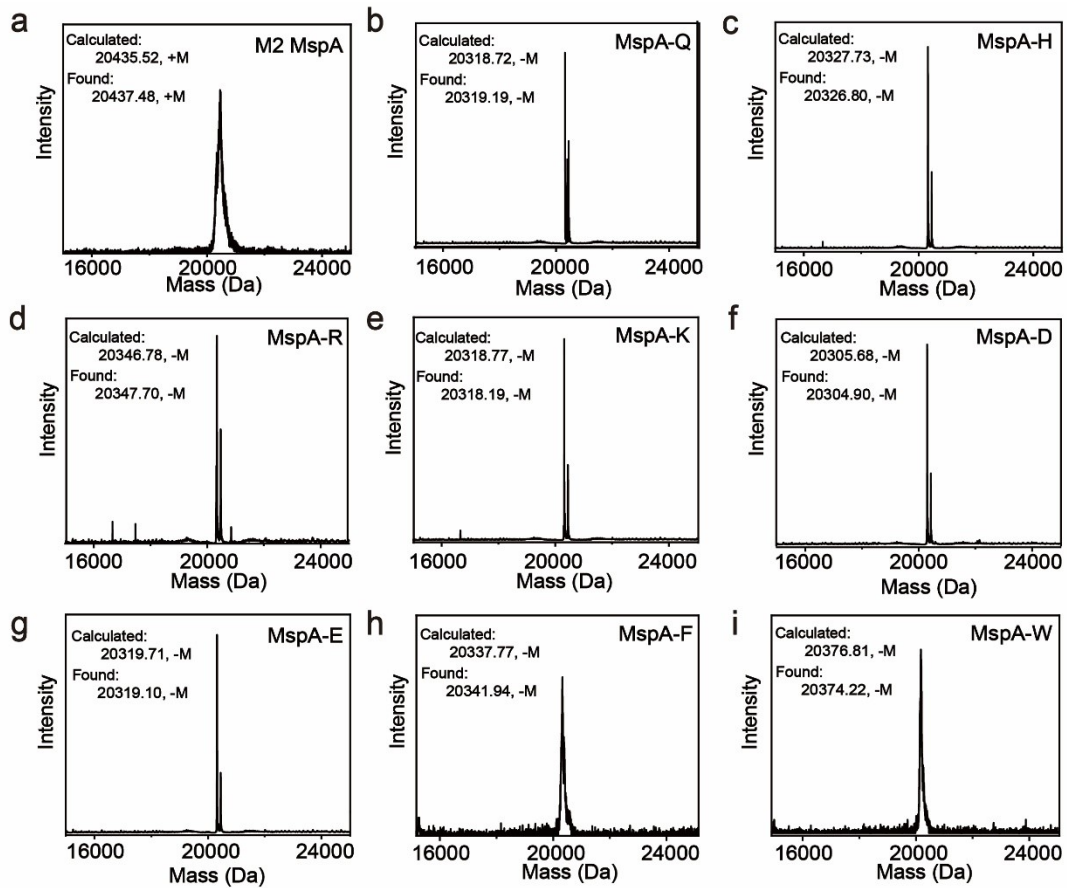

**Figure S3.** MALDI-TOF analysis of MspA mutants. (a) M2 MspA. Calculated: 20435.52 Da, +M. Found: 20437.48 Da, +M. (b) MspA-Q. Calculated: 20318.72 Da, -M. Found: 20319.19 Da, -M. (c) MspA-H. Calculated: 20327.73 Da, -M. Found: 20326.80 Da, -M. (d) MspA-R. Calculated: 20346.78 Da, -M. Found: 20347.70 Da, -M. (e) MspA-K. Calculated: 20318.77 Da, -M. Found: 20318.19 Da, -M. (f) MspA-D. Calculated: 20305.68 Da, -M. Found: 20304.90 Da, -M. (g) MspA-E. Calculated: 20319.71 Da, -M. Found: 20319.10 Da, -M. (h) MspA-F. Calculated: 20337.77 Da, -M. Found: 20341.94 Da, -M. (i) MspA-W. Calculated: 20376.81 Da, -M. Found: 20374.22 Da, -M. The "+M" and "-M" indicate the mass of the protein monomer with or without the initiating methionine.

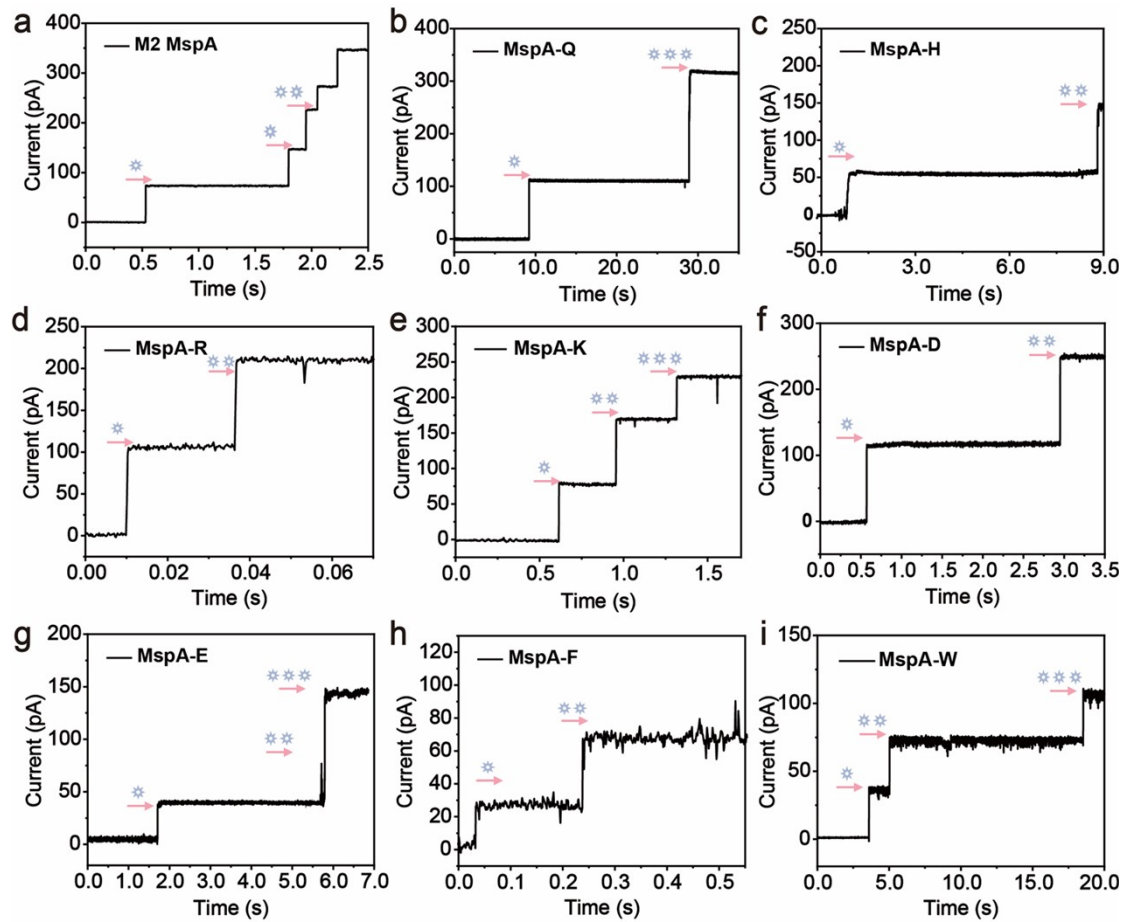

**Figure S4.** Successive insertions of MspA mutants (a: M2 MspA; b: MspA-Q; c: MspA-H; d: MspA-R; e: MspA-K; f: MspA-D; g: MspA-E; h: MspA-F; i: MspA-W) observed during current recording. Each current step corresponds to the sequential insertion of a nanopore into the lipid bilayer. Measurements were performed under a constant +50 mV applied voltage (1.0 M NaCl, 10.0 mM HEPES, pH 7.4).

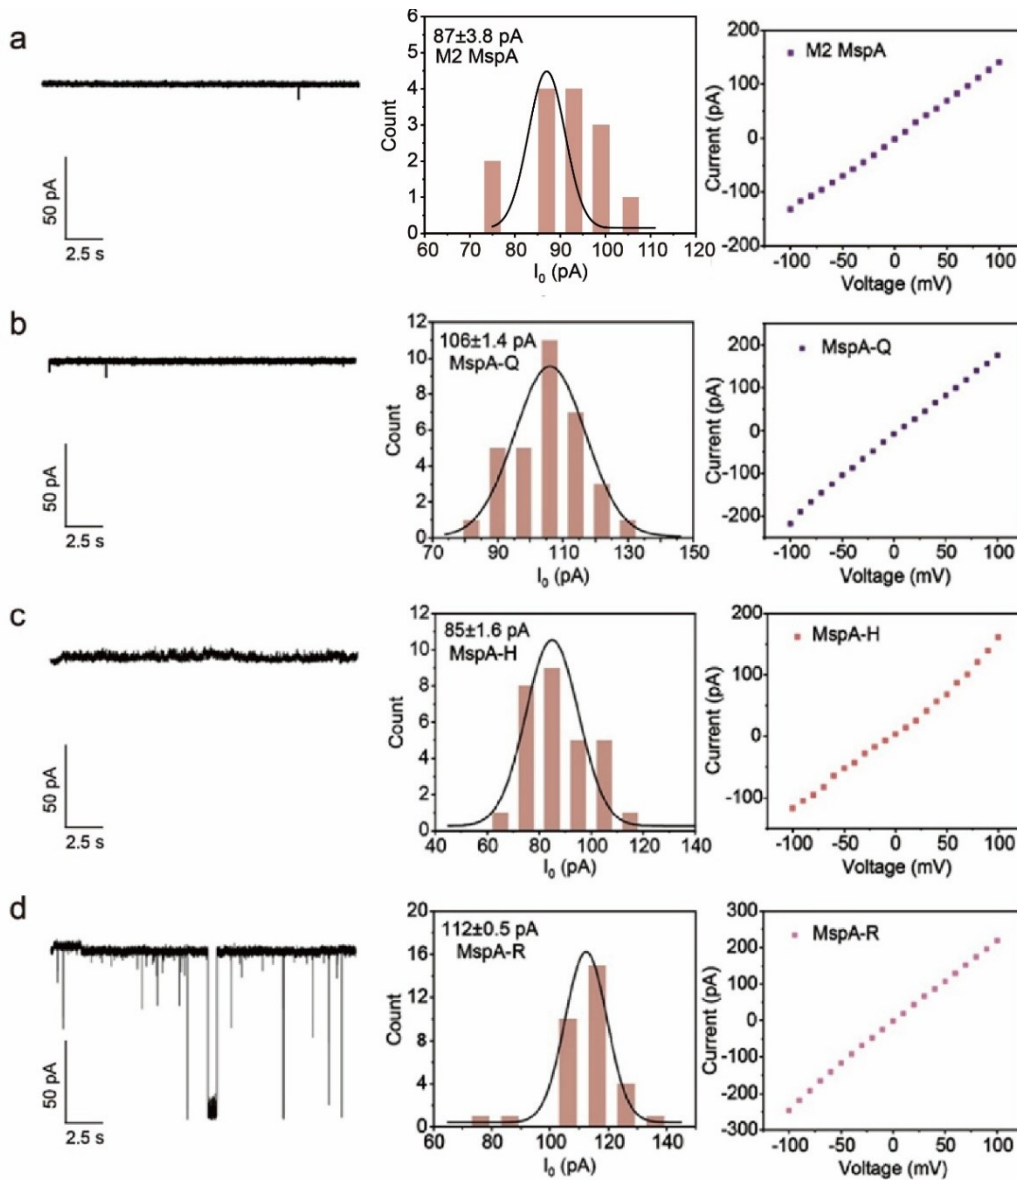

**Figure S5.** Representative current traces (Left), histogram of the open nanopore ( $I_o$ ) (Middle) and I-V curves (Right) of the MspA nanopore (a: M2 MspA; b: MspA-Q; c: MspA-H; d: MspA-R). Representative current traces recorded and histogram of the open current at an applied potential of +50 mV. I-V curves measured by stepping the voltage from -100 mV to +100 mV. Owing to the pronounced baseline noise issue, MspA-R was excluded from further testing. The nanopore measurements were performed in the buffer of 1.0 M NaCl, 10.0 mM HEPES, pH 7.4.

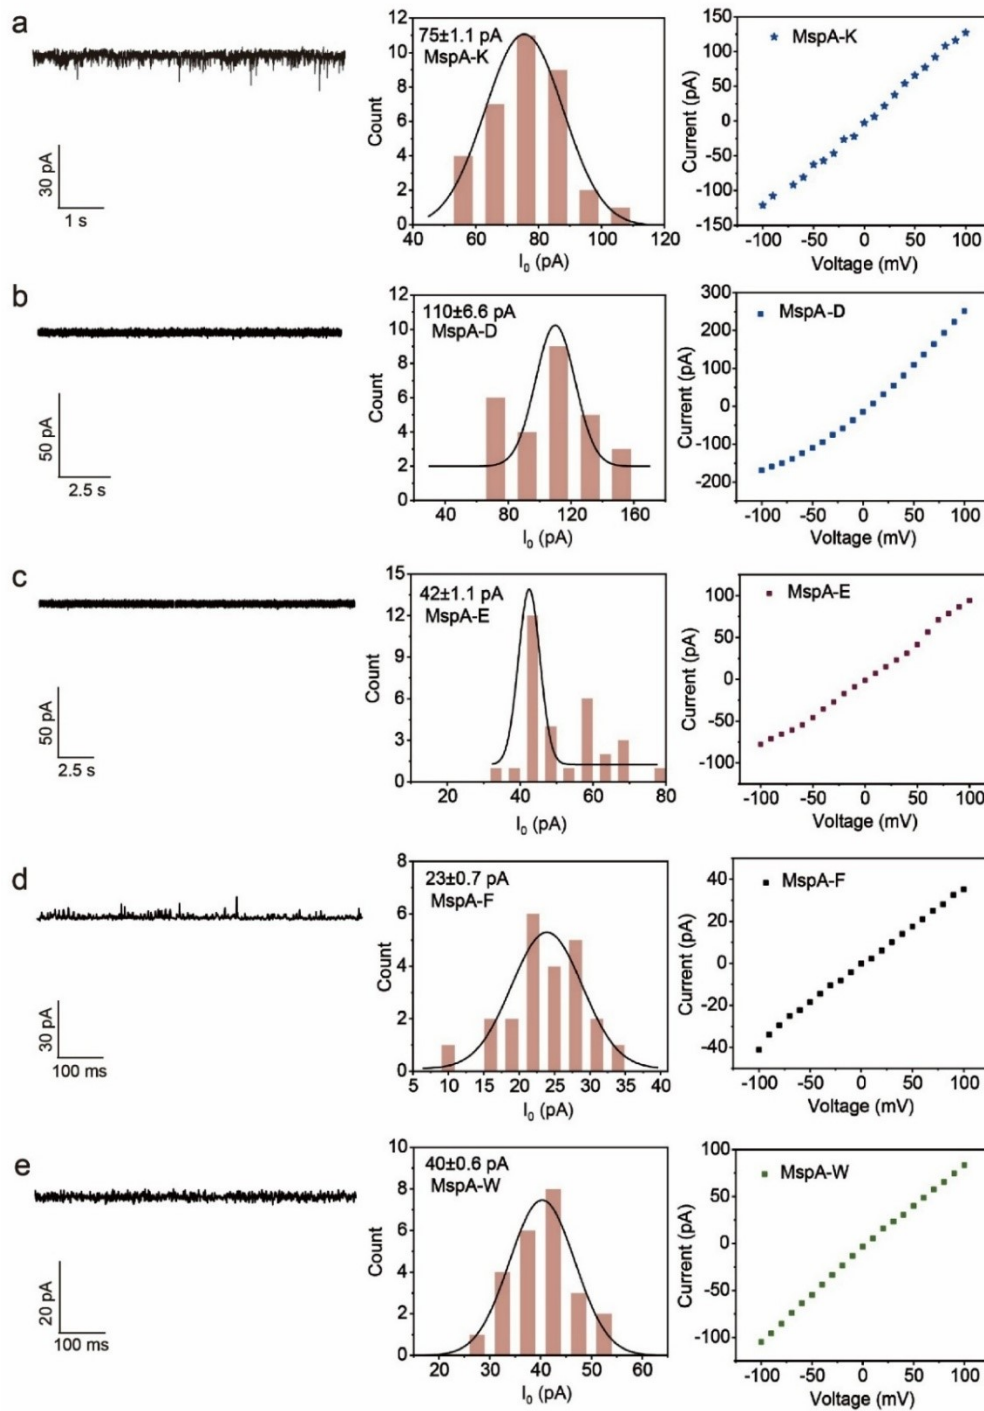

**Figure S6.** Representative current traces (Left), histogram of the open nanopore ( $I_o$ ) (Middle) and I-V curves (Right) of the MspA nanopore (a: MspA-K; b: MspA-D; c: MspA-E; d: MspA-F; e: MspA-W). Representative current traces recorded and histogram of the open current at an applied potential of +50 mV. I-V curves measured by stepping the voltage from -100 mV to +100 mV. Owing to the pronounced baseline noise issue, MspA-R was excluded from further testing. The nanopore measurements were performed in the buffer of 1.0 M NaCl, 10.0 mM HEPES, pH 7.4.

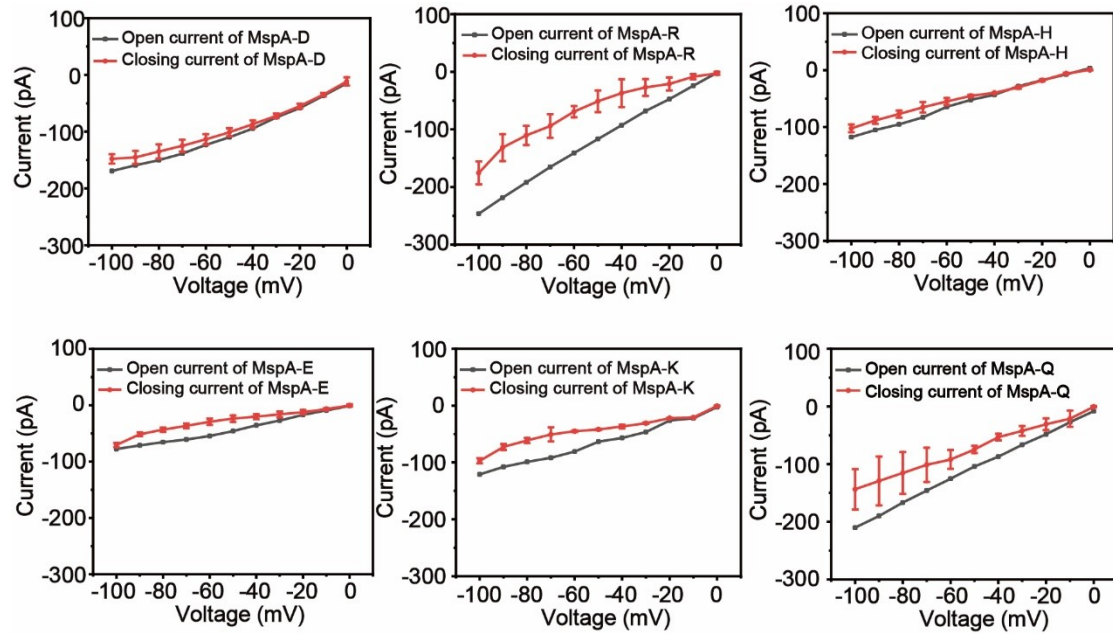

**Figure S7.** Gating behavior of MspA mutants under negative voltage. The nanopore measurements were performed in the buffer of 1.0 M NaCl, 10.0 mM HEPES, pH 7.4.

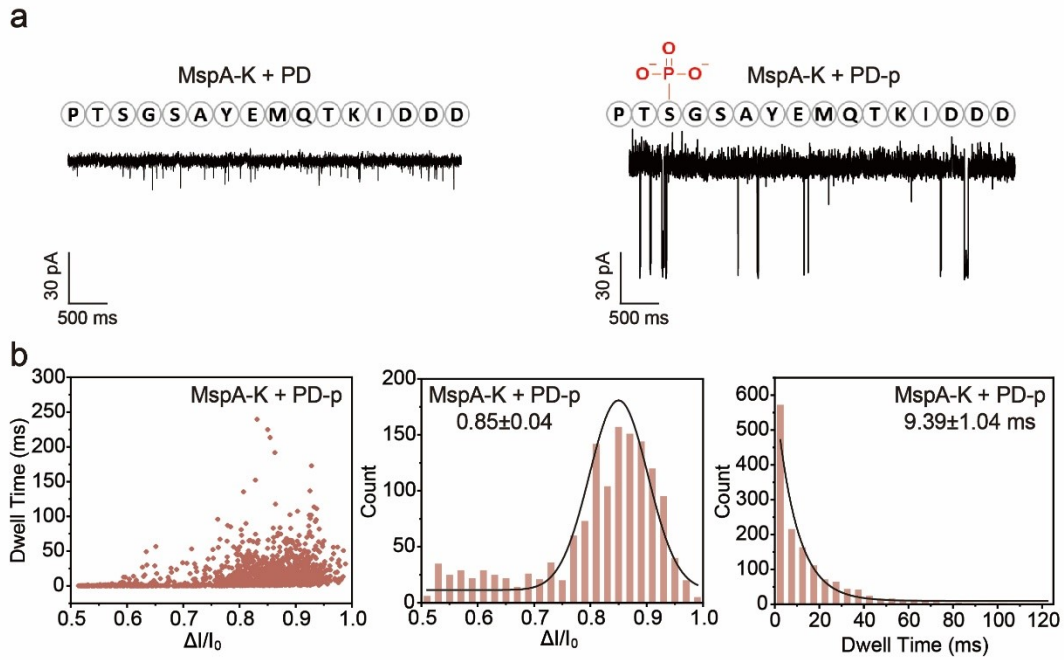

**Figure S8.** (a) Representative current traces of PD and PD-p with MspA-K. The measurements were carried out in the buffer of 1.0 M NaCl, 10.0 mM HEPES, pH 7.4. All peptides were added to a final concentration of 5.0  $\mu$ M. (b) Scatter plot (left) and histogram of  $\Delta I/I_0$  (middle), and dwell time histogram (right) for PD-p interactions with MspA-K at an applied potential of +50 mV.

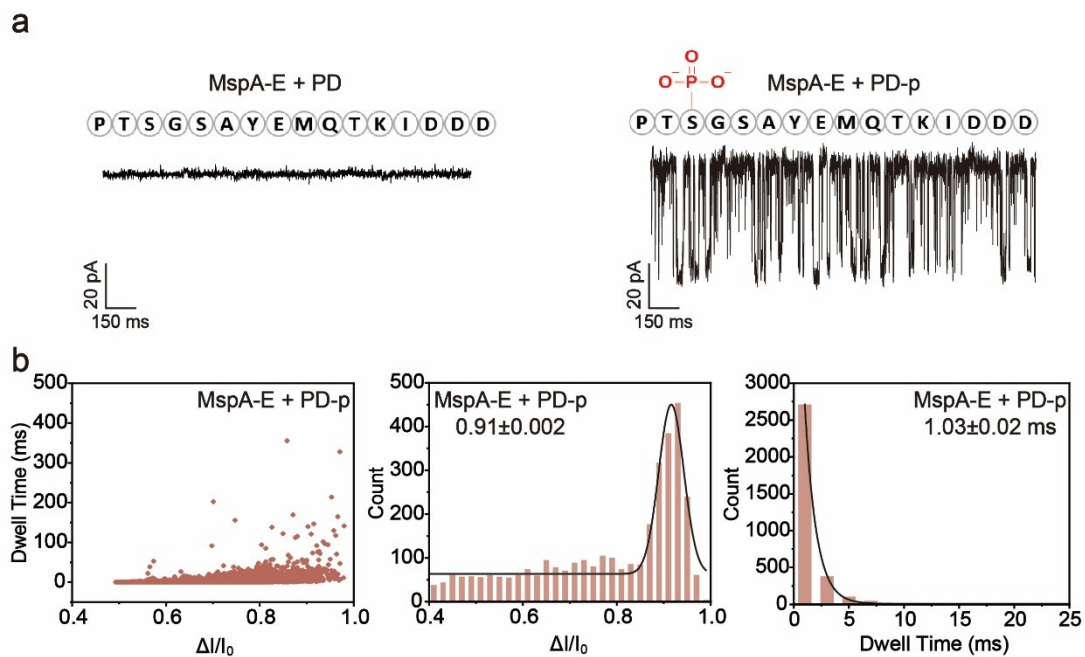

**Figure S9.** (a) Representative current traces of PD and PD-p with MspA-E. The measurements were carried out in the buffer of 1.0 M NaCl, 10.0 mM HEPES, pH 7.4. All peptides were added to a final concentration of 5.0  $\mu$ M. (b) Scatter plot (left) and histogram of  $\Delta I/I_0$  (middle), and dwell time histogram (right) for PD-p interactions with MspA-E at an applied potential of +50 mV.

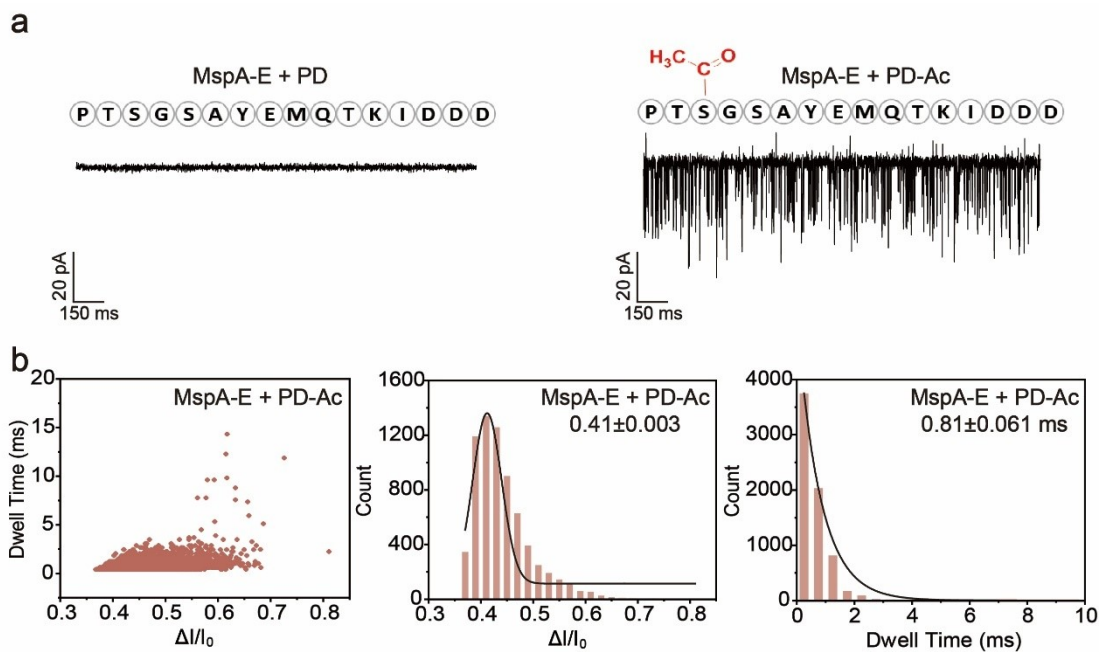

**Figure S10.** (a) Representative current traces of PD and PD-Ac with MspA-E. The measurements were carried out in the buffer of 1.0 M NaCl, 10.0 mM HEPES, pH 7.4. All peptides were added with a final concentration of 5  $\mu$ M for each analyte. (b) Scatter plot (left) and histogram of  $\Delta I/I_0$  (middle), and dwell time histogram (right) for PD-Ac interactions with MspA-E at an applied potential of +50 mV.

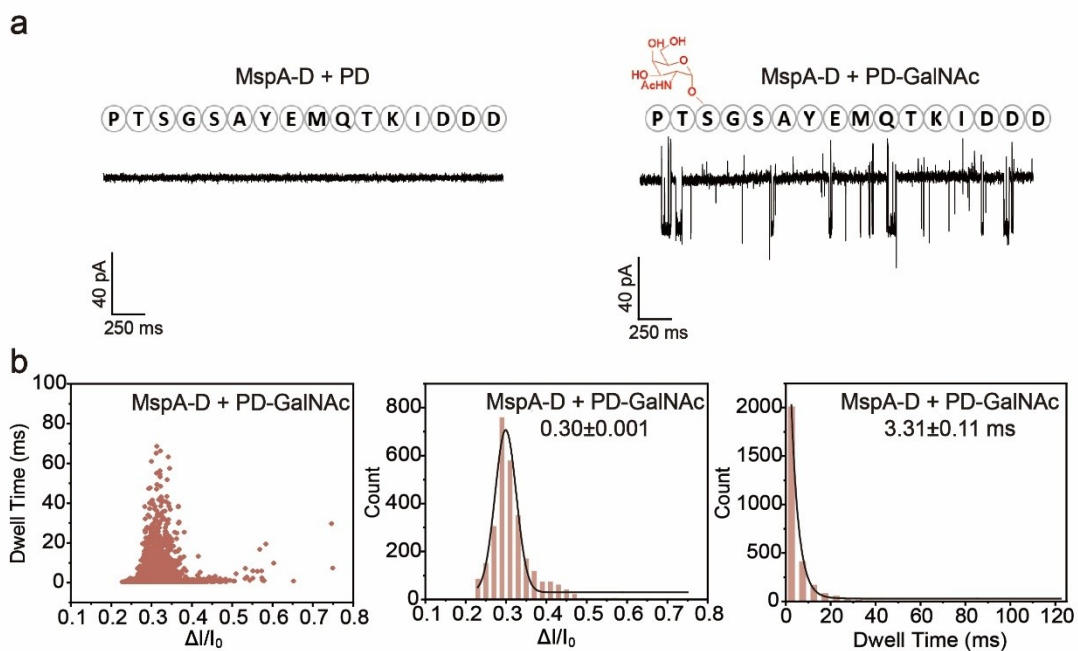

**Figure S11.** (a) Representative current traces of PD and PD-GalNAc with MspA-D. The measurements were carried out in the buffer of 1.0 M NaCl, 10.0 mM HEPES, pH 7.4. All peptides were added with a final concentration of 50.0  $\mu$ M for each analyte. (b) Scatter plot (left) and histogram of  $\Delta I/I_0$  (middle), and dwell time histogram (right) for PD-GalNAc interactions with MspA-D at an applied potential of +50 mV.

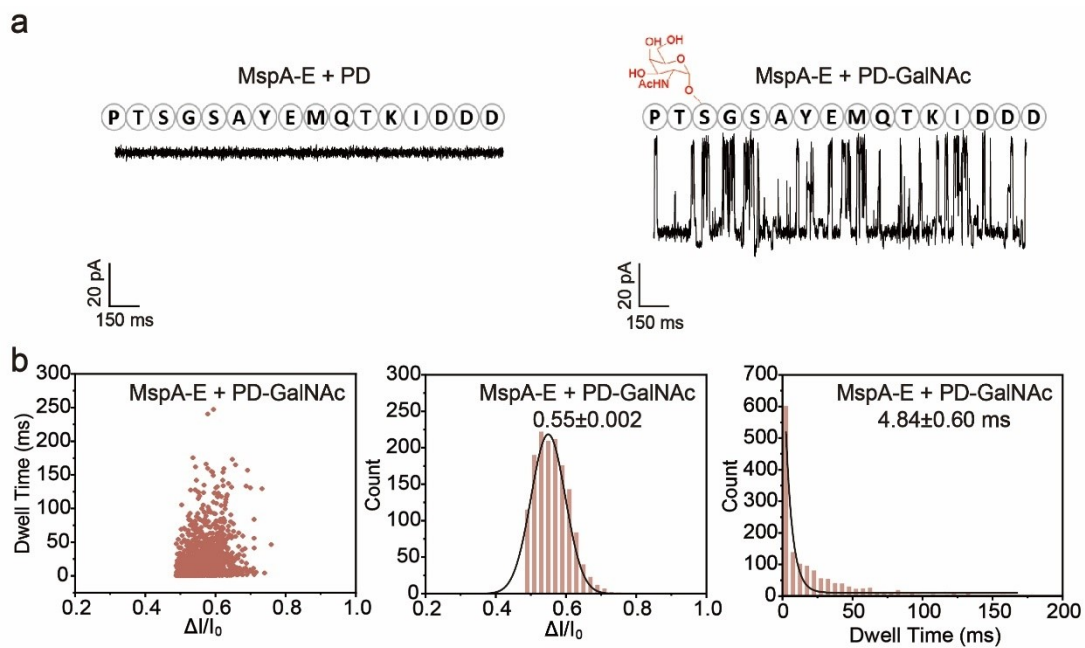

**Figure S12.** (a) Representative current traces of PD and PD-GalNac with MspA-E. The measurements were carried out in the buffer of 1.0 M NaCl, 10.0 mM HEPES, pH 7.4. All peptides were added with a final concentration of 50.0  $\mu$ M for each analyte. (b) Scatter plot (left) and histogram of  $\Delta I/I_0$  (middle), and dwell time histogram (right) for PD-GalNac interactions with MspA-E at an applied potential of +50 mV.

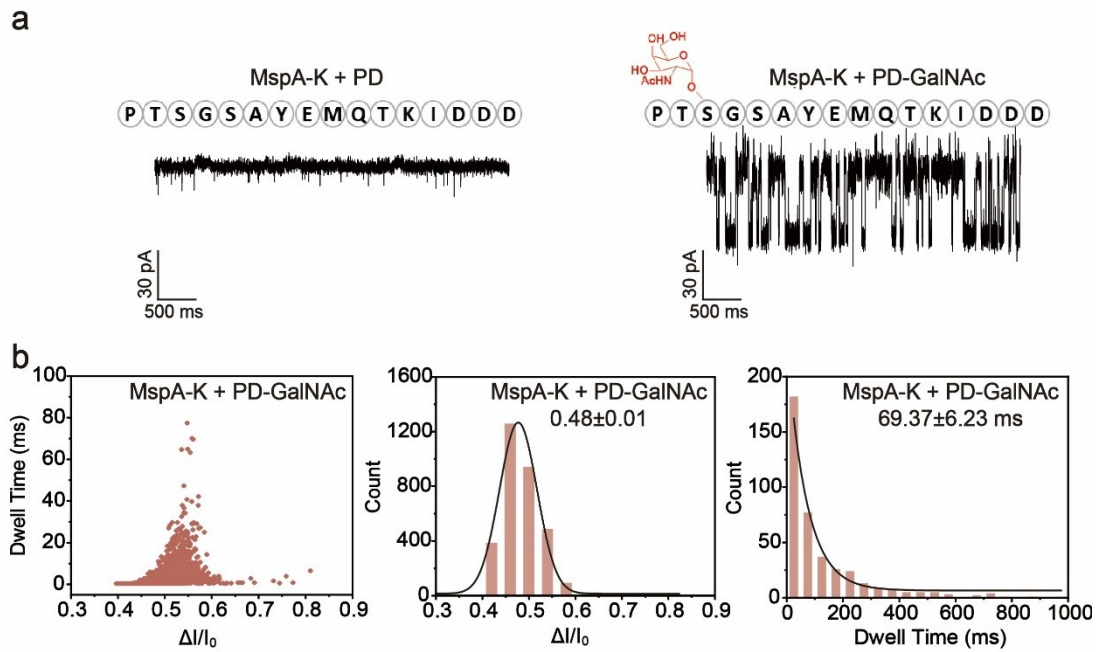

**Figure S13.** (a) Representative current traces of PD and PD-GalNAc with MspA-K. The measurements were carried out in the buffer of 1.0 M NaCl, 10.0 mM HEPES, pH 7.4. All peptides were added with a final concentration of 50  $\mu$ M for each analyte. (b) Scatter plot (left) and histogram of  $\Delta I/I_0$  (middle), and dwell time histogram (right) for PD-GalNAc interactions with MspA-K at an applied potential of +50 mV.

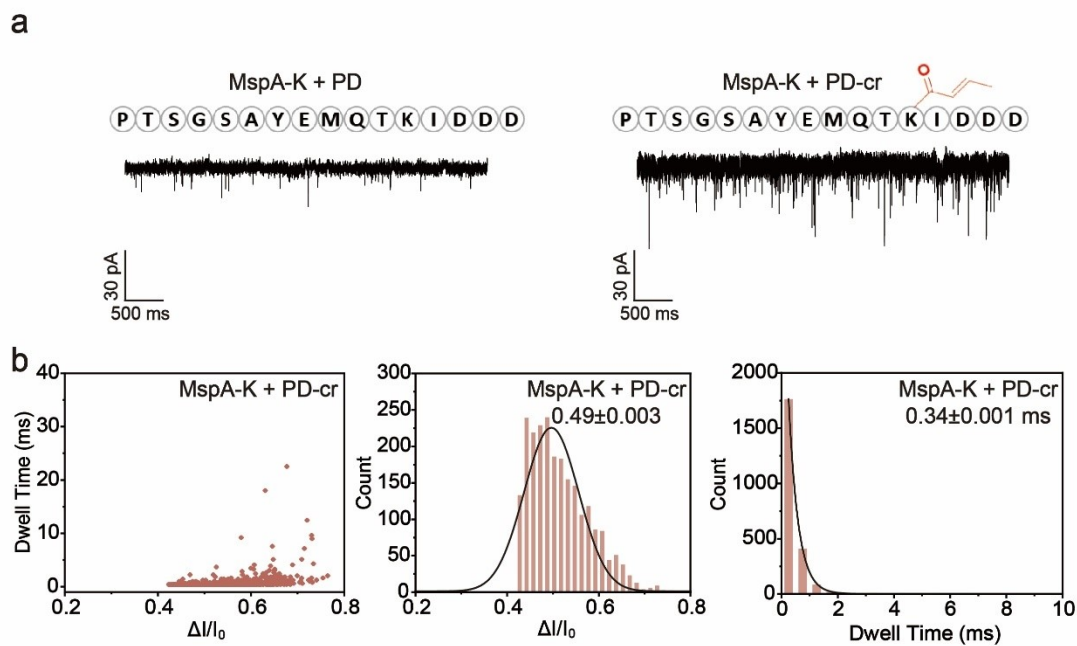

**Figure S14.** (a) Representative current traces of PD and PD-cr with MspA-K. The measurements were carried out in the buffer of 1.0 M NaCl, 10.0 mM HEPES, pH 7.4. All peptides were added with a final concentration of 5  $\mu$ M for each analyte. (b) Scatter plot (left) and histogram of  $\Delta I/I_0$  (middle), and dwell time histogram (right) for PD-cr interactions with MspA-K at an applied potential of +50 mV.

a

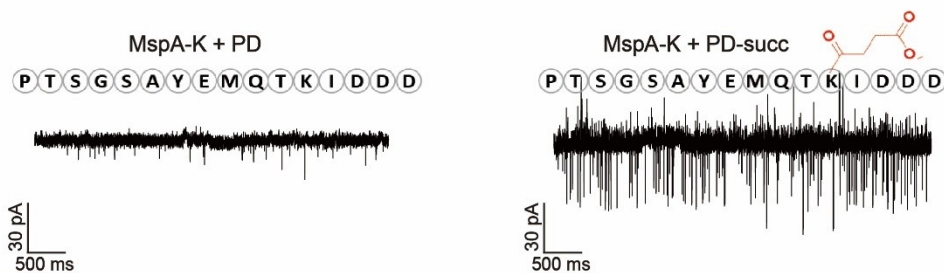

b

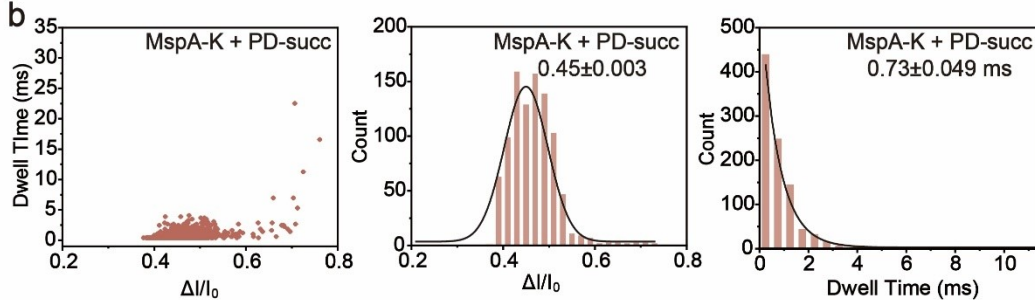

**Figure S15.** (a) Representative current traces of PD and PD-succ with MspA-K. The measurements were carried out in the buffer of 1.0 M NaCl, 10.0 mM HEPES, pH 7.4. All peptides were added with a final concentration of 5  $\mu$ M for each analyte. (b) Scatter plot (left) and histogram of  $\Delta I/I_0$  (middle), and dwell time histogram (right) for PD-succ interactions with MspA-K at an applied potential of +50 mV.

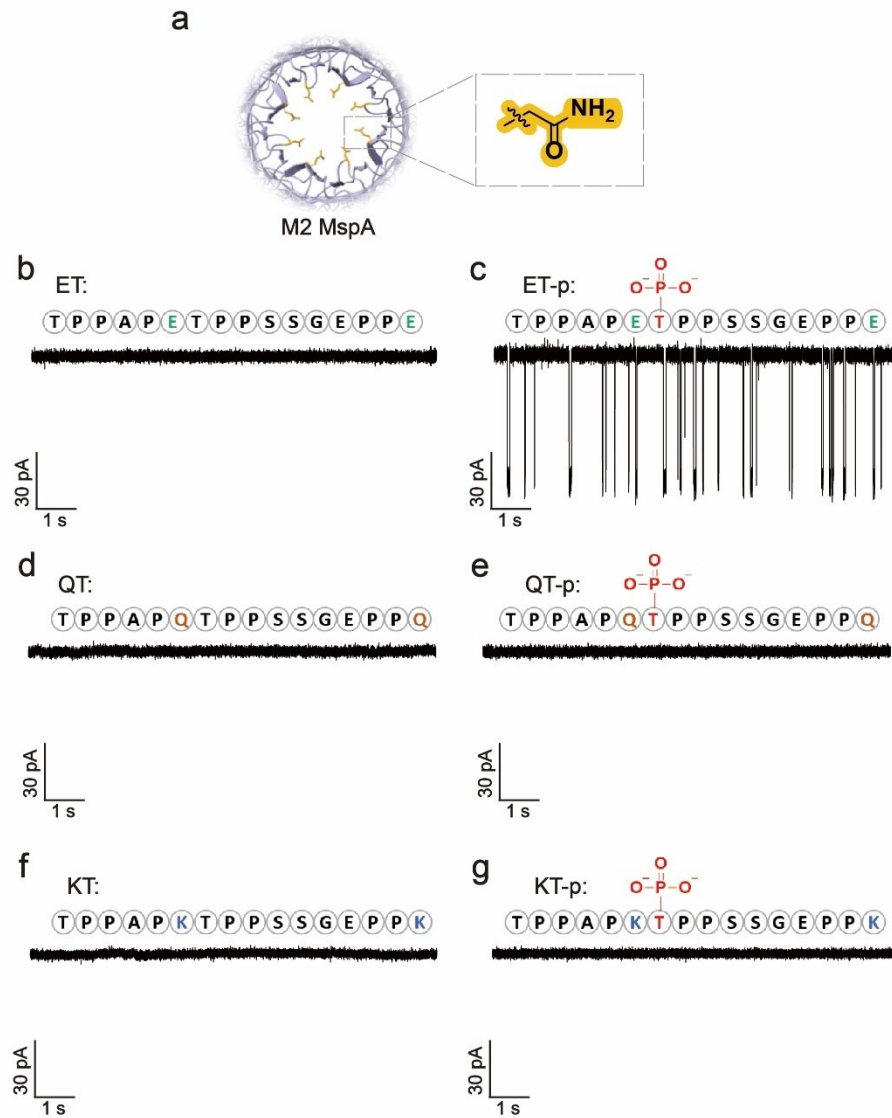

**Figure S16.** (a) Schematic diagram of the amino acid residue at site 91 within the M2 MspA nanopore. Representative current traces of the M2 MspA nanopore following the addition of ET (b), ET-p (c), QT (d), QT-p (e), KT (f) or KT-p (g), respectively as sole analytes. Successive sensing events were observed exclusively for ET-p, while no detectable events occurred with other peptides. Measurements were performed in the buffer of 1.0 M NaCl, 10.0 mM HEPES, pH 7.4, at an applied potential of +50 mV. Each peptide was tested separately at a final concentration of 5.0  $\mu\text{M}$ .

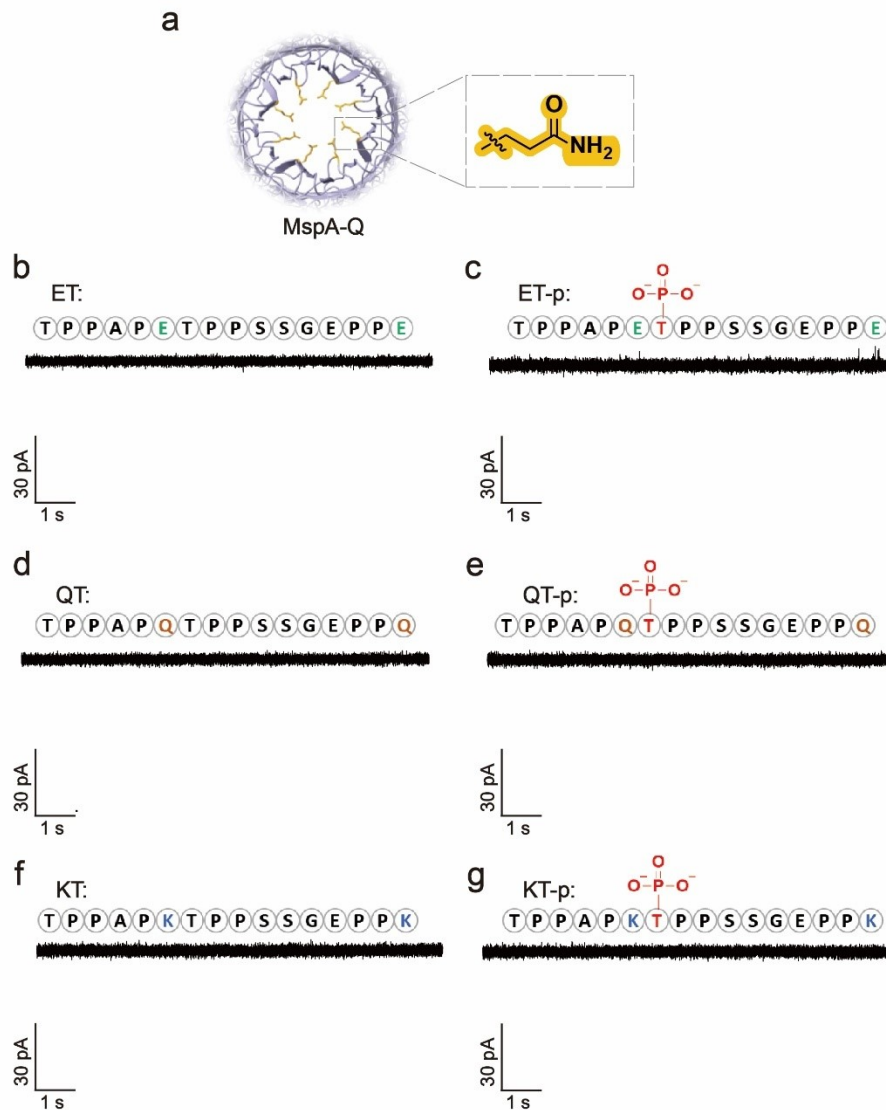

**Figure S17.** Schematic diagram of the acid residue at site 91 within the MspA-Q nanopore. Representative current traces of the MspA-Q nanopore following the addition of ET (b), ET-p (c), QT (d), QT-p (e), KT (f), or KT-p (g) as sole analytes. However, none of the peptides produced detectable events. Measurements were performed in the buffer of 1.0 M NaCl, 10.0 mM HEPES, pH 7.4, at an applied potential of +50 mV. Each peptide was tested separately at a final concentration of 5.0  $\mu$ M.

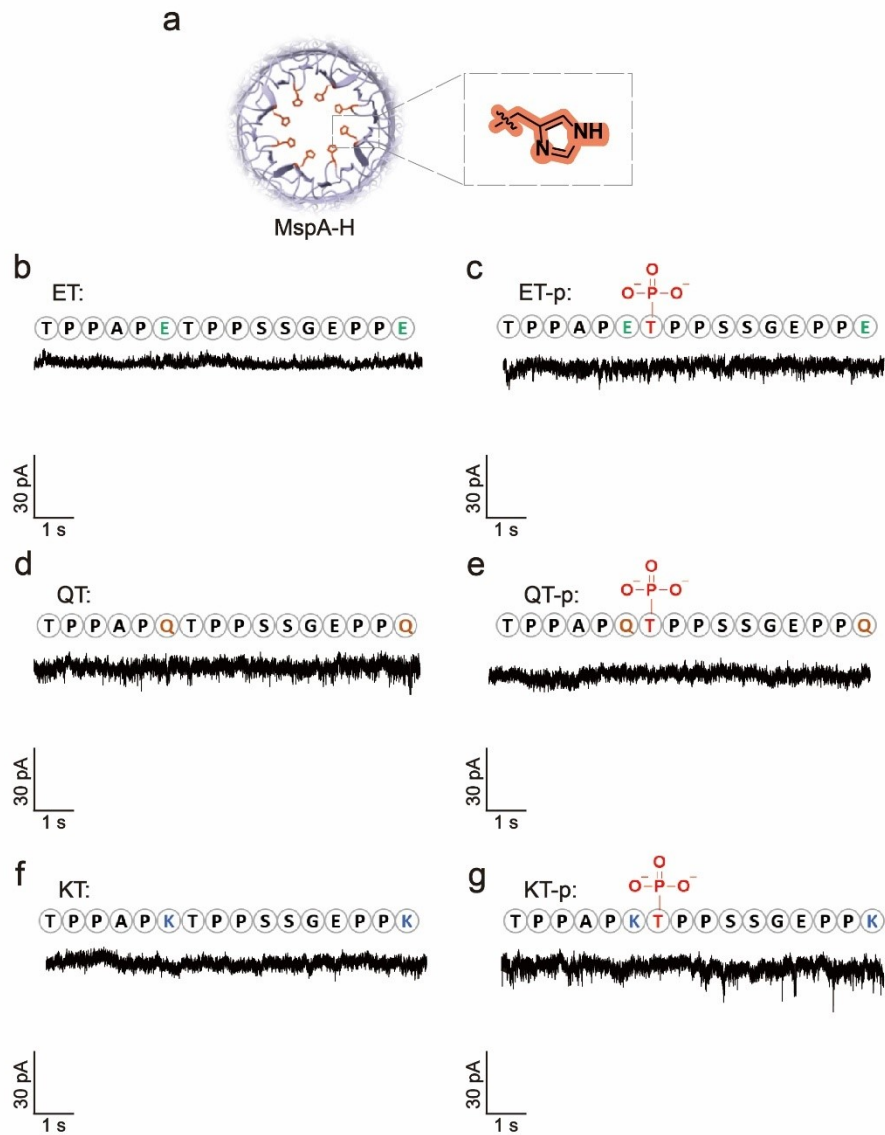

**Figure S18.** Schematic diagram of the acid residue at site 91 within the MspA-H nanopore. Representative current traces of the MspA-H nanopore following the addition of ET (b), ET-p (c), QT (d), QT-p (e), KT (f), or KT-p (g) as sole analytes. However, none of the peptides produced detectable events. Measurements were performed in the buffer of 1.0 M NaCl, 10.0 mM HEPES, pH 7.4 at an applied potential of +50 mV. Each peptide was tested separately at a final concentration of 5.0  $\mu$ M.

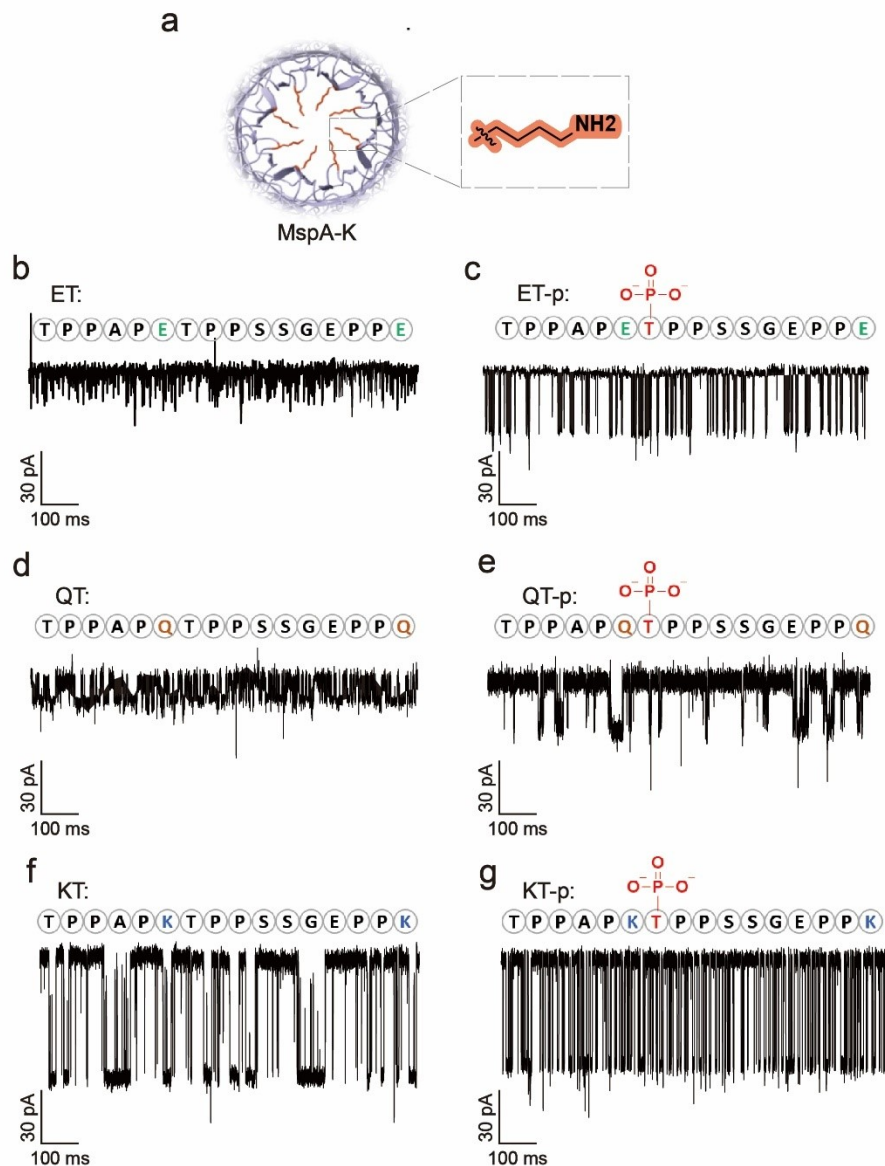

**Figure S19.** Schematic diagram of the acid residue at site 91 within the MspA-K nanopore. Representative current traces of the MspA-K nanopore following the addition of ET (b), ET-p (c), QT (d), QT-p (e), KT (f), or KT-p (g) as sole analytes. Measurements were performed in the buffer of 1.0 M NaCl, 10.0 mM HEPES, pH 7.4 at an applied potential of +50 mV. Each peptide was tested separately at a final concentration of 5.0  $\mu$ M.

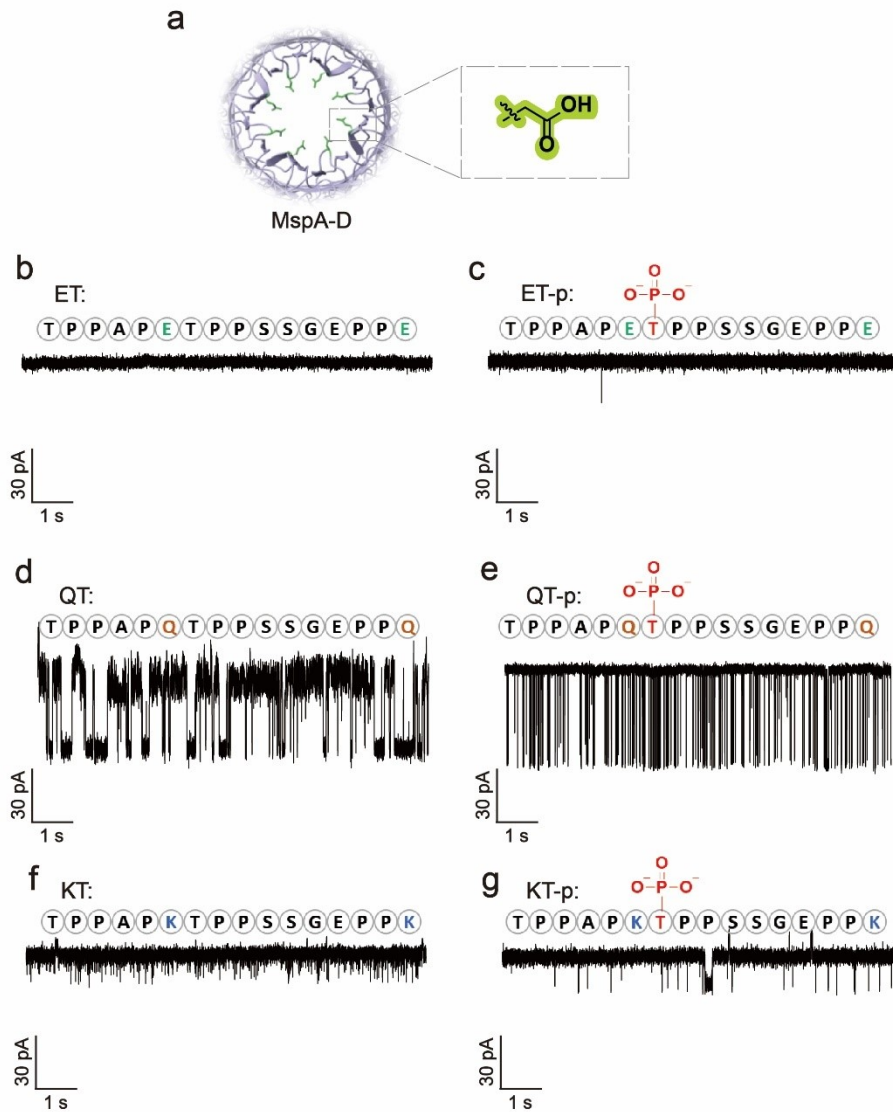

**Figure S20.** Schematic diagram of the acid residue at site 91 within the MspA-D nanopore. Representative current traces of the MspA-D nanopore following the addition of ET (b), ET-p (c), QT (d), QT-p (e), KT (f), or KT-p (g) as sole analytes. Measurements were performed in the buffer of 1.0 M NaCl, 10.0 mM HEPES, pH 7.4 at an applied potential of +50 mV. Each peptide was tested separately at a final concentration of 5.0  $\mu$ M.

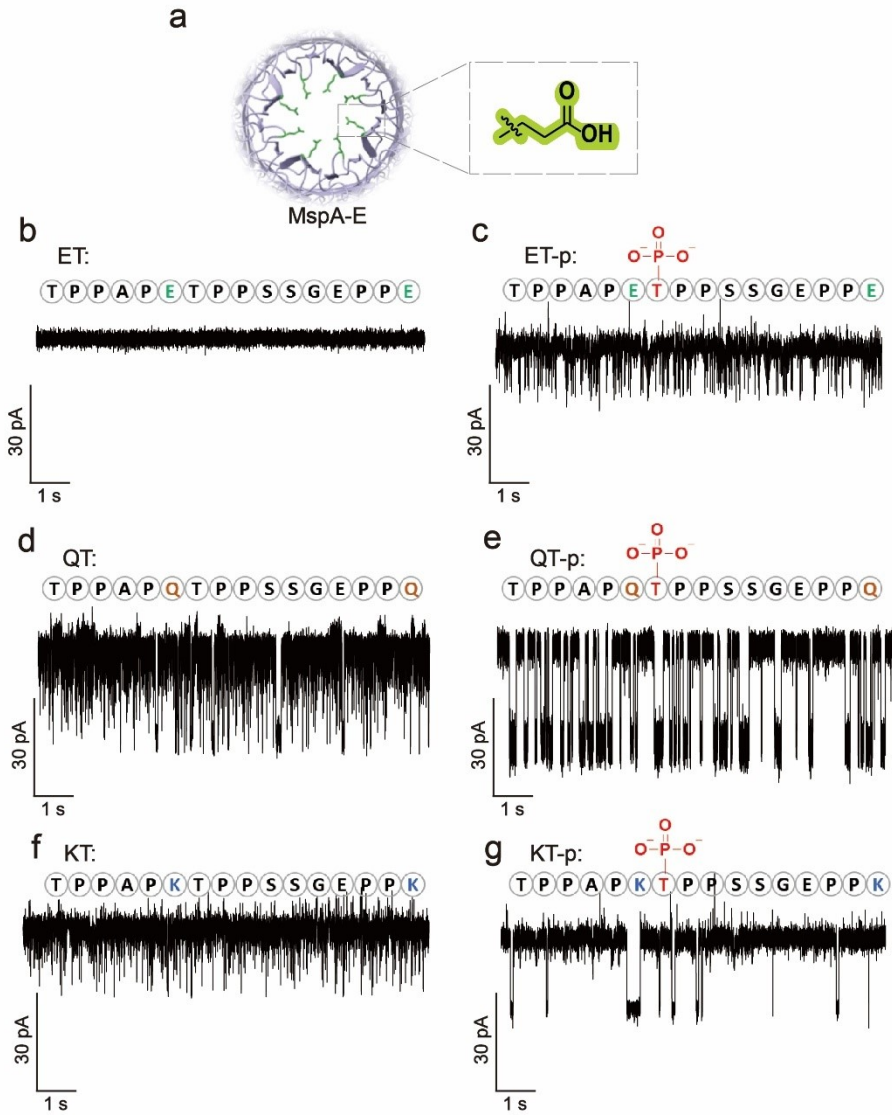

**Figure S21.** Schematic diagram of the acid residue at site 91 within the MspA-E nanopore. Representative current traces of the MspA-E nanopore following the addition of ET (b), ET-p (c), QT (d), QT-p (e), KT (f), or KT-p (g) as sole analytes. Measurements were performed in the buffer of 1.0 M NaCl, 10.0 mM HEPES, pH 7.4 at an applied potential of +50 mV. Each peptide was tested separately at a final concentration of 5.0  $\mu$ M.

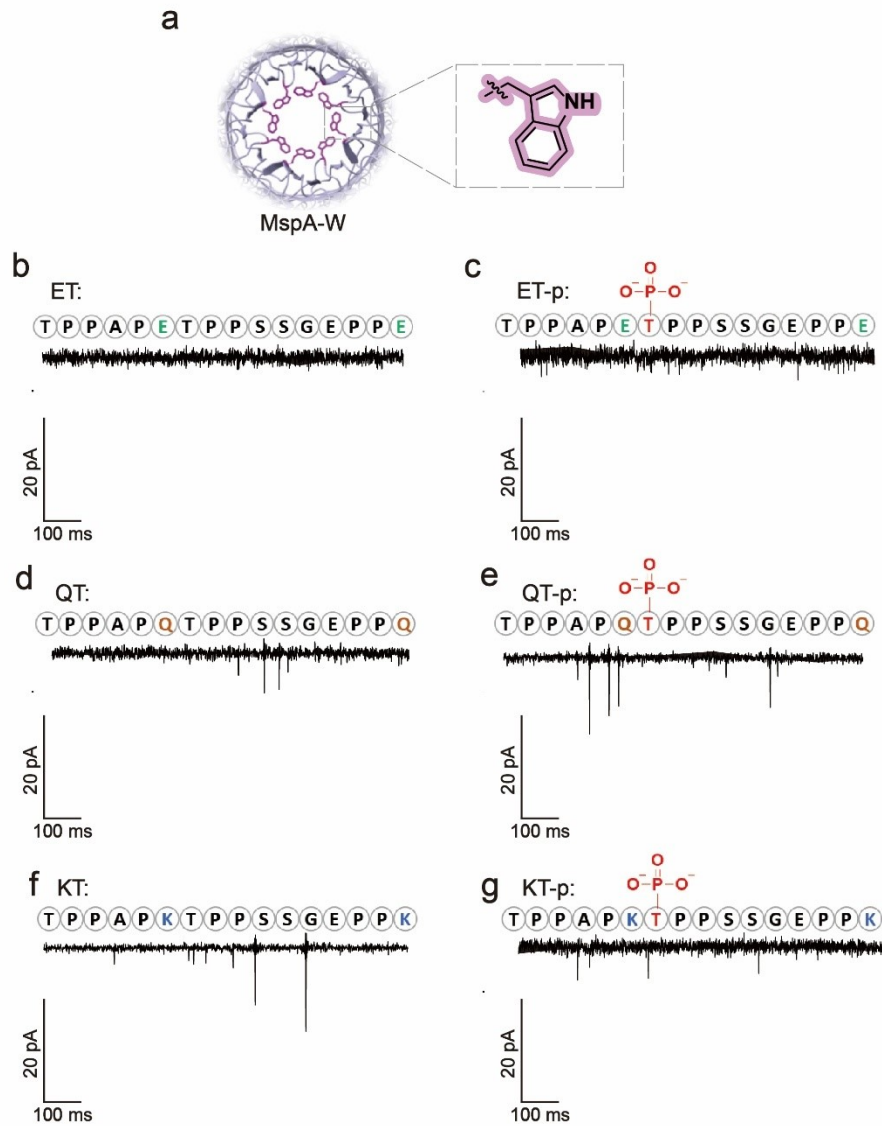

**Figure S22.** Schematic diagram of the acid residue at site 91 within the MspA-W nanopore. Representative current traces of the MspA-W nanopore following the addition of ET (b), ET-p (c), QT (d), QT-p (e), KT (f), or KT-p (g) as sole analytes. Measurements were performed in the buffer of 1.0 M NaCl, 10.0 mM HEPES, pH 7.4 at an applied potential of +50 mV. Each peptide was tested separately at a final concentration of 5.0  $\mu$ M.

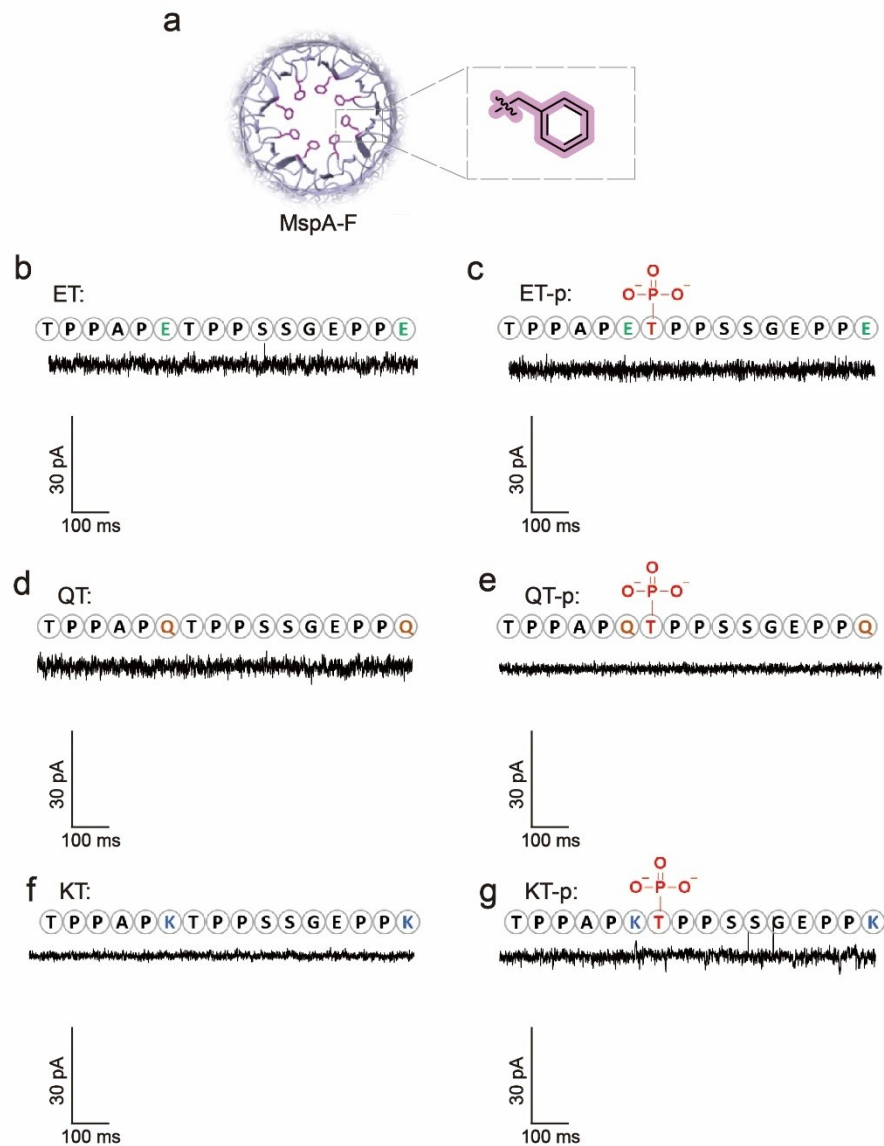

**Figure S23.** Schematic diagram of the acid residue at site 91 within the MspA-F nanopore. Representative current traces of the MspA-F nanopore upon addition of ET (b), ET-p (c), QT (d), QT-p (e), KT (f), or KT-p (g) as sole analytes. Measurements were performed in the buffer of 1.0 M NaCl, 10.0 mM HEPES, pH 7.4 at an applied potential of +50 mV. Each peptide was tested separately at a final concentration of 5.0  $\mu\text{M}$ .

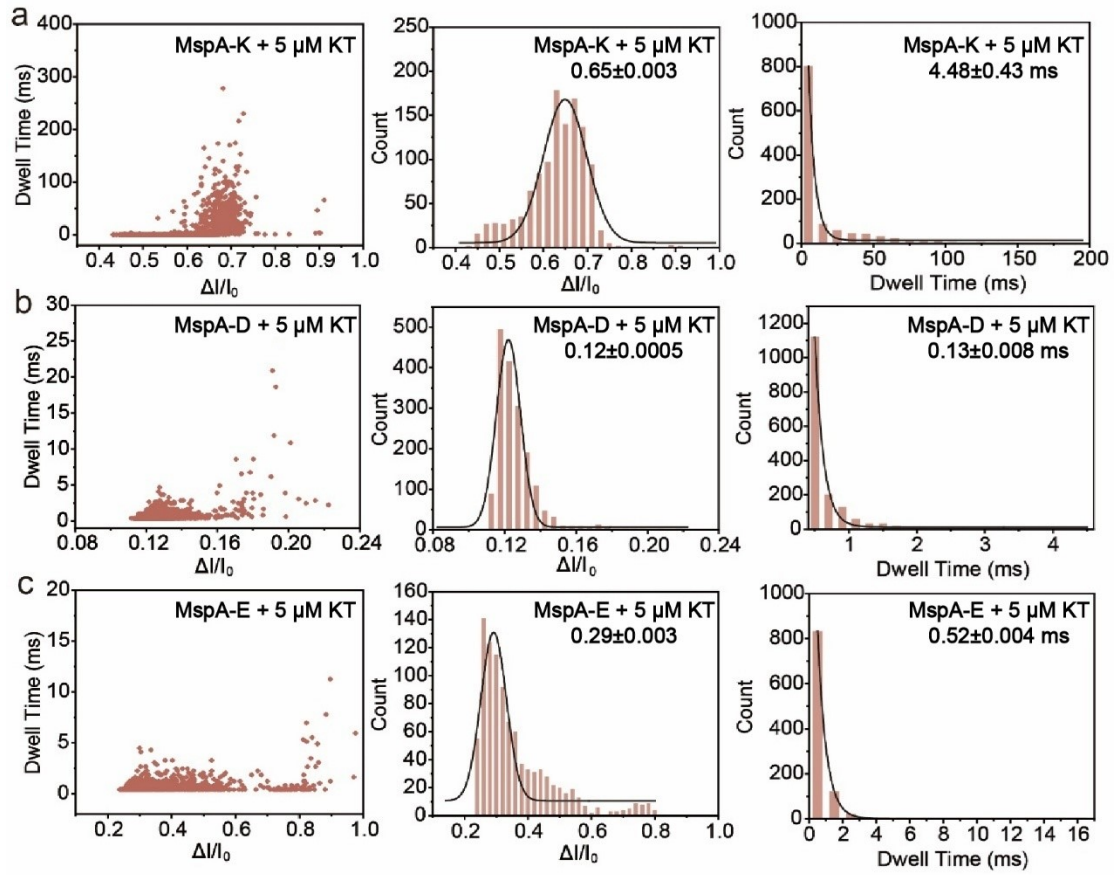

**Figure S24.** Scatter plot of  $\Delta I/I_0$  (left), histogram of  $\Delta I/I_0$  (middle) and dwell time histogram (right) for KT interactions with MspA nanopores (a: MspA-K; b: MspA-D; c: MspA-E) at an applied potential of +50 mV.

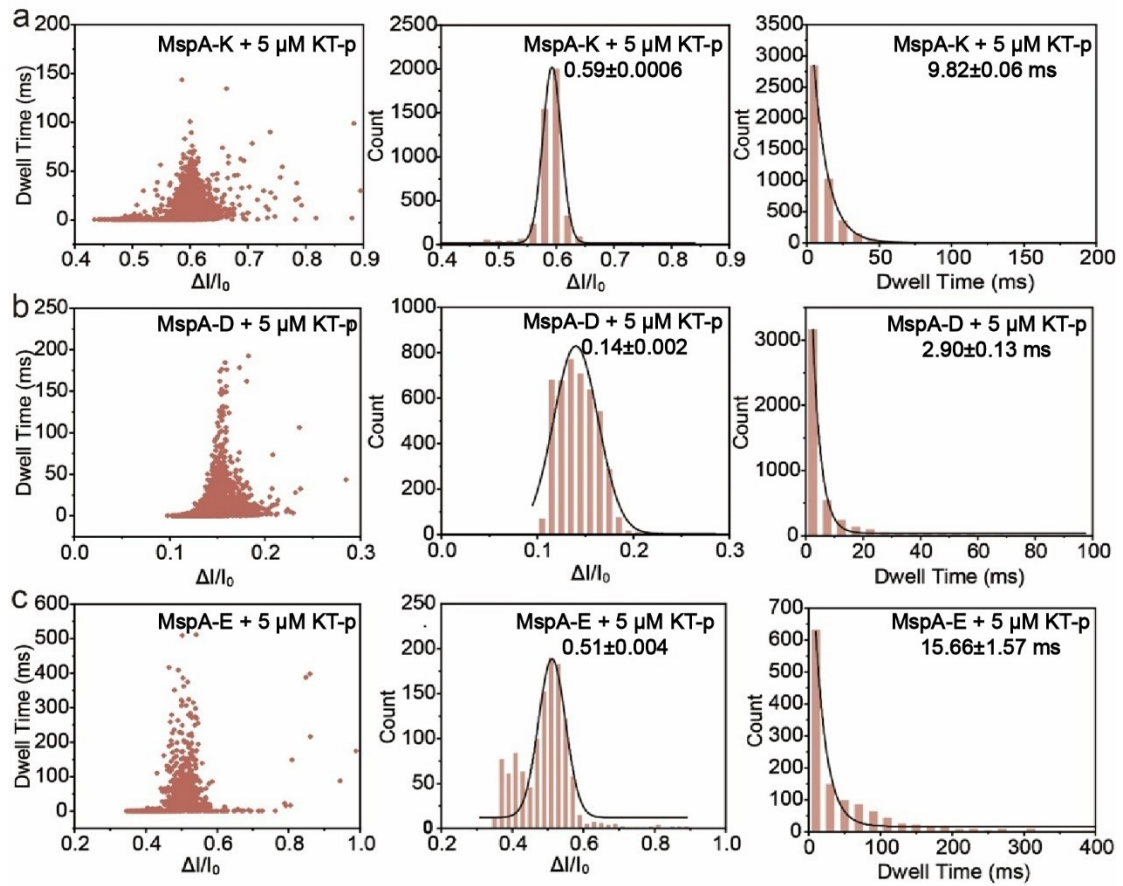

**Figure S25.** Scatter plot of  $\Delta I/I_0$  (left), histogram of  $\Delta I/I_0$  (middle) and dwell time histogram (right) for KT-p interactions with MspA nanopores (a: MspA-K; b: MspA-D; c: MspA-E) at an applied potential of +50 mV.

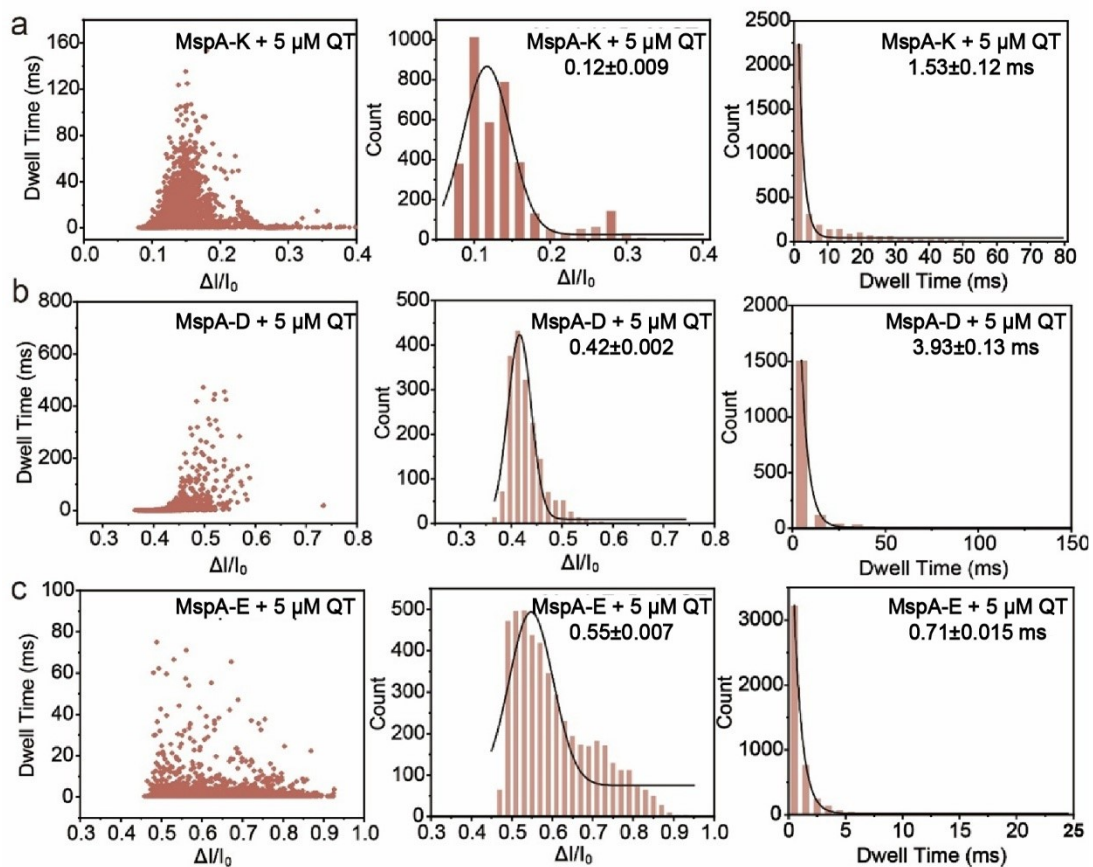

**Figure S26.** Scatter plot of  $\Delta I/I_0$  (left), histogram of  $\Delta I/I_0$  (middle) and dwell time histogram (right) for QT interactions with MspA nanopores (a: MspA-K; b: MspA-D; c: MspA-E) at an applied potential of +50 mV.

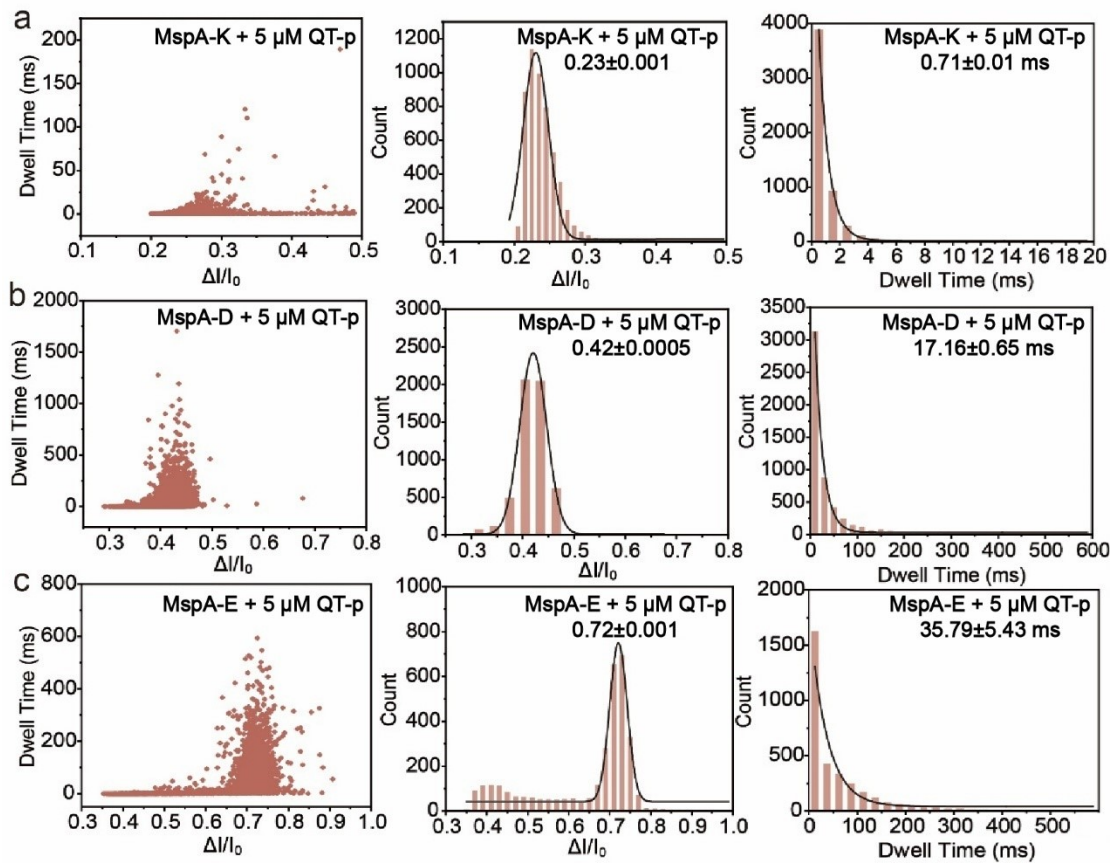

**Figure S27.** Scatter plot of  $\Delta I/I_0$  (left), histogram of  $\Delta I/I_0$  (middle) and dwell time histogram (right) for QT-p interactions with MspA nanopores (a: MspA-K; b: MspA-D; c: MspA-E) at an applied potential of +50 mV.

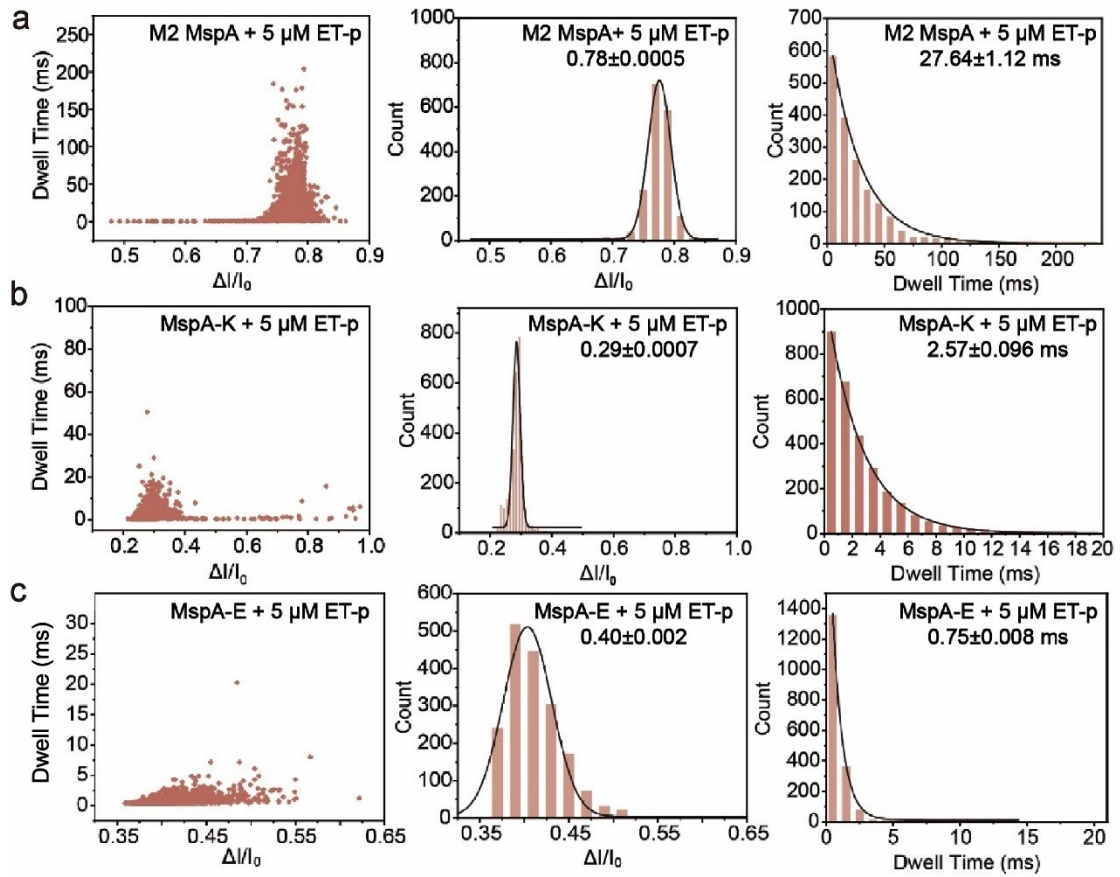

**Figure S28.** Scatter plot of  $\Delta I/I_0$  (left), histogram of  $\Delta I/I_0$  (middle) and dwell time histogram (right) for ET-p interactions with MspA nanopores (a: M2 MspA; b: MspA-K; c: MspA-E) at an applied potential of +50 mV.

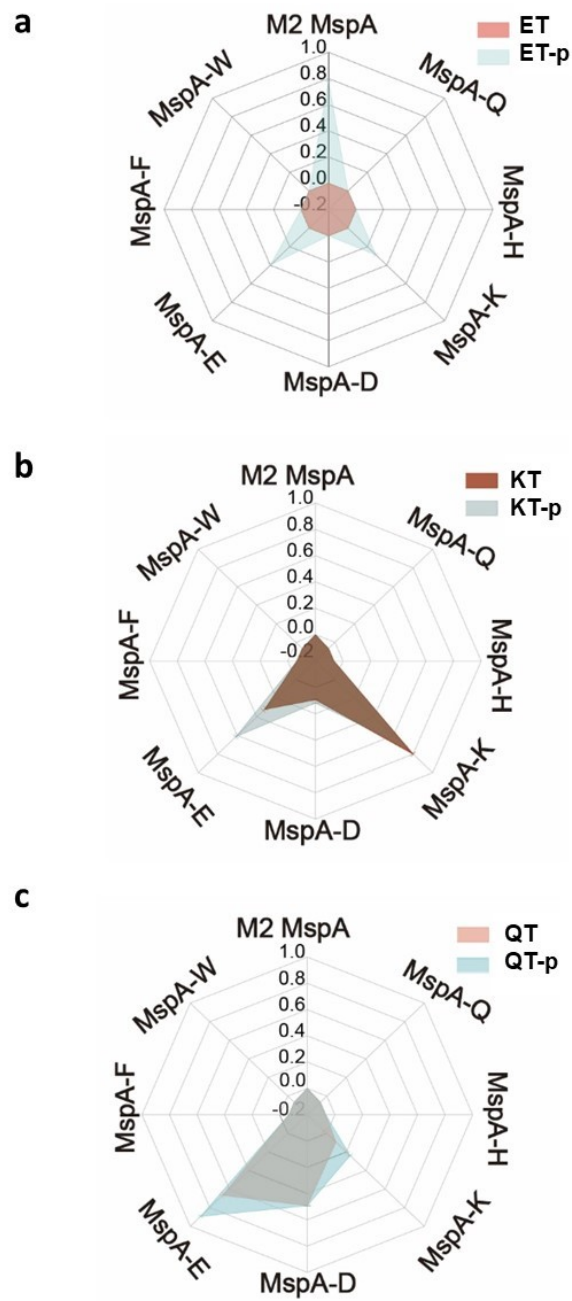

Figure S29. The radar diagrams of  $\Delta I/I_0$  for phosphorylated peptides.

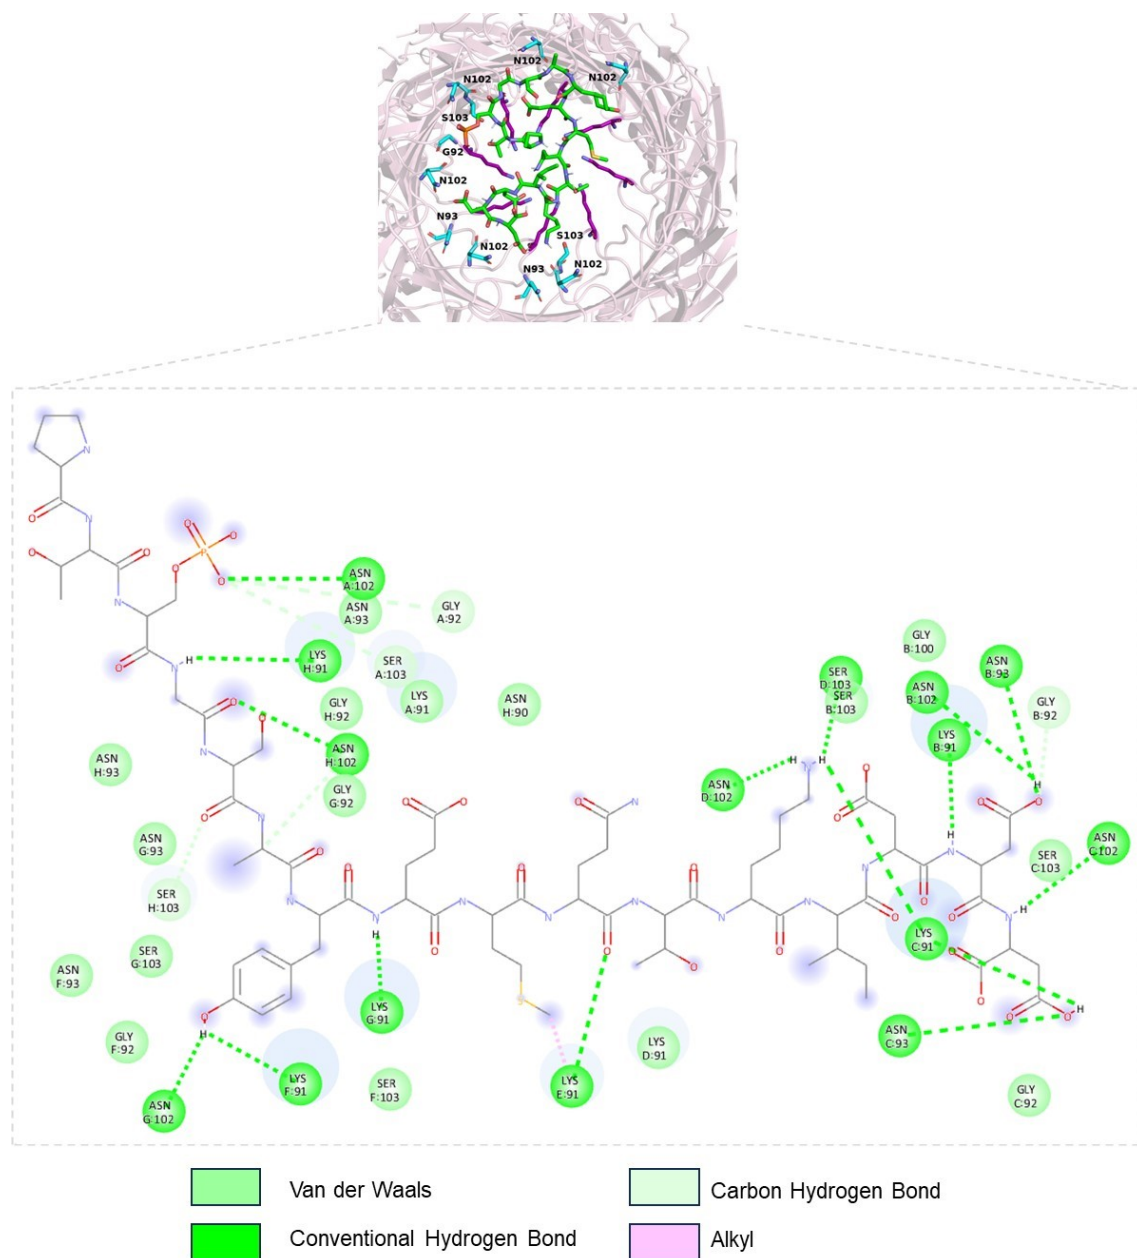

**Figure S30.** Characterization of PD-p peptide interactions with the microenvironment in MspA-K nanopores, including molecular docking analysis.

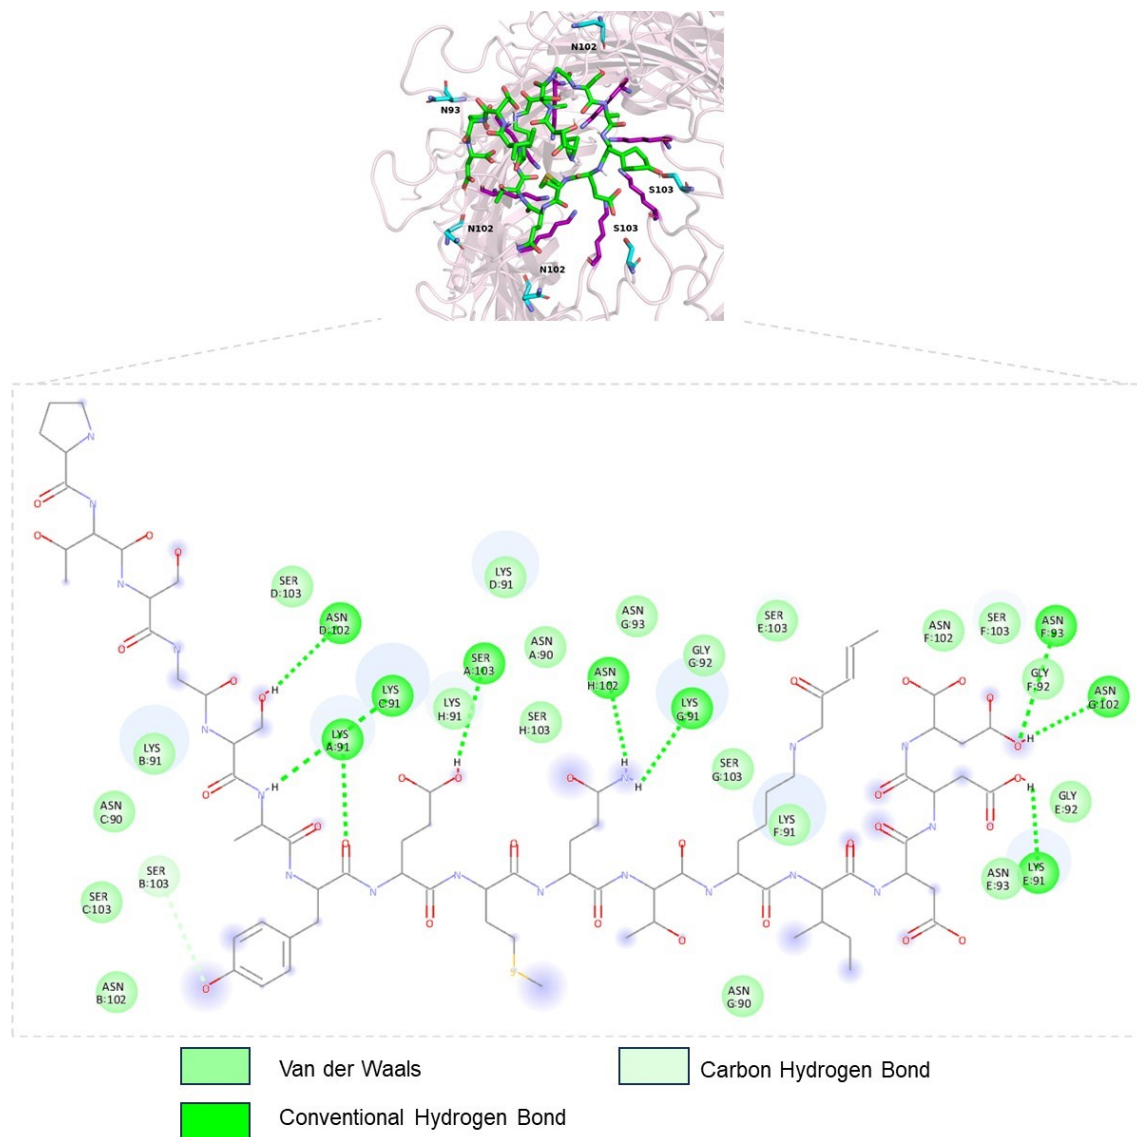

**Figure S31.** Characterization of PD-cr peptide interactions with the microenvironment in MspA-K nanopores, including molecular docking analysis.

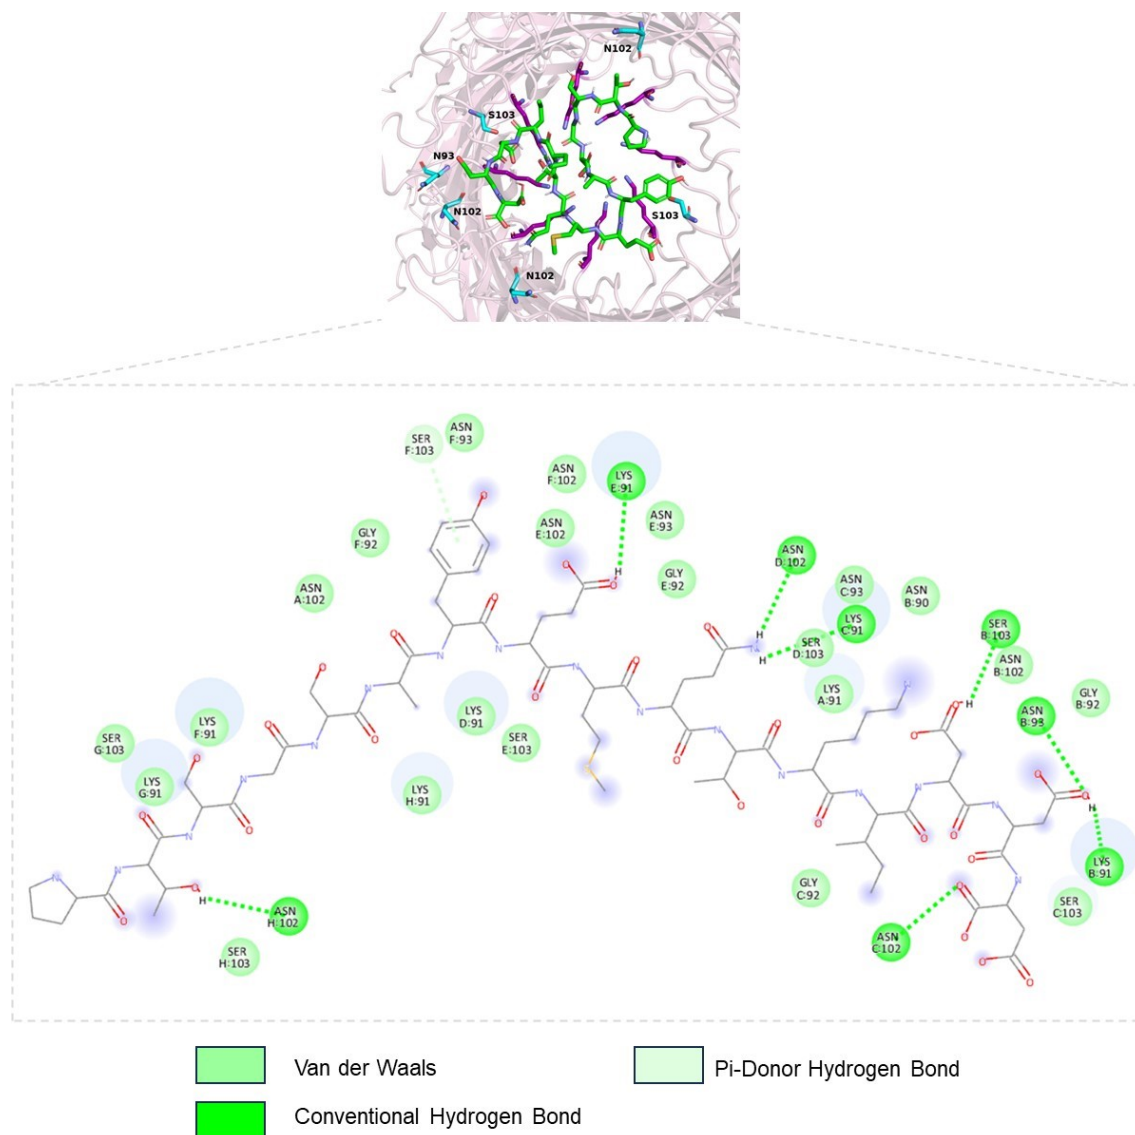

**Figure S32.** Characterization of PD peptide interactions with the microenvironment in MspA-K nanopores, including molecular docking analysis.

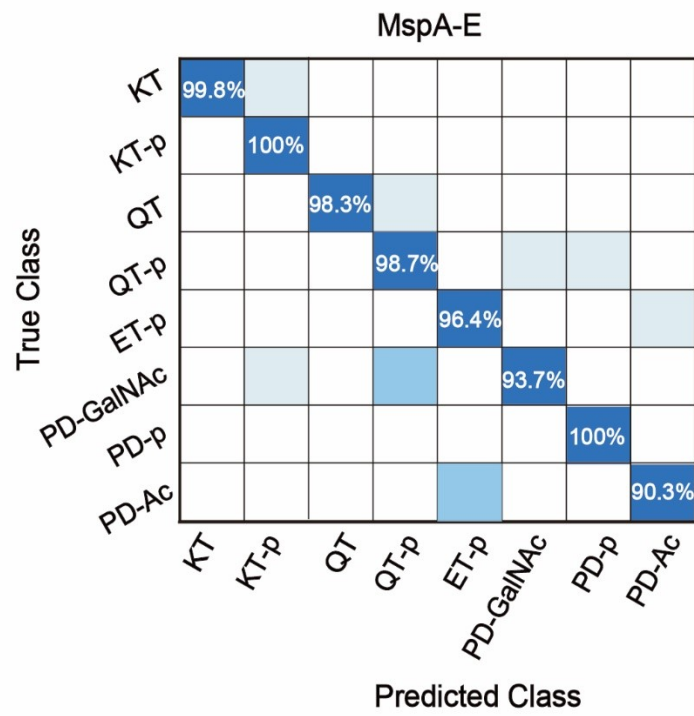

**Figure S33.** PTMs identification by machine learning. The confusion matrix of 8 types of peptides classification in MspA-E generated using the bagged trees model. The validation accuracy reaches a score of 0.979, and the test accuracy is 0.982.

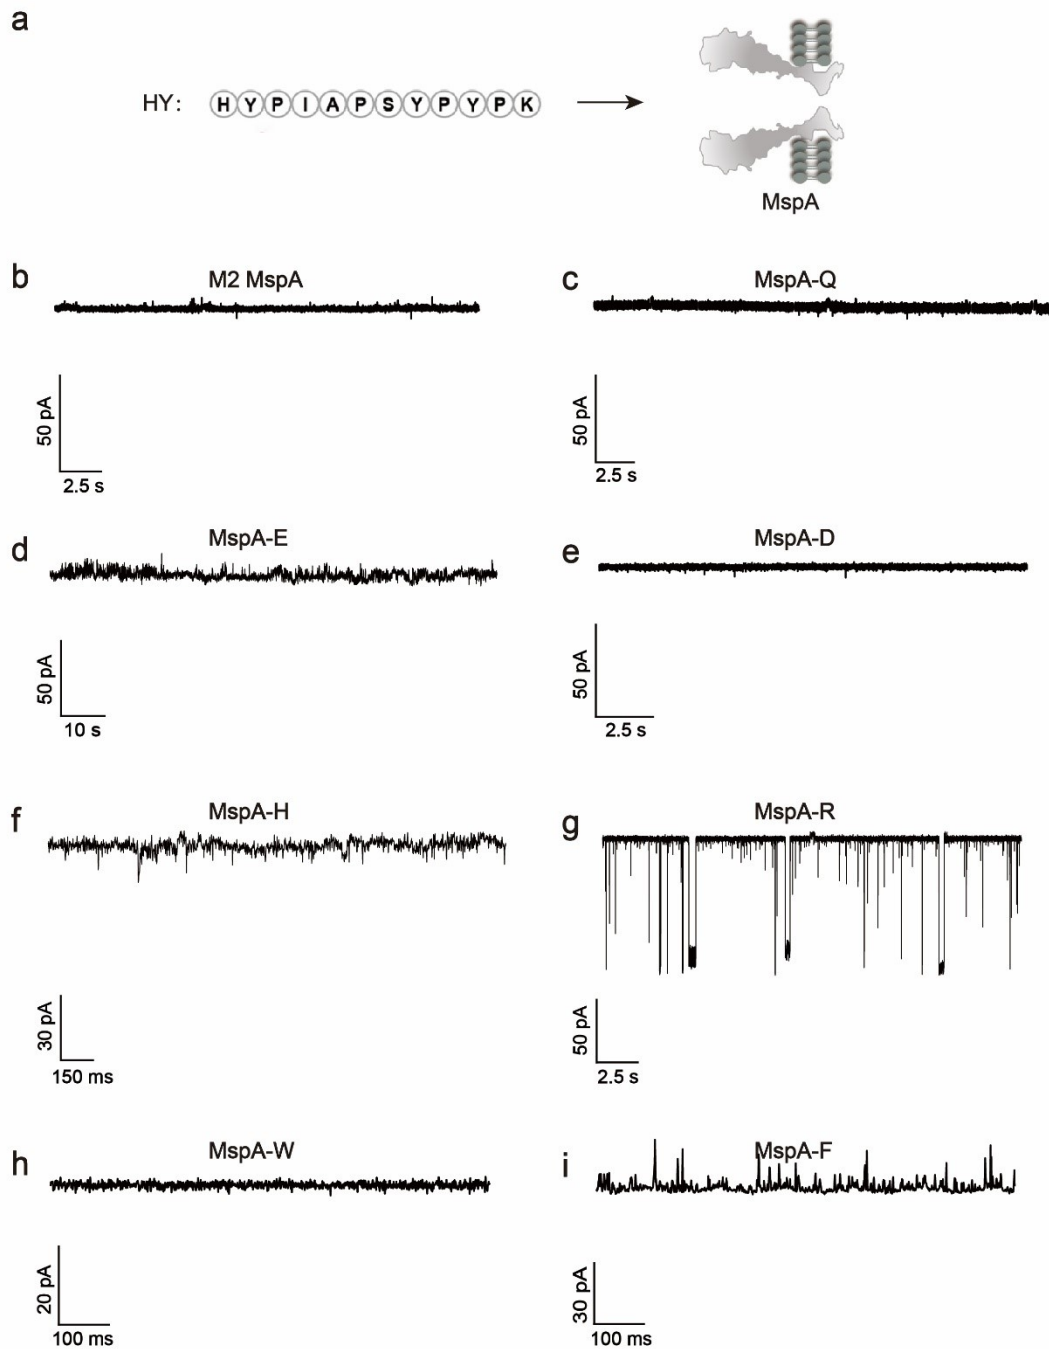

**Figure S34.** (a) Schematic diagram of the detection of HY with MspA nanopores. (b-i) Representative current traces of the MspA mutant nanopores following the addition of HY: M2 MspA (b); MspA-Q (c); MspA-E (d); MspA-D (e); MspA-H (f); MspA-R (g); MspA-W (h); MspA-F (i). Measurements were performed in the buffer of 1.0 M NaCl, 10.0 mM HEPES, pH 7.4 at an applied potential of +50 mV. Each peptide was tested separately at a final concentration of 5.0  $\mu$ M.

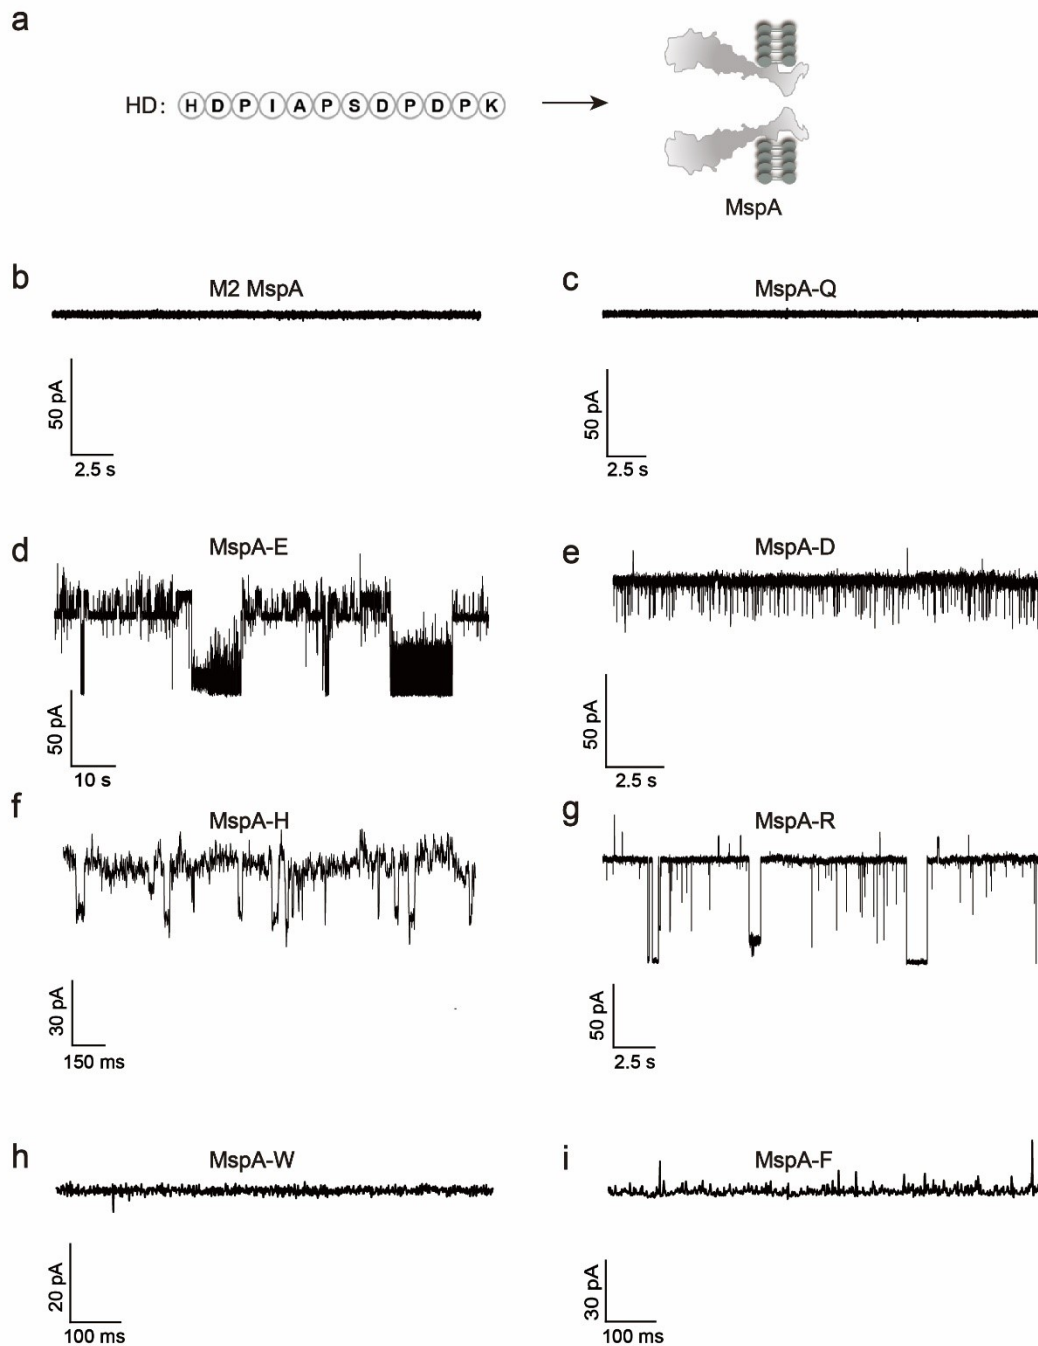

**Figure S35.** (a) Schematic diagram of the MspA nanopores detection for HD. (b-i) Representative current traces of the MspA mutant nanopores following the addition of HD: M2 MspA (b); MspA-Q (c); MspA-E (d); MspA-D (e); MspA-H (f); MspA-R (g); MspA-W (h); MspA-F (i). Measurements were performed in the buffer of 1.0 M NaCl, 10.0 mM HEPES, pH 7.4 at an applied potential of +50 mV. Each peptide was tested separately at a final concentration of 5.0  $\mu$ M.

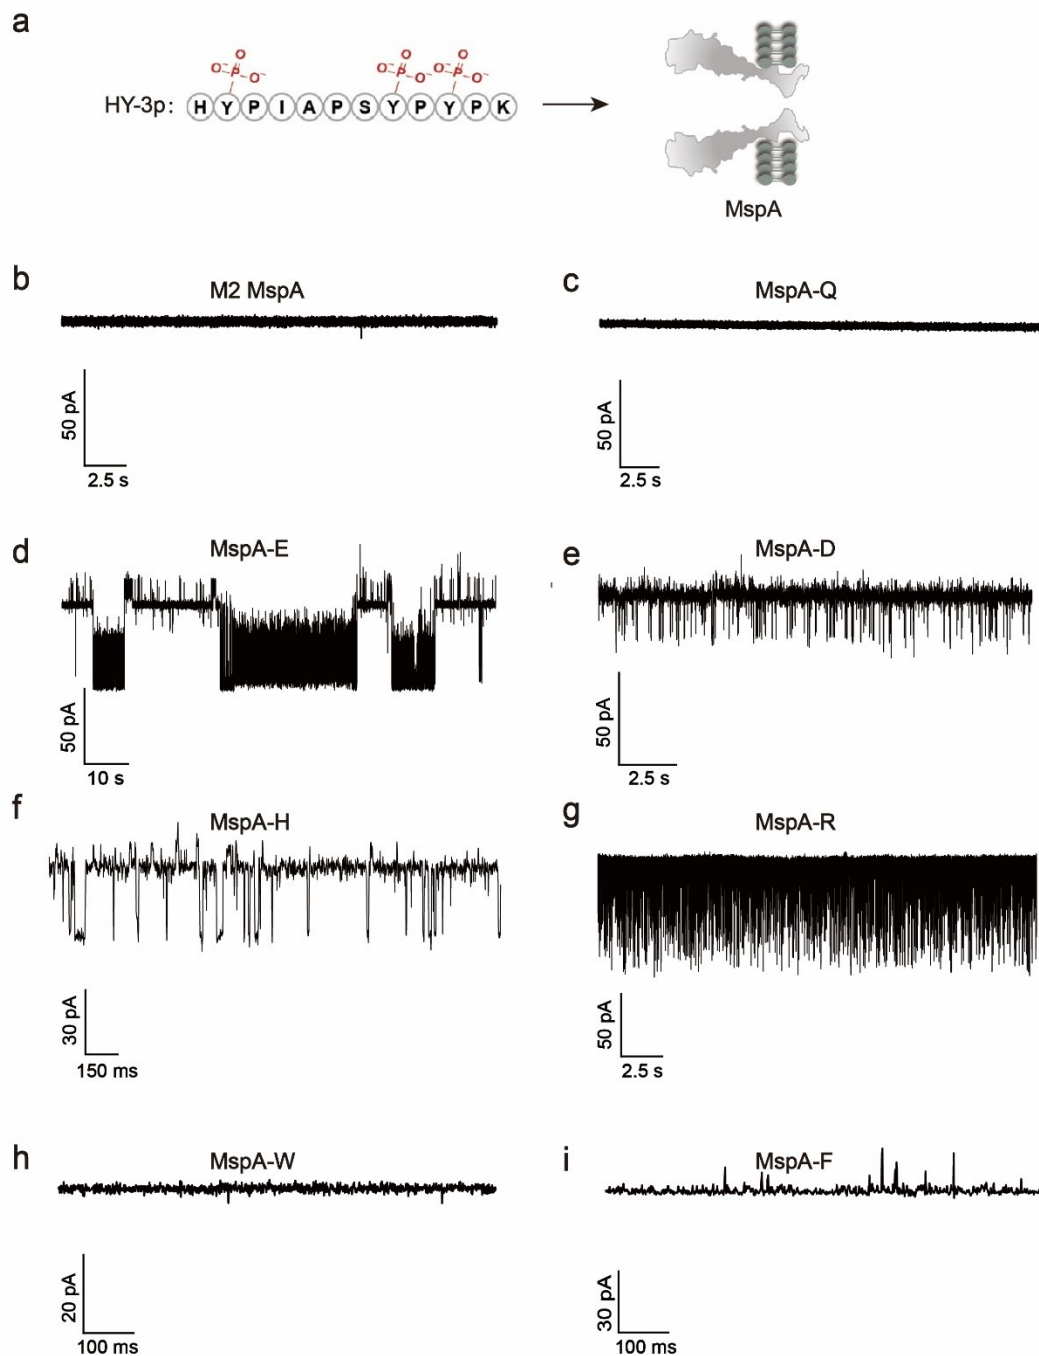

**Figure S36.** (a) Schematic diagram of the MspA nanopores detection for HY-p. (b-i) Representative current traces of the MspA mutant nanopores following the addition of HY: M2 MspA (b); MspA-Q (c); MspA-E (d); MspA-D (e); MspA-H (f); MspA-R (g); MspA-W (h); MspA-F (i). Measurements were performed in the buffer of 1.0 M NaCl, 10.0 mM HEPES, pH 7.4 at an applied potential of +50 mV. Each peptide was tested separately at a final concentration of 5.0  $\mu$ M.

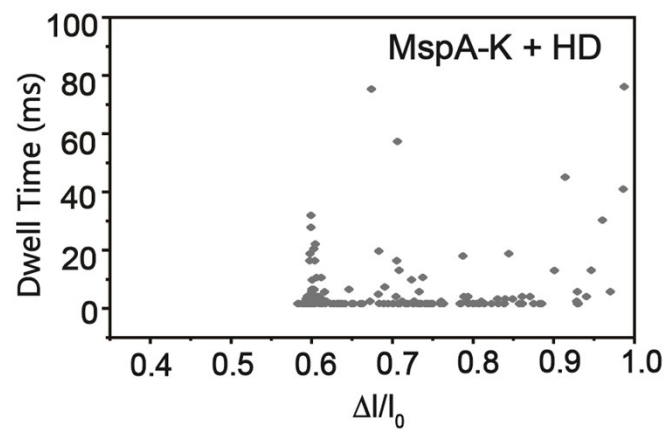

**Figure S37.** Scatter-plot of  $\Delta I/I_0$  for HD using MspA-K. Measurements were performed in the buffer of 1.0 M NaCl, 10.0 mM HEPES, pH 7.4 at an applied potential of +50 mV.

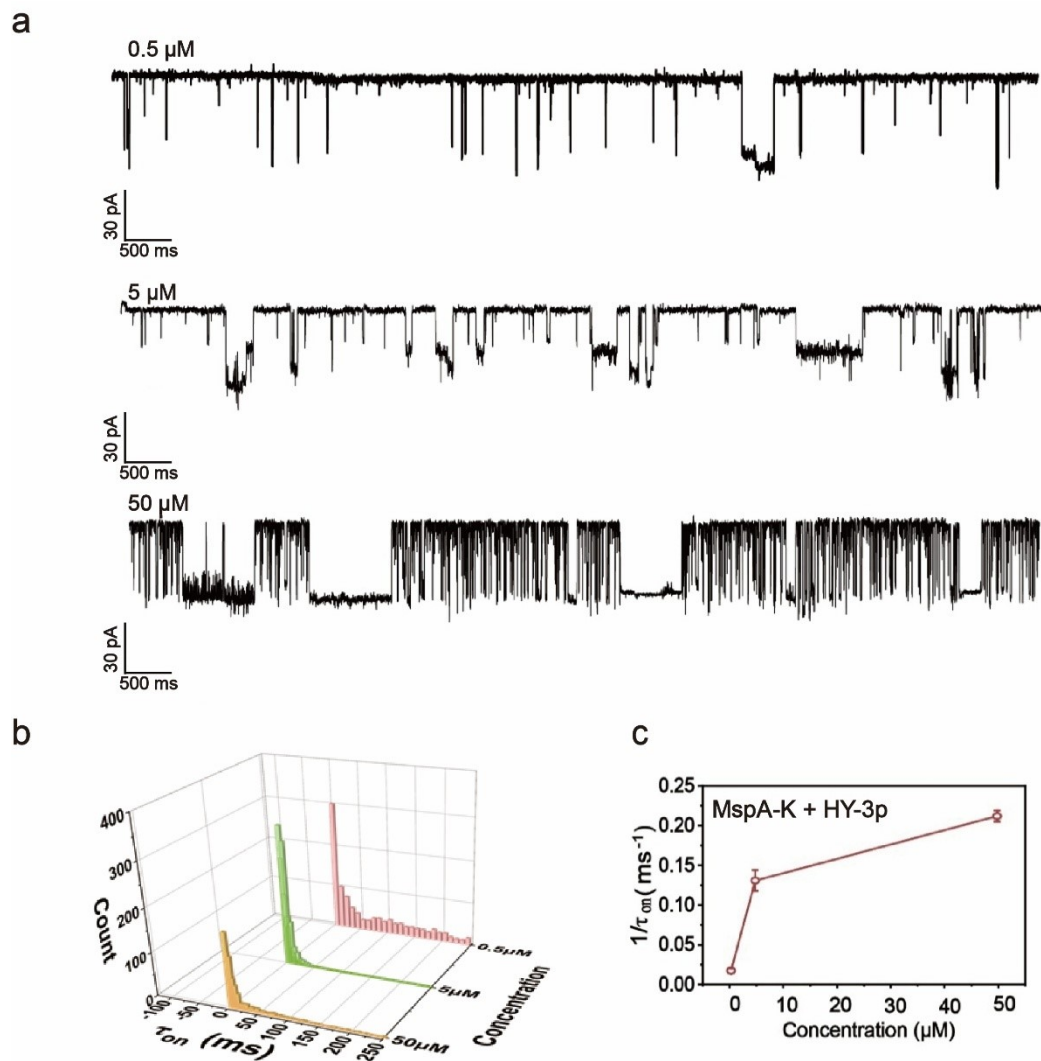

**Figure S38.** (a) Representative current traces acquired with varying HY-3p concentrations. The measurements were carried out in the buffer of 1.0 M NaCl, 10.0 mM HEPES, pH 7.4 at an applied potential of +50 mV. A potential of +50 mV was constantly applied. (b) HY-3p was added with a final concentration of 0.5-50 μM. (c) The histogram of  $\tau_{on}$  and plot of  $1/\tau_{on}$  versus HY-3p concentration. Whereas  $1/\tau_{on}$  increases when the HY-3p concentration is increased.

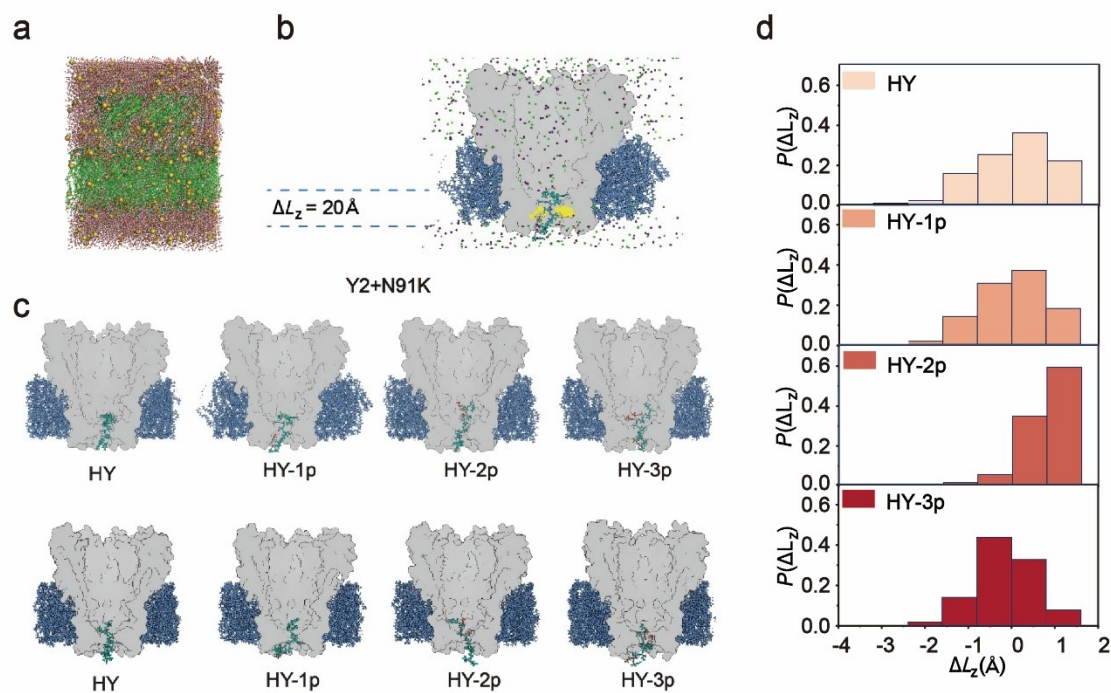

**Figure S39.** (a) Snapshot for the simulation box. (b) The current was calculated within an  $\Delta L_z=20 \text{ \AA}$  thickness slab centered at the 91 site of MspA-K nanopore. (c) During the simulation, Y2 and Y8@Y10 of peptides were respectively positioned in close proximity to N91K. (d) Probability distribution of peptides displacement under electric field driving during simulated observation time (Y8@Y10 + N91K).

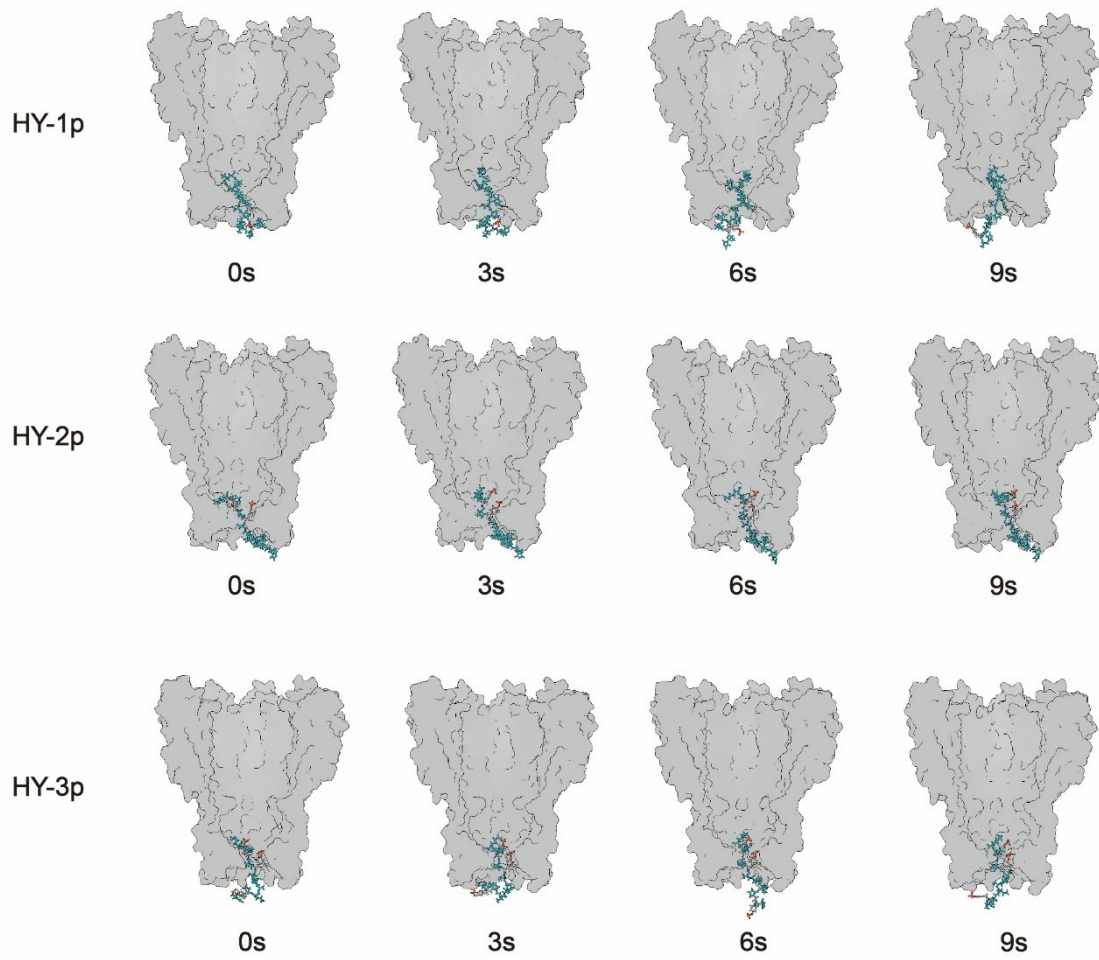

**Figure S40.** Time-based snapshots for the simulation scenarios studied.

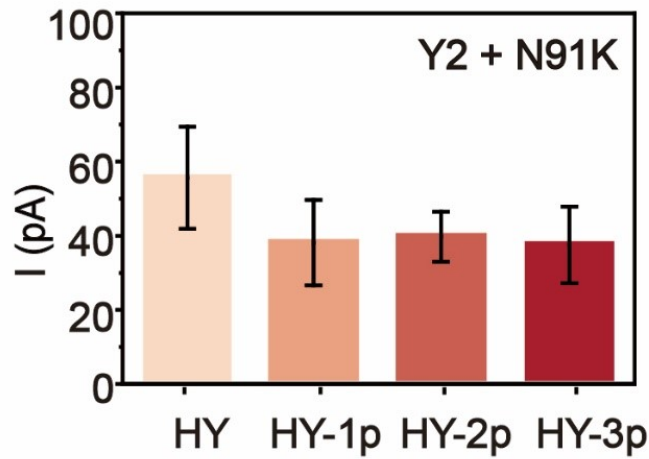

**Figure S41.** Simulated current blockade levels (Y2 + N91K).

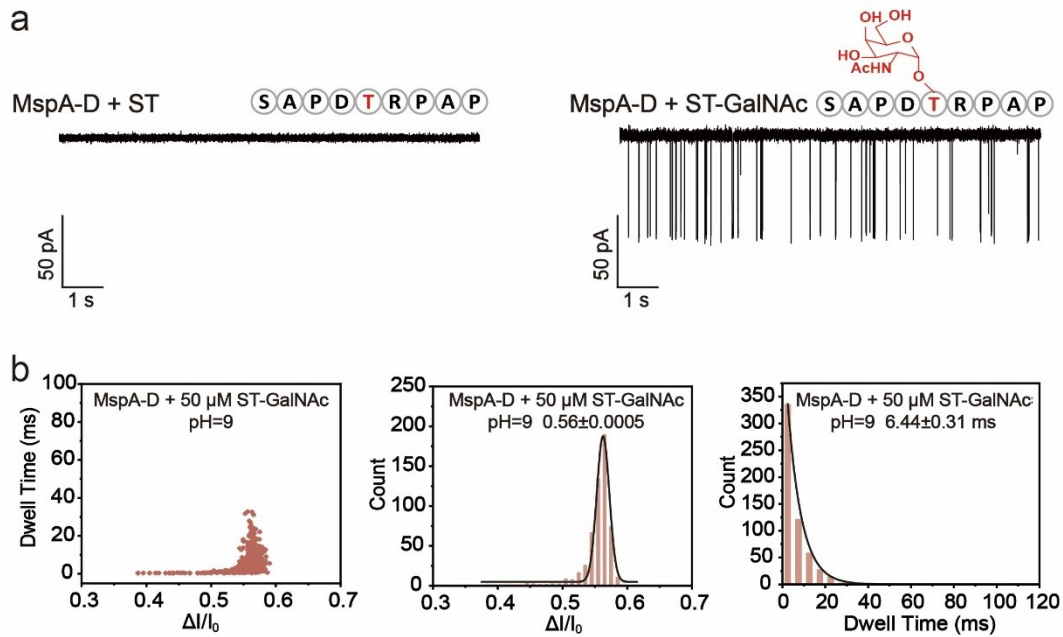

**Figure S42.** (a) Representative current traces of ST and ST-GalNAc with MspA-D. The measurements were carried out in the buffer of 1.0 M NaCl, 10.0 mM HEPES, pH 9.0. All peptides were added with a final concentration of 50.0  $\mu$ M for each analyte. (b) Scatter plot of  $\Delta I/I_0$ , histogram of  $\Delta I/I_0$  and dwell time histogram for ST-GalNAc interactions with MspA-D at an applied potential of +50 mV.

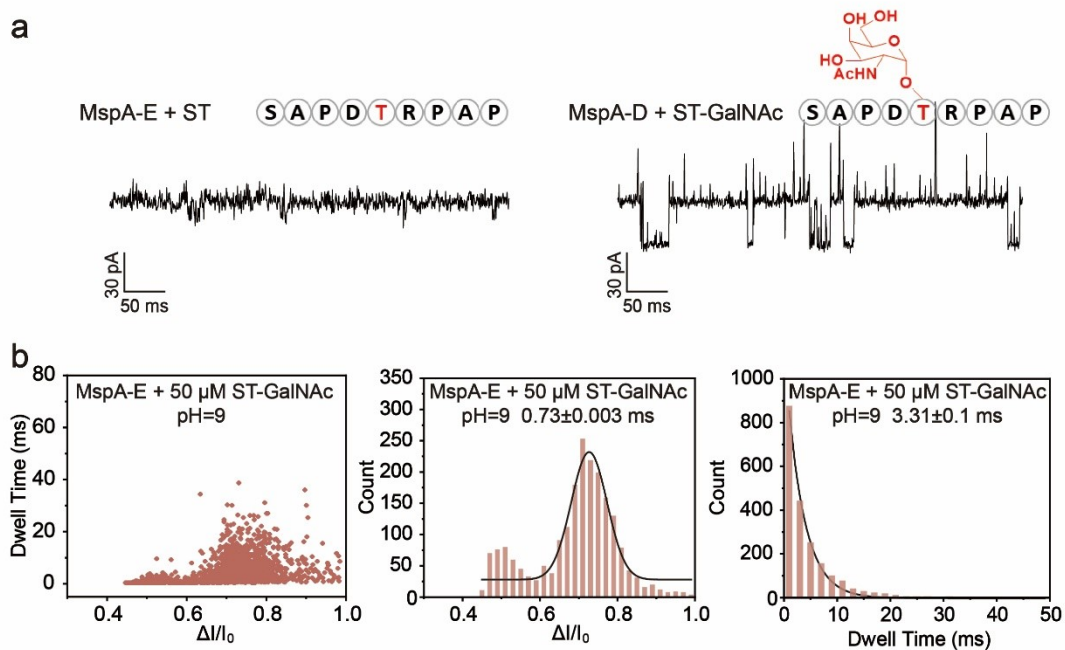

**Figure S43.** (a) Representative current traces of ST and ST-GalNac with MspA-E. The measurements were carried out in the buffer of 1.0 M NaCl, 10.0 mM HEPES, pH 9.0. All peptides were added to a final concentration of 50.0  $\mu$ M. (b) Scatter plot of  $\Delta I/I_0$ , histogram of  $\Delta I/I_0$  and dwell time histogram for ST-GalNac interactions with MspA-E at an applied potential of +50 mV.

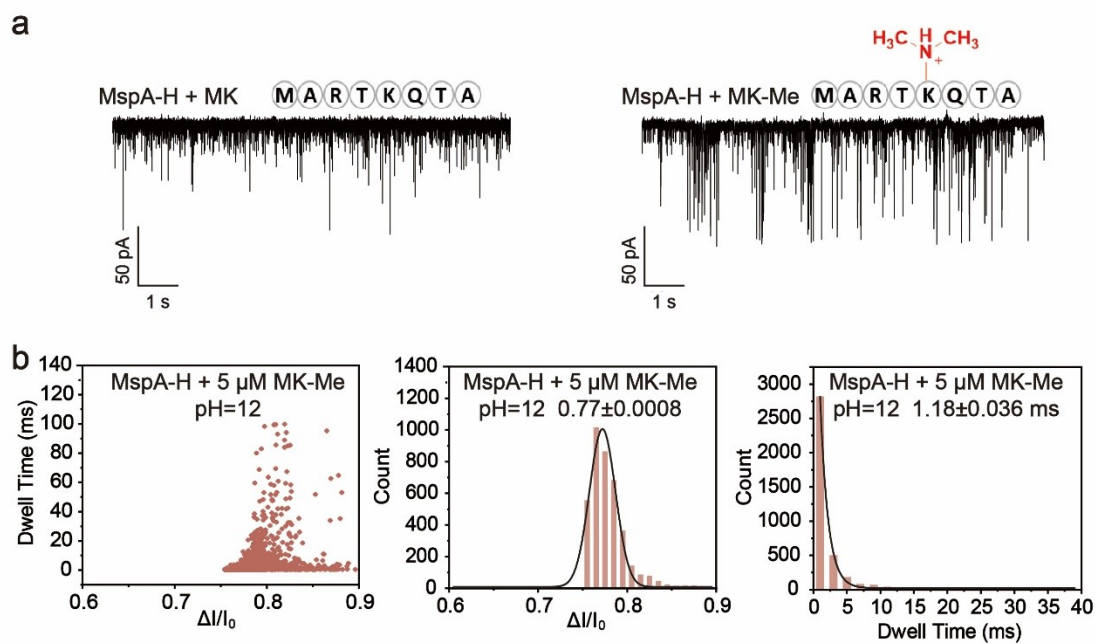

**Figure S44.** (a) Representative current traces of MK and MK-Me with MspA-H. The measurements were carried out in the buffer of 1.0 M NaCl, 10.0 mM HEPES, pH 12.0. All peptides were added to a final concentration of 5.0  $\mu\text{M}$ . (b) Scatter plot of  $\Delta I/I_0$ , histogram of  $\Delta I/I_0$  and dwell time histogram for MK-Me interactions with MspA-H at an applied potential of +50 mV.

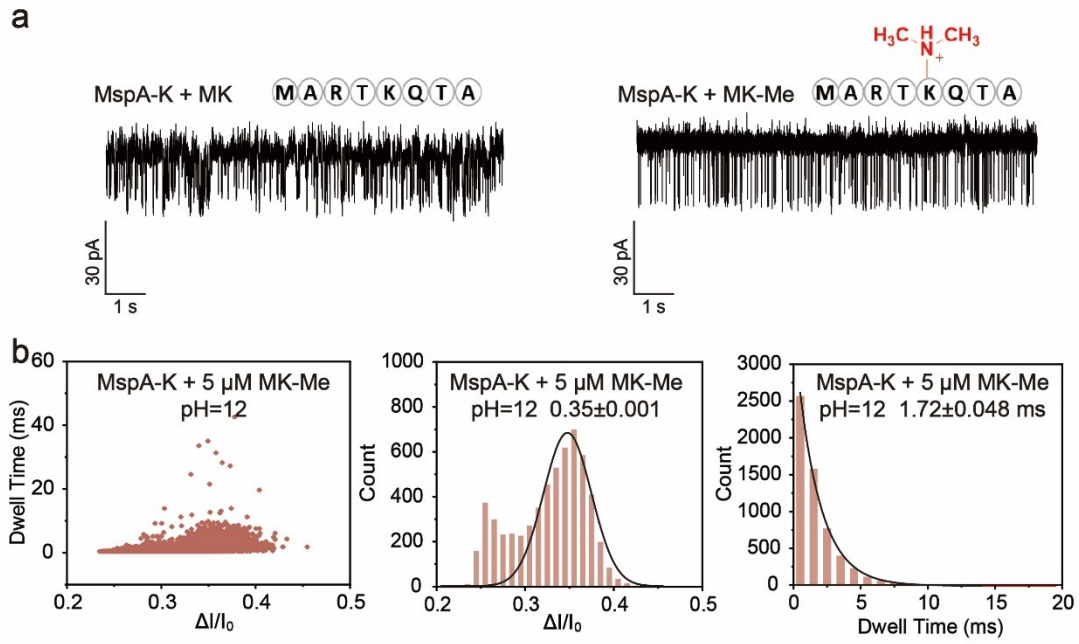

**Figure S45.** (a) Representative current traces of MK and MK-Me with MspA-K. The measurements were carried out in the buffer of 1.0 M NaCl, 10.0 mM HEPES, pH 12.0. All peptides were added to a final concentration of 5.0  $\mu$ M. (b) Scatter plot of  $\Delta I/I_0$ , histogram of  $\Delta I/I_0$  and dwell time histogram for MK-Me interactions with MspA-K at an applied potential of +50 mV.

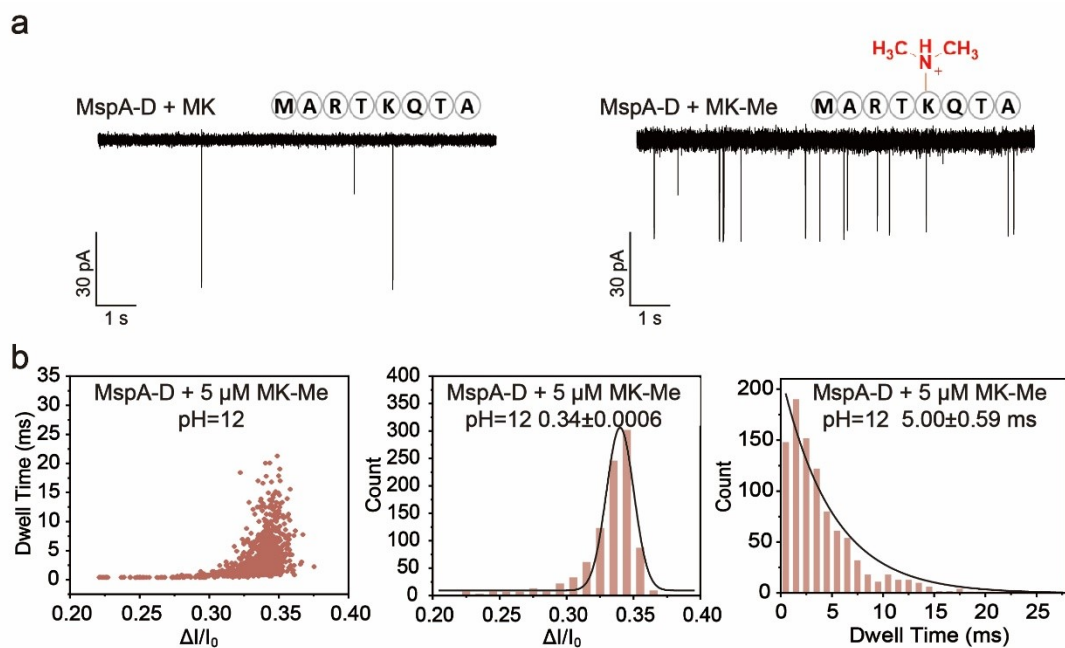

**Figure S46.** (a) Representative current traces of MK and MK-Me with MspA-D. The measurements were carried out in the buffer of 1.0 M NaCl, 10.0 mM HEPES, pH 12.0. All peptides were added to a final concentration of 5.0  $\mu$ M. (b) Scatter plot of  $\Delta I/I_0$ , histogram of  $\Delta I/I_0$  and dwell time histogram for MA-Me interactions with MspA-D at an applied potential of +50 mV.

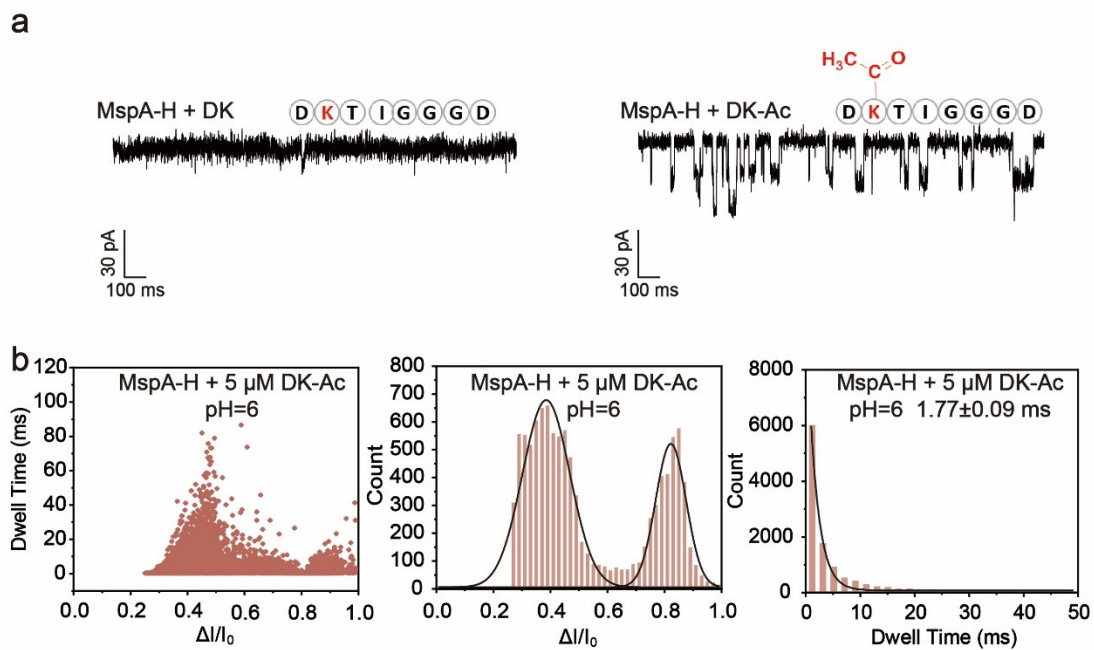

**Figure S47.** (a) Representative current traces of DK and DK-Ac with MspA-H. The measurements were carried out in the buffer of 1.0 M NaCl, 10.0 mM HEPES, pH 6.0. All peptides were added to a final concentration of 5.0  $\mu$ M. (b) Scatter plot of  $\Delta I/I_0$ , histogram of  $\Delta I/I_0$  and dwell time histogram for DK-Ac interactions with MspA-H at an applied potential of +50 mV.

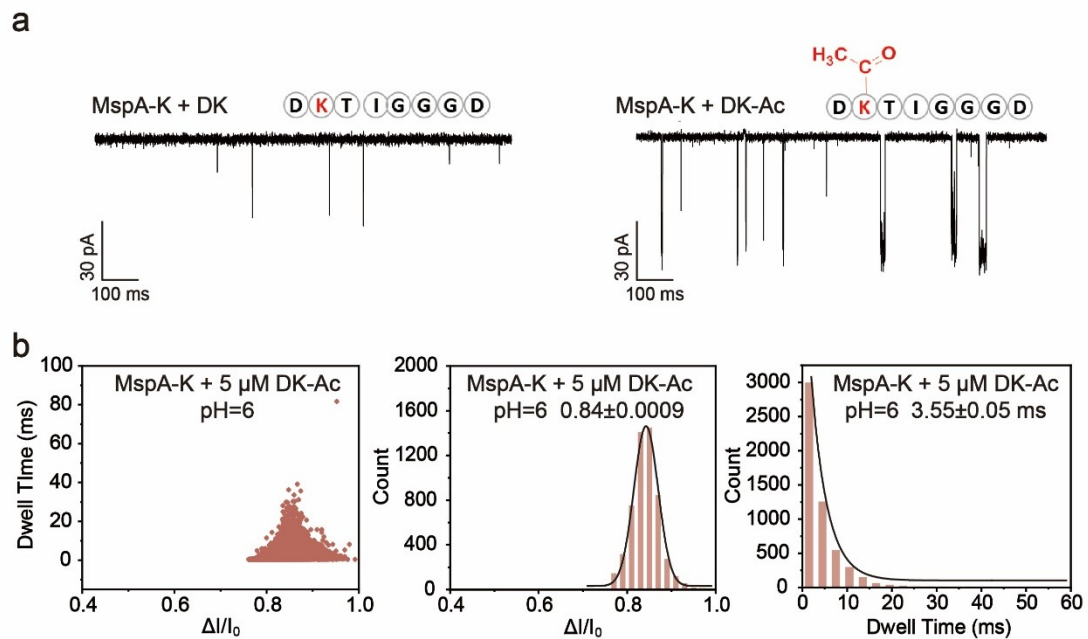

**Figure S48.** (a) Representative current traces of DK and DK-Ac with MspA-K. The measurements were carried out in the buffer of 1.0 M NaCl, 10.0 mM HEPES, pH 6.0. All peptides were added to a final concentration of 5.0  $\mu$ M. (b) Scatter plot of  $\Delta I/I_0$ , histogram of  $\Delta I/I_0$  and dwell time histogram for DK-Ac interactions with MspA-K at an applied potential of +50 mV.

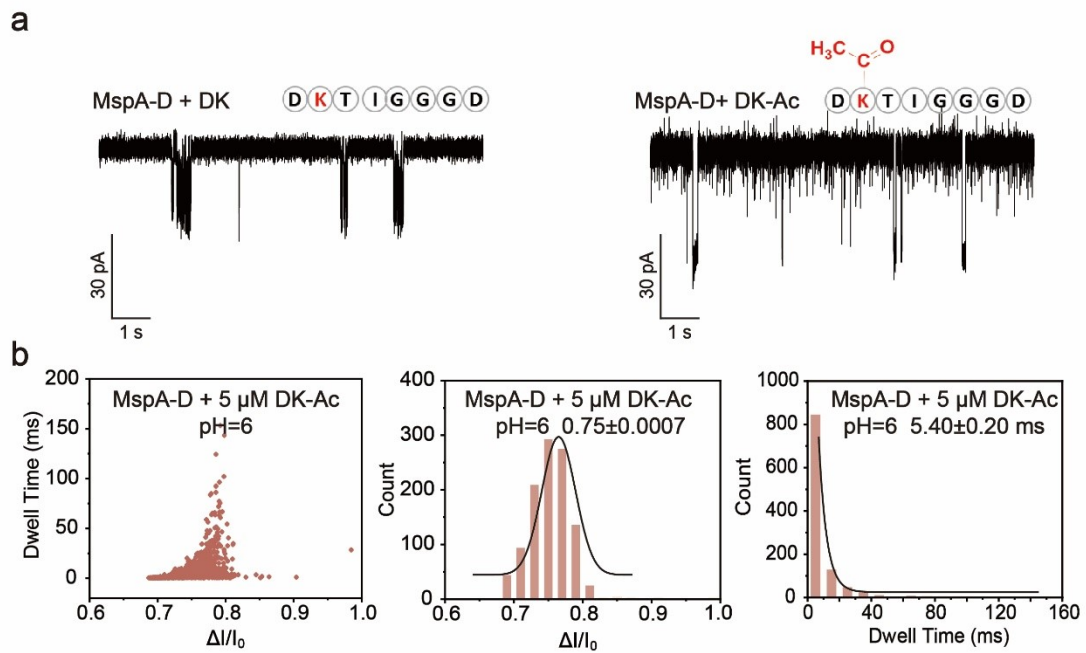

**Figure S49.** (a) Representative current traces of DK and DK-Ac with MspA-D. The measurements were carried out in the buffer of 1.0 M NaCl, 10.0 mM HEPES, pH 6.0. All peptides were added to a final concentration of 5.0  $\mu$ M. (b) Scatter plot of  $\Delta I/I_0$ , histogram of  $\Delta I/I_0$  and dwell time histogram for DK-Ac interactions with MspA-D at an applied potential of +50 mV.

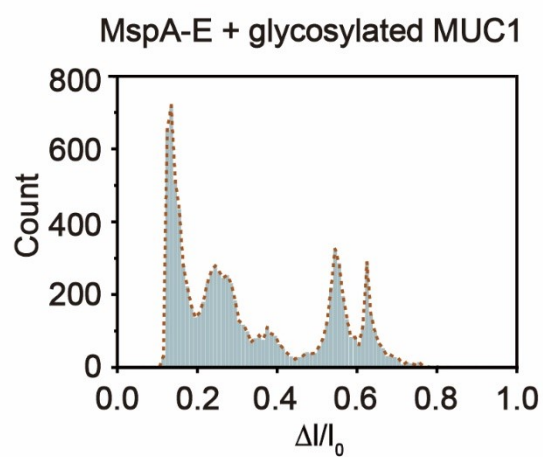

**Figure S50.** The histogram of  $\Delta I/I_0$  for glycosylated MUC1 following tryptic digestion, as detected with the MspA-E nanopore. The measurements were carried out in the buffer of 1.0 M NaCl, 10.0 mM HEPES, pH 9.0, at an applied potential of +50 mV.

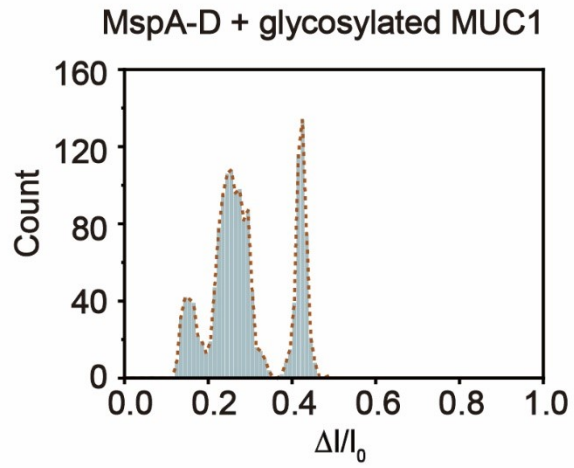

**Figure S51.** The histogram of  $\Delta I/I_0$  for glycosylated MUC1 following tryptic digestion, as detected with the MspA-D nanopore. The measurements were carried out in the buffer of 1.0 M NaCl, 10.0 mM HEPES, pH 9.0, at an applied potential of +50 mV.

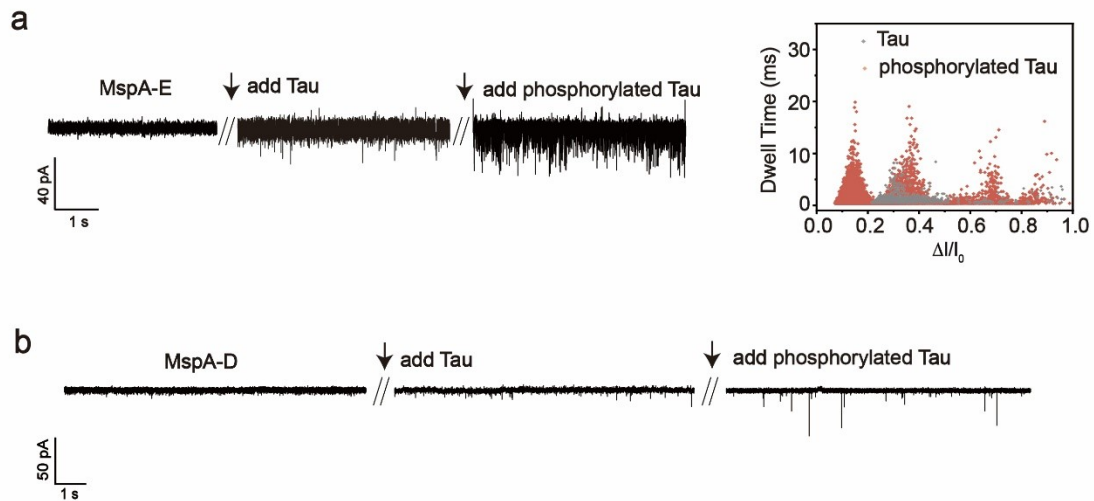

**Figure S52.** (a) Representative current traces of tryptic digested Tau and phosphorylated Tau protein with the MspA-E nanopore(left). Scatter plot of  $\Delta I/I_0$  with the addition of tryptic digested Tau and phosphorylated Tau protein (right). (b) Representative current traces of tryptic digested Tau and phosphorylated Tau protein with the MspA-D nanopore. The measurements were carried out in the buffer of 1.0 M NaCl, 10.0 mM HEPES, pH 7.4, at an applied potential of +50 mV.

## Supplemental Tables

**Table S1.** Mutation sites of the MspA protein.

| Name    | Mutation Site                    |
|---------|----------------------------------|
| M2 MspA | D93N/D91N/D90N/D118R/D134R/E139K |
| MspA-Q  | D93N/N91Q/D90N/D118R/D134R/E139K |
| MspA-H  | D93N/N91H/D90N/D118R/D134R/E139K |
| MspA-K  | D93N/N91K/D90N/D118R/D134R/E139K |
| MspA-R  | D93N/N91R/D90N/D118R/D134R/E139K |
| MspA-D  | D93N/N91D/D90N/D118R/D134R/E139K |
| MspA-E  | D93N/N91E/D90N/D118R/D134R/E139K |
| MspA-F  | D93N/N91F/D90N/D118R/D134R/E139K |
| MspA-W  | D93N/N91W/D90N/D118R/D134R/E139K |

**Table S2.** Peptide sequence and pH value of electrolyte. Peptide sequence displayed from the N-terminus (left) to the C-terminus (right). Amino acid residues harboring post-translational modifications (PTMs) and their specific modifying groups were marked in red. Phosphorylation, methylation, acetylation, glycosylation, crotonylation, succinylation, nitration and sulfonation were abbreviated as p, Me, Ac, GalNAc, cr, succ, n and s. The nanopore measurements were performed in 1 M NaCl and 10 mM HEPES buffer.

|    | Name      | Peptide sequences               | The pH of measurement buffer |
|----|-----------|---------------------------------|------------------------------|
| 1  | HY        | HYPIAPSYYPYK                    | 7.4                          |
| 2  | HY-3p     | H(Y-p)PIAPS(Y-p)P(Y-p)PK        | 7.4                          |
| 3  | HY-2p     | HYPIAPS(Y-p)P(Y-p)PK            | 7.4                          |
| 4  | HY-1p     | H(Y-p)PIAPSYYPYK                | 7.4                          |
| 5  | HD        | HDPIAPSDPDPK                    | 7.4                          |
| 6  | ET        | TPPAPETPPSSGEPPE                | 7.4                          |
| 7  | QT        | TPPAPQTPSSGEPQ                  | 7.4                          |
| 8  | KT        | TPPAPKTPSSGEPK                  | 7.4                          |
| 9  | ET-p      | TPPAPE(T-p)PPSSGEPPE            | 7.4                          |
| 10 | QT-p      | TPPAPQ(T-p)PPSSGEPQ             | 7.4                          |
| 11 | KT-p      | TPPAPK(T-p)PPSSGEPK             | 7.4                          |
| 12 | MK        | MARTKQTA                        | 12                           |
| 13 | MK-Me     | MART(K-Me)QTA                   | 12                           |
| 14 | DK        | DKTIGGGD                        | 6                            |
| 15 | DK-Ac     | D(K-Ac)TIGGGD                   | 6                            |
| 16 | ST        | SAPDTRPAP                       | 9                            |
| 17 | ST-GalNAc | SAPD(T- $\alpha$ -D-GalNAc)RPAP | 9                            |
| 18 | PD        | PTSGSAYEMQTKIDDD                | 7.4                          |
| 19 | PD-p      | PT(S-p)GSAYEMQTKIDDD            | 7.4                          |
| 20 | PD-Me     | PT(S-Me)GSAYEMQTKIDDD           | 7.4                          |
| 21 | PD-Ac     | PT(S-Ac)GSAYEMQTKIDDD           | 7.4                          |

|    |            |                                        |     |
|----|------------|----------------------------------------|-----|
| 22 | PD- GalNAc | PT(S- $\alpha$ -D-GalNAc)GSAYEMQTKIDDD | 7.4 |
| 23 | PD-cr      | PTSGSAYEMQT(K-cr)IDDD                  | 7.4 |
| 24 | PD-succ    | PTSGSAYEMQT(K-succ)IDDD                | 7.4 |
| 25 | PD-n       | PTSGSA(Y-n)EMQTKIDDD                   | 7.4 |
| 26 | PD-s       | PTSGSA(Y-s)EMQTKIDDD                   | 7.4 |

**Table S3.**  $\Delta I/I_0$  and dwell time of KT, KT-p, QT, QT-p, ET and ET-p.

|         |                 | KT          | KY-p        | QT         | QT-p        | ET | ET-p        |
|---------|-----------------|-------------|-------------|------------|-------------|----|-------------|
| M2 MspA | $\Delta I/I_0$  | /           | /           | /          | /           | /  | 0.78±0.0005 |
|         | dwell time (ms) | /           | /           | /          | /           | /  | 27.64±1.12  |
| MspA-Q  | $\Delta I/I_0$  | /           | /           | /          | /           | /  | /           |
|         | dwell time (ms) | /           | /           | /          | /           | /  | /           |
| MspA-K  | $\Delta I/I_0$  | 0.65±0.003  | 0.59±0.0006 | 0.12±0.009 | 0.23±0.001  |    | 0.29±0.0007 |
|         | dwell time (ms) | 4.48±0.43   | 9.82±0.06   | 1.53±0.12  | 0.71±0.01   | /  | 2.57±0.096  |
| MspA-D  | $\Delta I/I_0$  | 0.12±0.0005 | 0.14±0.002  | 0.42±0.002 | 0.42±0.0005 | /  | /           |
|         | dwell time (ms) | 0.13±0.008  | 2.90±0.13   | 3.93±0.13  | 17.16±0.65  | /  | /           |
| MspA-E  | $\Delta I/I_0$  | 0.29±0.003  | 0.51±0.004  | 0.55±0.007 | 0.72±0.001  | /  | 0.40±0.002  |
|         | dwell time (ms) | 0.52±0.004  | 15.66±1.57  | 0.71±0.015 | 35.79±5.43  | /  | 0.75±0.008  |
| MspA-H  | $\Delta I/I_0$  | /           | /           | /          | /           | /  | /           |
|         | dwell time (ms) | /           | /           | /          | /           | /  | /           |
| MspA-W  | $\Delta I/I_0$  | /           | /           | /          | /           | /  | /           |
|         | dwell time (ms) | /           | /           | /          | /           | /  | /           |
| MspA-F  | $\Delta I/I_0$  | /           | /           | /          | /           | /  | /           |
|         | dwell time (ms) | /           | /           | /          | /           | /  | /           |

**Table S4.** Validation and testing accuracies of different models for MspA-K. The dataset was then split into a training set (90%) and a testing set (10%) for model training and testing. All models were trained using the Classification Learner toolbox in MATLAB. The validation accuracies were derived from the 10-fold cross-validation results. The Bagged Trees model reported the best score, which is marked in red.

|    | Model Name             | Model Type     | Accuracy (Validation) | Accuracy (Test) |
|----|------------------------|----------------|-----------------------|-----------------|
| 1  | Fine Tree              | Tree           | 97.8 %                | 97.8 %          |
| 2  | Medium Tree            | Tree           | 97.4 %                | 97.8 %          |
| 3  | Coarse Tree            | Tree           | 81.9 %                | 81.9 %          |
| 4  | Linear Discriminant    | Discriminant   | 95.2 %                | 96.2 %          |
| 5  | Quadratic Discriminant | Discriminant   | 96.6 %                | 97.3 %          |
| 6  | Gaussian Naive Bayes   | Naive Bayes    | 96.1 %                | 96.7 %          |
| 7  | Kernel Naive Bayes     | Naive Bayes    | 96.0 %                | 96.1 %          |
| 8  | Linear SVM             | SVM            | 97.4 %                | 98.2 %          |
| 9  | Quadratic SVM          | SVM            | 97.9 %                | 98.5 %          |
| 10 | Fine Gaussian SVM      | SVM            | 97.0 %                | 97.6 %          |
| 11 | Medium Gaussian SVM    | SVM            | 97.9 %                | 98.3 %          |
| 12 | Coarse Gaussian SVM    | SVM            | 97.0 %                | 97.9 %          |
| 13 | Fine KNN               | KNN            | 95.8 %                | 96.4 %          |
| 14 | Medium KNN             | KNN            | 95.4 %                | 95.8 %          |
| 15 | Coarse KNN             | KNN            | 89.5 %                | 90.8 %          |
| 16 | Cosine KNN             | KNN            | 86.9 %                | 88.0 %          |
| 17 | Cubic KNN              | KNN            | 95.2 %                | 95.4 %          |
| 18 | Weighted KNN           | KNN            | 96.1 %                | 96.3 %          |
| 19 | Boosted Trees          | Ensemble       | 97.7 %                | 98.0 %          |
| 20 | Bagged Trees           | Ensemble       | 98.2 %                | 98.3 %          |
| 21 | Subspace Discriminant  | Ensemble       | 92.3 %                | 94.0 %          |
| 22 | Subspace KNN           | Ensemble       | 90.0 %                | 90.7 %          |
| 23 | RUSBoosted Trees       | Ensemble       | 97.6 %                | 98.1 %          |
| 24 | Narrow Neural Network  | Neural Network | 97.8 %                | 98.1 %          |
| 25 | Medium Neural          | Neural Network | 97.9 %                | 98.4 %          |
| 26 | Wide Neural Network    | Neural Network | 97.8 %                | 98.4 %          |
| 27 | Bilayered Neural       | Neural Network | 98.0 %                | 98.6 %          |
| 28 | Trilayered Neural      | Neural Network | 97.9 %                | 98.2 %          |
| 29 | SVM Kernel             | Kernel         | 95.3 %                | 95.6 %          |
| 30 | Logistic Regression    | Kernel         | 94.3 %                | 94.8 %          |

**Table S5.** Validation and testing accuracies of different models for MspA-E. The dataset was then split into a training set (90%) and a testing set (10%) for model training and testing. All models were trained using the Classification Learner toolbox in MATLAB. The validation accuracies were derived from the 10-fold cross-validation results. The Bagged Trees model reported the best score, which is marked in red.

|    | Model Name             | Model Type     | Accuracy (Validation) | Accuracy (Test) |
|----|------------------------|----------------|-----------------------|-----------------|
| 1  | Fine Tree              | Tree           | 97.6 %                | 97.9 %          |
| 2  | Medium Tree            | Tree           | 96.4 %                | 97.1 %          |
| 3  | Coarse Tree            | Tree           | 81.6 %                | 83.5 %          |
| 4  | Linear Discriminant    | Discriminant   | 92.0 %                | 92.6 %          |
| 5  | Quadratic Discriminant | Discriminant   | 94.0 %                | 94.5 %          |
| 6  | Gaussian Naive Bayes   | Naive Bayes    | 93.2 %                | 93.9 %          |
| 7  | Kernel Naive Bayes     | Naive Bayes    | 96.7 %                | 96.7 %          |
| 8  | Linear SVM             | SVM            | 95.3 %                | 96.6 %          |
| 9  | Quadratic SVM          | SVM            | 96.1 %                | 96.5 %          |
| 10 | Fine Gaussian SVM      | SVM            | 95.8 %                | 95.8 %          |
| 11 | Medium Gaussian SVM    | SVM            | 96.2 %                | 96.6 %          |
| 12 | Coarse Gaussian SVM    | SVM            | 95.4 %                | 96.3 %          |
| 13 | Fine KNN               | KNN            | 95.5 %                | 95.8 %          |
| 14 | Medium KNN             | KNN            | 95.2 %                | 96.0 %          |
| 15 | Coarse KNN             | KNN            | 92.3 %                | 93.0 %          |
| 16 | Cosine KNN             | KNN            | 93.8 %                | 94.3 %          |
| 17 | Cubic KNN              | KNN            | 95.2 %                | 96.0 %          |
| 18 | Weighted KNN           | KNN            | 95.8 %                | 96.5 %          |
| 19 | Boosted Trees          | Ensemble       | 97.0 %                | 98.0 %          |
| 20 | Bagged Trees           | Ensemble       | 97.9 %                | 98.2 %          |
| 21 | Subspace Discriminant  | Ensemble       | 86.3 %                | 85.1 %          |
| 22 | Subspace KNN           | Ensemble       | 92.0 %                | 90.6 %          |
| 23 | RUSBoosted Trees       | Ensemble       | 97.2 %                | 97.3 %          |
| 24 | Narrow Neural Network  | Neural Network | 96.9 %                | 98.2 %          |
| 25 | Medium Neural          | Neural Network | 97.0 %                | 97.9 %          |
| 26 | Wide Neural Network    | Neural Network | 96.9 %                | 97.4 %          |
| 27 | Bilayered Neural       | Neural Network | 97.1 %                | 98.0 %          |
| 28 | Trilayered Neural      | Neural Network | 96.8 %                | 97.9 %          |
| 29 | SVM Kernel             | Kernel         | 94.6 %                | 94.7 %          |
| 30 | Logistic Regression    | Kernel         | 93.9 %                | 93.3 %          |

**Table S6.** Analysis of the interaction energy between PD (the peptide sequence is PTSGSAYEMQTKIDDD) and MspA-K using molecular docking.

| Name                       | Distance | Category      | Type                       |
|----------------------------|----------|---------------|----------------------------|
| B:ASN93:N - ligand:O137    | 3.03416  | Hydrogen Bond | Conventional Hydrogen Bond |
| C:ASN102:ND2 - ligand:O144 | 3.36078  | Hydrogen Bond | Conventional Hydrogen Bond |
| ligand:H17 - H:ASN102:O    | 2.35263  | Hydrogen Bond | Conventional Hydrogen Bond |
| ligand:H69 - E:LYS91:O     | 2.76622  | Hydrogen Bond | Conventional Hydrogen Bond |
| ligand:H89 - D:ASN102:O    | 2.49718  | Hydrogen Bond | Conventional Hydrogen Bond |
| ligand:H90 - C:LYS91:O     | 2.7119   | Hydrogen Bond | Conventional Hydrogen Bond |
| ligand:H130 - B:SER103:OG  | 2.11737  | Hydrogen Bond | Conventional Hydrogen Bond |
| ligand:H140 - B:LYS91:O    | 2.67342  | Hydrogen Bond | Conventional Hydrogen Bond |
| F:SER103:OG - ligand       | 4.09166  | Hydrogen Bond | Pi-Donor Hydrogen Bond     |

**Table S7.** Analysis of the interaction energy between PD-p (the peptide sequence is PT(S-p)GSAYEMQTKIDDD) and MspA-K using molecular docking.

| Name                         | Distance | Category      | Type                       |
|------------------------------|----------|---------------|----------------------------|
| B:ASN93:N - d:ligand:O21     | 3.19943  | Hydrogen Bond | Conventional Hydrogen Bond |
| C:ASN93:N - d:ligand:O22     | 3.27526  | Hydrogen Bond | Conventional Hydrogen Bond |
| E:LYS91:NZ - d:ligand:O12    | 3.36267  | Hydrogen Bond | Conventional Hydrogen Bond |
| H:ASN102:ND2 - d:ligand:O43  | 3.20311  | Hydrogen Bond | Conventional Hydrogen Bond |
| d:ligand:O23 - A:ASN102:OD1  | 3.25526  | Hydrogen Bond | Conventional Hydrogen Bond |
| d:ligand:O50 - H:ASN102:O    | 2.92943  | Hydrogen Bond | Conventional Hydrogen Bond |
| d:ligand:O61 - G:LYS91:O     | 3.36143  | Hydrogen Bond | Conventional Hydrogen Bond |
| d:ligand:O61 - H:ASN102:O    | 3.208    | Hydrogen Bond | Conventional Hydrogen Bond |
| d:ligand:2H17 - D:ASN102:O   | 2.26411  | Hydrogen Bond | Conventional Hydrogen Bond |
| d:ligand:3H17 - C:LYS91:O    | 2.48761  | Hydrogen Bond | Conventional Hydrogen Bond |
| d:ligand:3H17 - D:SER103:OG  | 2.79887  | Hydrogen Bond | Conventional Hydrogen Bond |
| d:ligand:4H21 - B:LYS91:O    | 2.57307  | Hydrogen Bond | Conventional Hydrogen Bond |
| d:ligand:8H21 - B:ASN102:OD1 | 2.25343  | Hydrogen Bond | Conventional Hydrogen Bond |
| d:ligand:8H22 - C:ASN102:O   | 2.85048  | Hydrogen Bond | Conventional Hydrogen Bond |
| d:ligand:2H23 - C:LYS91:O    | 2.13196  | Hydrogen Bond | Conventional Hydrogen Bond |
| d:ligand:H44 - H:LYS91:O     | 2.30103  | Hydrogen Bond | Conventional Hydrogen Bond |
| d:ligand:H88 - G:ASN102:O    | 2.54972  | Hydrogen Bond | Conventional Hydrogen Bond |
| d:ligand:H88 - F:LYS91:O     | 2.20945  | Hydrogen Bond | Conventional Hydrogen Bond |
| d:ligand:H98 - G:LYS91:O     | 2.56875  | Hydrogen Bond | Conventional Hydrogen Bond |
| A:GLY92:CA - d:ligand:O23    | 3.43596  | Hydrogen Bond | Carbon Hydrogen Bond       |
| A:SER103:CB - d:ligand:O23   | 3.73074  | Hydrogen Bond | Carbon Hydrogen Bond       |
| B:GLY92:CA - d:ligand:O21    | 3.32017  | Hydrogen Bond | Carbon Hydrogen Bond       |
| H:SER103:CB - d:ligand:O50   | 3.59117  | Hydrogen Bond | Carbon Hydrogen Bond       |
| d:ligand:C59 - H:ASN102:O    | 3.39058  | Hydrogen Bond | Carbon Hydrogen Bond       |
| d:ligand:C11 - E:LYS91       | 3.86796  | Hydrophobic   | Alkyl                      |

**Table S8.** Analysis of the interaction energy between PD-cr (the peptide sequence is PTSGSAYEMQT(K-cr)IDDD) and MspA-K using molecular docking.

| Name                        | Distance | Categroy      | Type                       |
|-----------------------------|----------|---------------|----------------------------|
| A:LYS91:NZ - d:ligand:O72   | 3.31371  | Hydrogen Bond | Conventional Hydrogen Bond |
| F:ASN93:N - d:ligand:O22    | 3.15841  | Hydrogen Bond | Conventional Hydrogen Bond |
| d:ligand:5H10 - A:SER103:OG | 2.97859  | Hydrogen Bond | Conventional Hydrogen Bond |
| d:ligand:8H13 - H:ASN102:O  | 2.02827  | Hydrogen Bond | Conventional Hydrogen Bond |
| d:ligand:9H13 - G:LYS91:O   | 2.19619  | Hydrogen Bond | Conventional Hydrogen Bond |
| d:ligand:7H21 - E:LYS91:O   | 2.09235  | Hydrogen Bond | Conventional Hydrogen Bond |
| d:ligand:1H23 - G:ASN102:O  | 2.36592  | Hydrogen Bond | Conventional Hydrogen Bond |
| d:ligand:H58 - D:ASN102:O   | 2.31379  | Hydrogen Bond | Conventional Hydrogen Bond |
| d:ligand:H64 - C:LYS91:O    | 2.78346  | Hydrogen Bond | Conventional Hydrogen Bond |
| B:SER103:CB - d:ligand:O80  | 3.48453  | Hydrogen Bond | Carbon Hydrogen Bond       |

**Table S9.** The sequence of MUC1. Due to the restriction of trypsin activity by the proline (Pro) heterocyclic structure in the MUC1 sequence (especially at KP or RP sites), cleavage occurs at only three specific sites (indicated in red).

| The sequence of MUC1                                                                                                                                                                                                                                                                                                                                                                                                           |
|--------------------------------------------------------------------------------------------------------------------------------------------------------------------------------------------------------------------------------------------------------------------------------------------------------------------------------------------------------------------------------------------------------------------------------|
| MTPGTQSPFFLLLLLVLTVVVTGSGHASSTPGGEKETSATQRSSVPSSTEKNAVSMTSSVLSSHSPGSGSSTTQGQDVTLAPATEPAS<br>GSAATWGQDVTSVPVTRPALGSTTPPAHDVTSAPDNKPAPGSTAPPAHGVTSA PDTRPAPGSTAPPAHGVTSA PDTRPAPGSTAP<br>PAHGVTSA PDTRPAPGSTAPPAHGVTSA PDTRPAPGSTAPPAHGVTSA PDTRPAPGSTAPPAHGVTSA PDTRPAPGSTAPPAHG<br>TSAPDTRPAPGSTAPPAHGVTSA PDTRPAPGSTAPPAHGVTSA PDTRPAPGSTAPPAHGVTSA PDTRPAPGSTAPPAHGVTSA PD<br>RPAPGSTAPPAHGVTSA PDTRPAPGSTAPPAHGVTSGSHHHHHH* |

## Supplemental Data

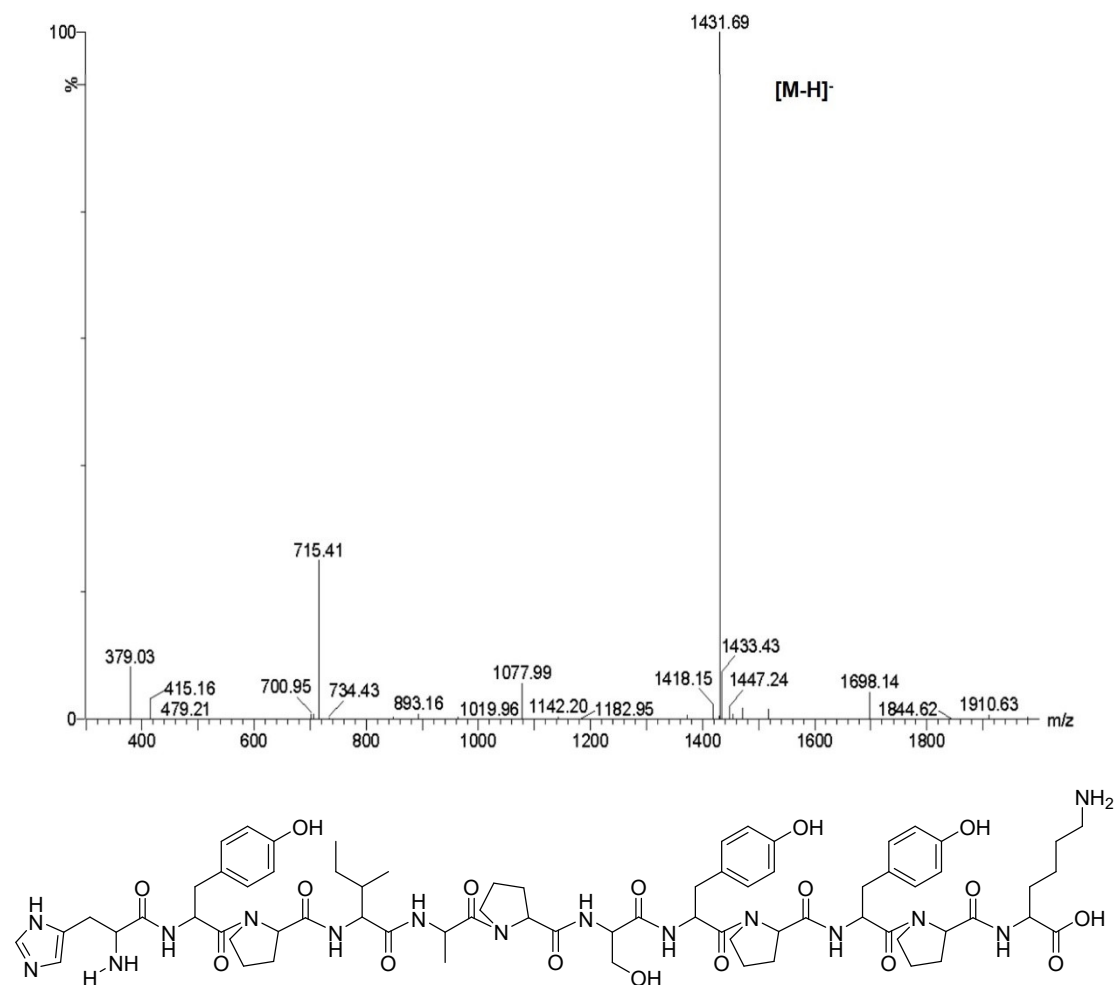

**Figure S53.** MS analysis of the peptide HYPIAPSYPPK (termed HY). m/z: 1432.65 (100.0%). MS (ESI) m/z: [M-H]<sup>-</sup> calcd, 1431.65; found, 1431.69. [M-2H]<sup>2-</sup> calcd, 715.33; found, 715.41.

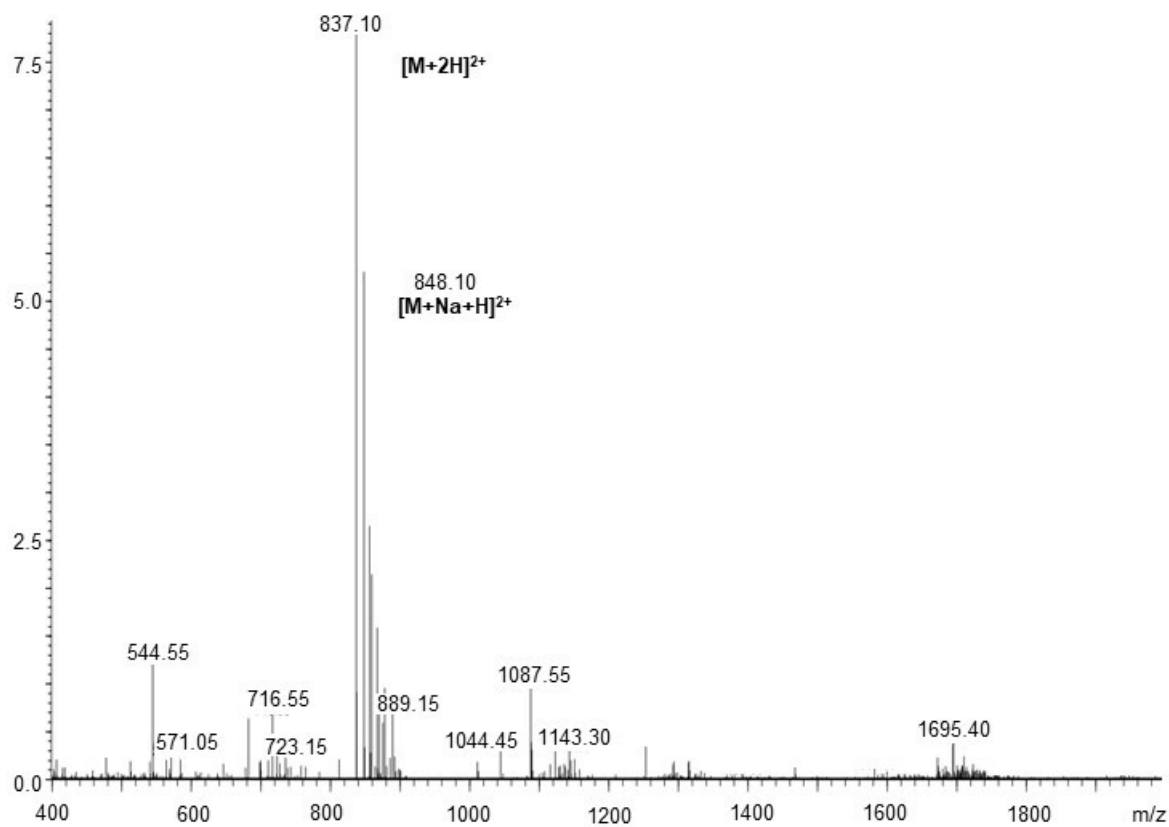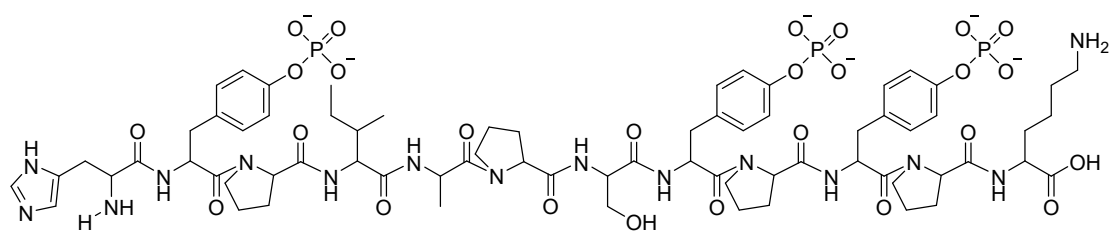

**Figure S54.** Mass spectrometry of the peptide H(Y-p)PIAPS(Y-p)P(Y-p)PK (termed HY-3p). m/z: 1672.55 (100.0%). MS (ESI) m/z: [M+2H]<sup>2+</sup> calcd, 837.28; found, 837.10.

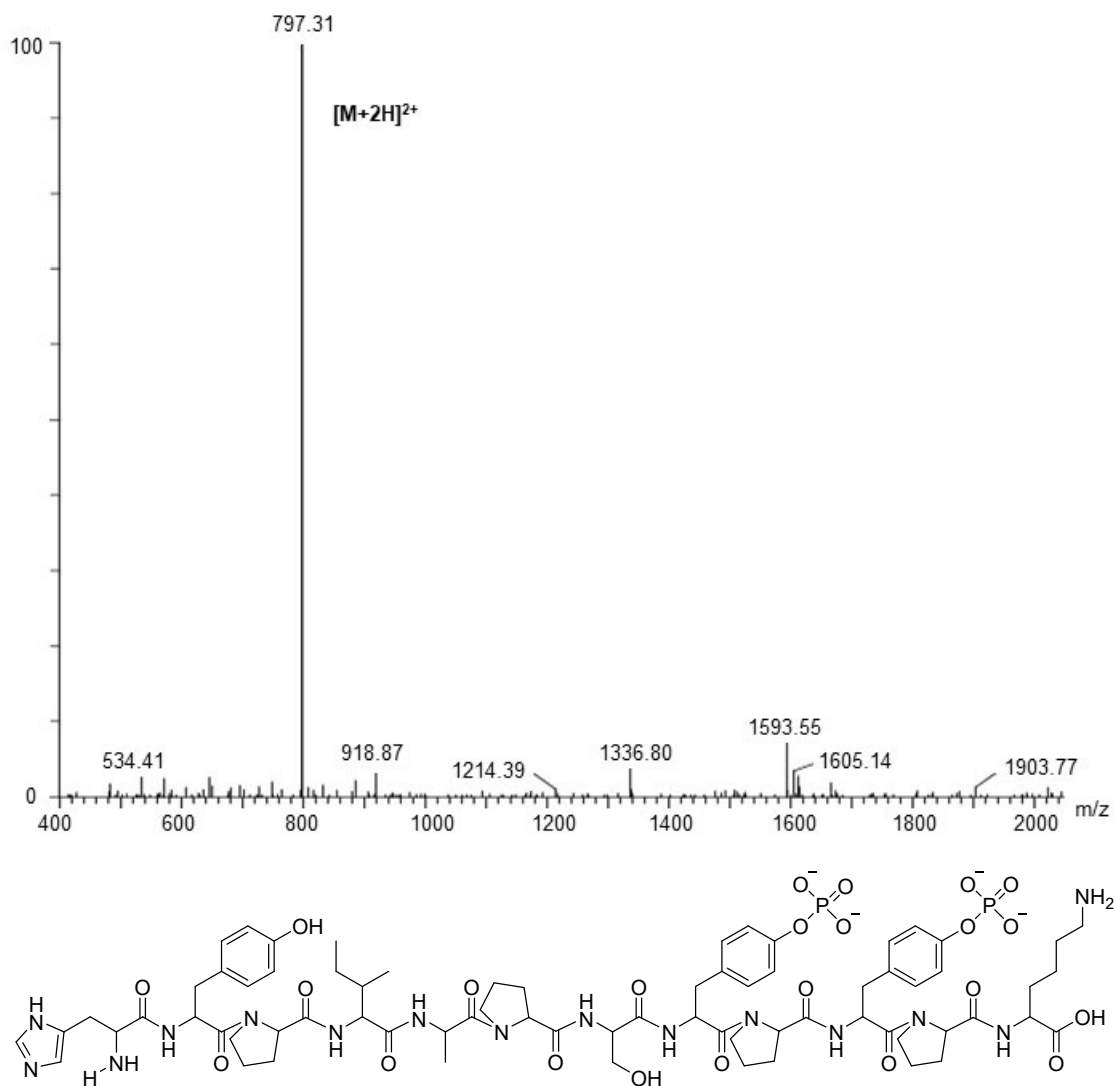

**Figure S55.** Mass spectrometry of the peptide HYPIAPS(Y-p)P(Y-p)PK (termed HY-2p). m/z: 1593.60 (100.0%). MS (ESI) m/z:  $[M+2H]^{2+}$  calcd, 797.80; found, 797.31.

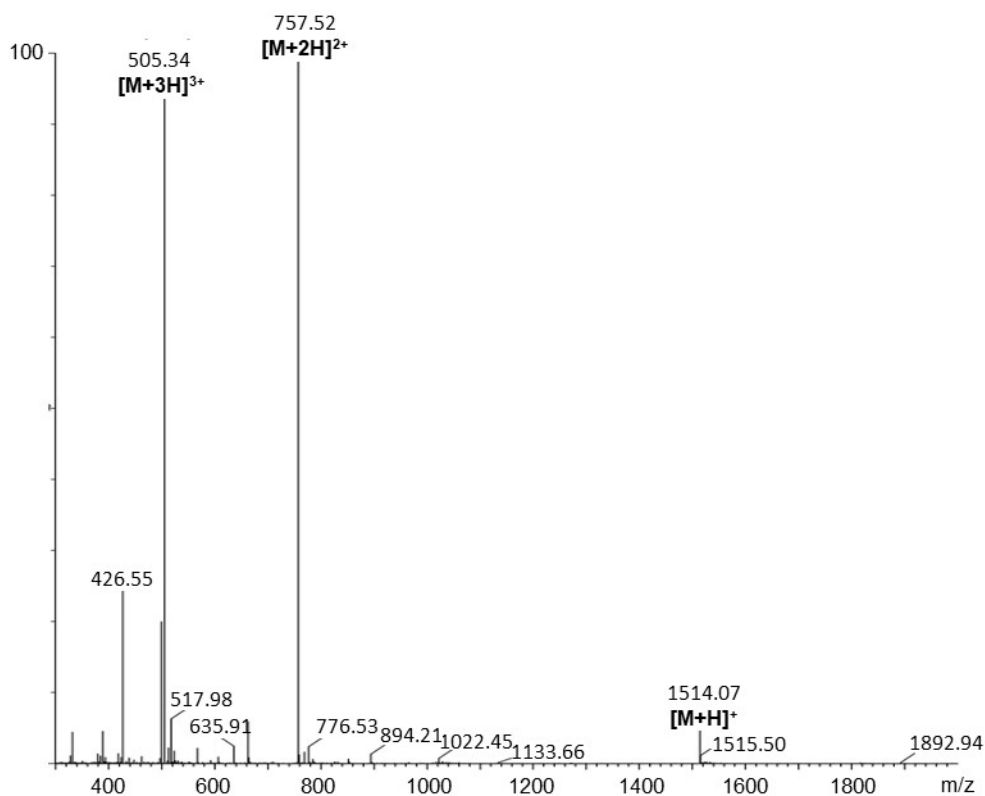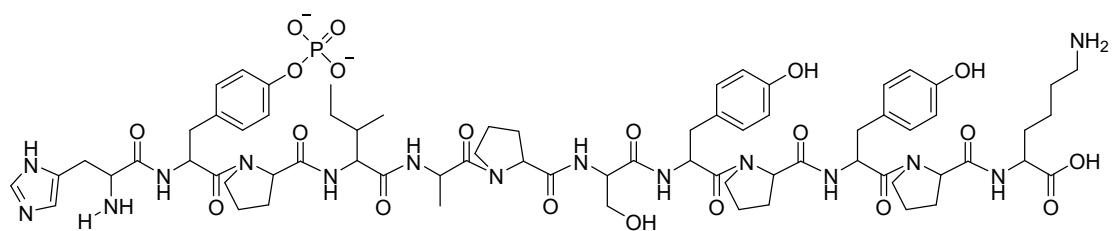

**Figure S56.** Mass spectrometry of the peptide H(Y-p)PIAPSYPPK (termed HY-1p). m/z: 1512.64 (100.0%). MS (ESI) m/z: [M+H]<sup>+</sup> calcd, 1513.64; found, 1514.07. [M+2H]<sup>2+</sup> calcd, 757.32; found, 757.52. [M+3H]<sup>3+</sup> calcd, 505.21; found, 505.34.

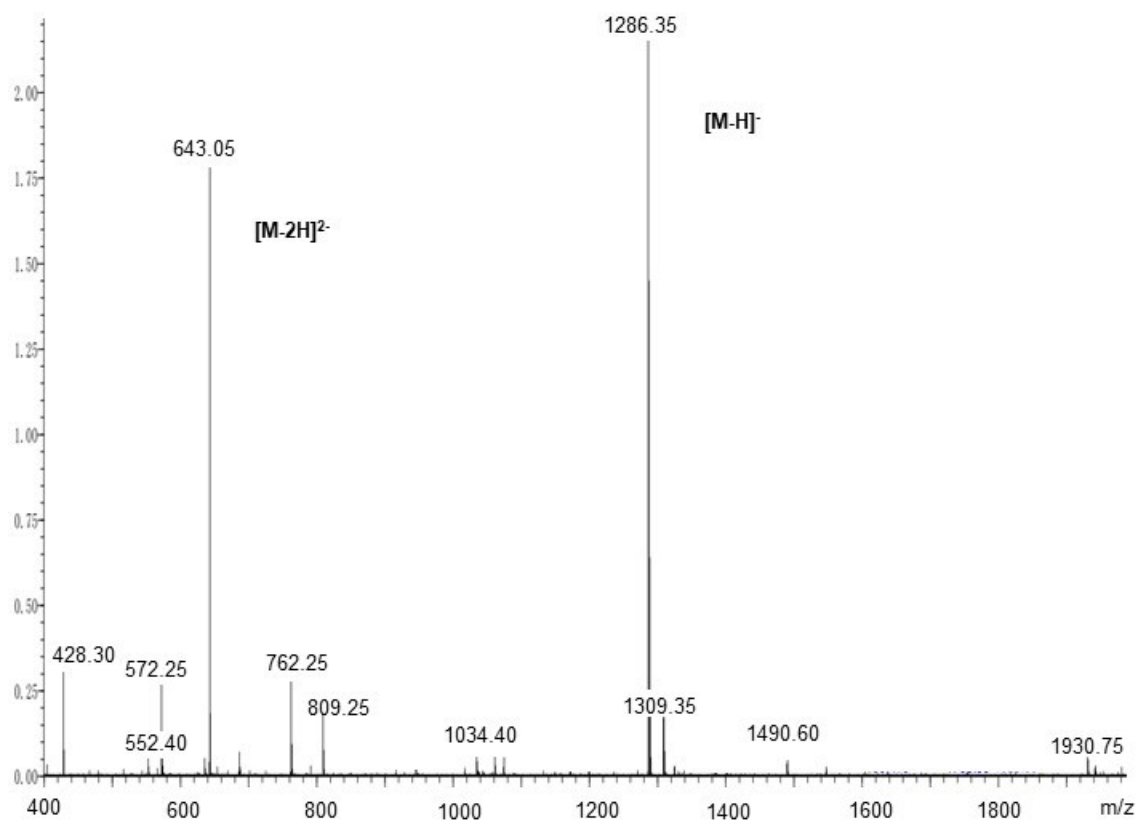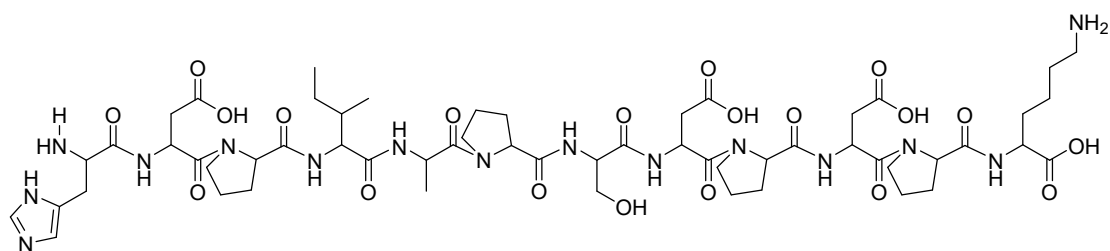

**Figure S57.** Mass spectrometry of the peptide HDPIAPSDDPK (termed HD). m/z: 1288.38 (100.0%). MS (ESI) m/z: [M-H]<sup>-</sup> calcd, 1287.38; found, 1286.35. [M-2H]<sup>2-</sup> calcd, 643.19; found, 643.05.

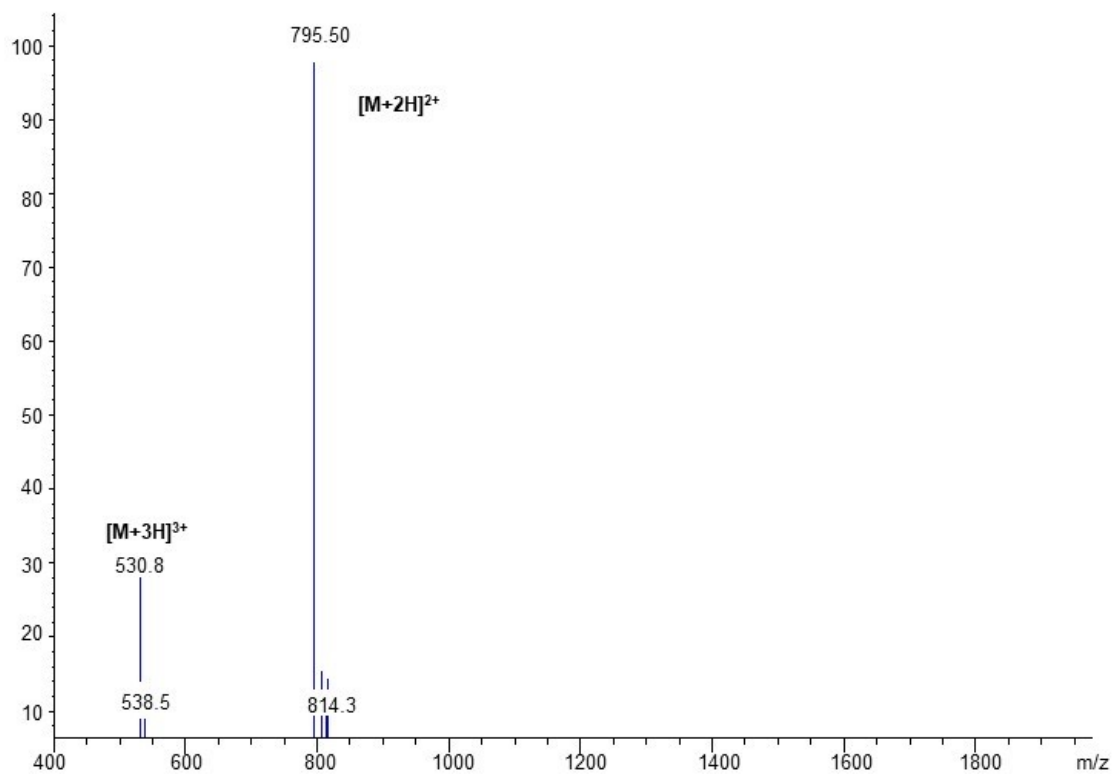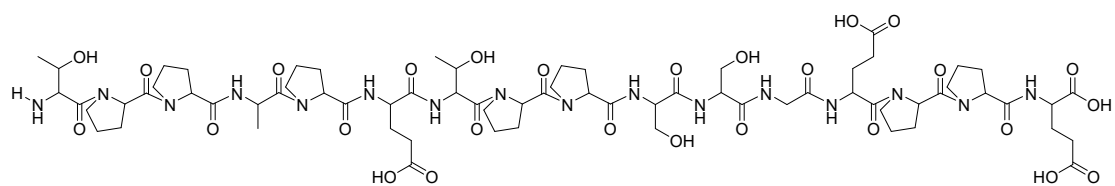

**Figure S58.** Mass spectrometry of the peptide TPPAPETPPSSGEPPE (termed ET). m/z: 1589.65 (100.0%). MS (ESI) m/z:  $[M+2H]^{2+}$  calcd, 795.83; found, 795.50.  $[M+3H]^{3+}$  calcd, 530.87; found, 530.80.

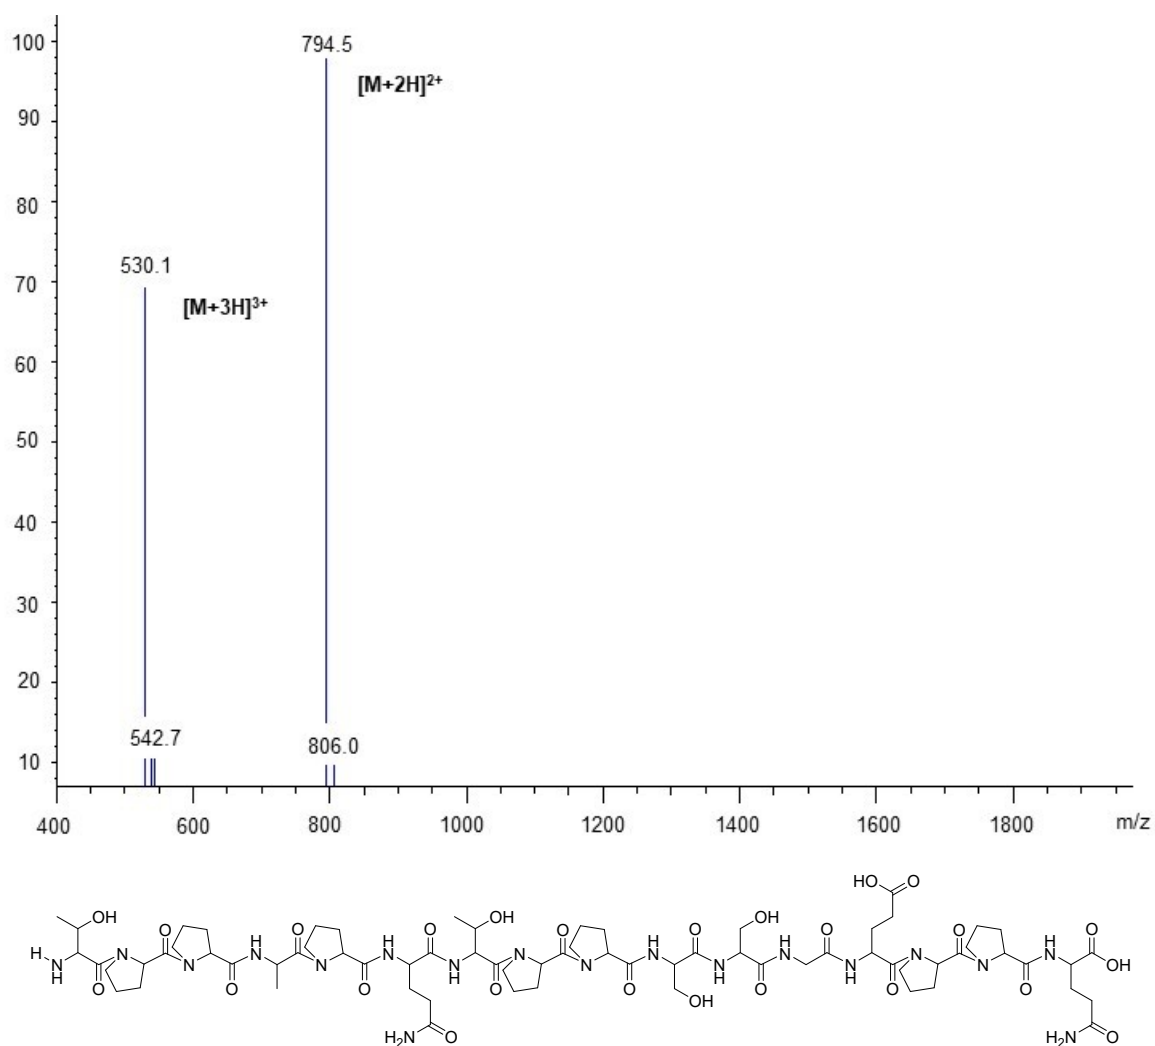

**Figure S59.** Mass spectrometry of the peptide TPPAPQTPSSGEPQ (termed QT). m/z: 1587.68 (100.0%). MS (ESI) m/z:  $[M+2H]^{2+}$  calcd, 794.84; found, 794.50.  $[M+3H]^{3+}$  calcd, 530.23; found, 530.10.

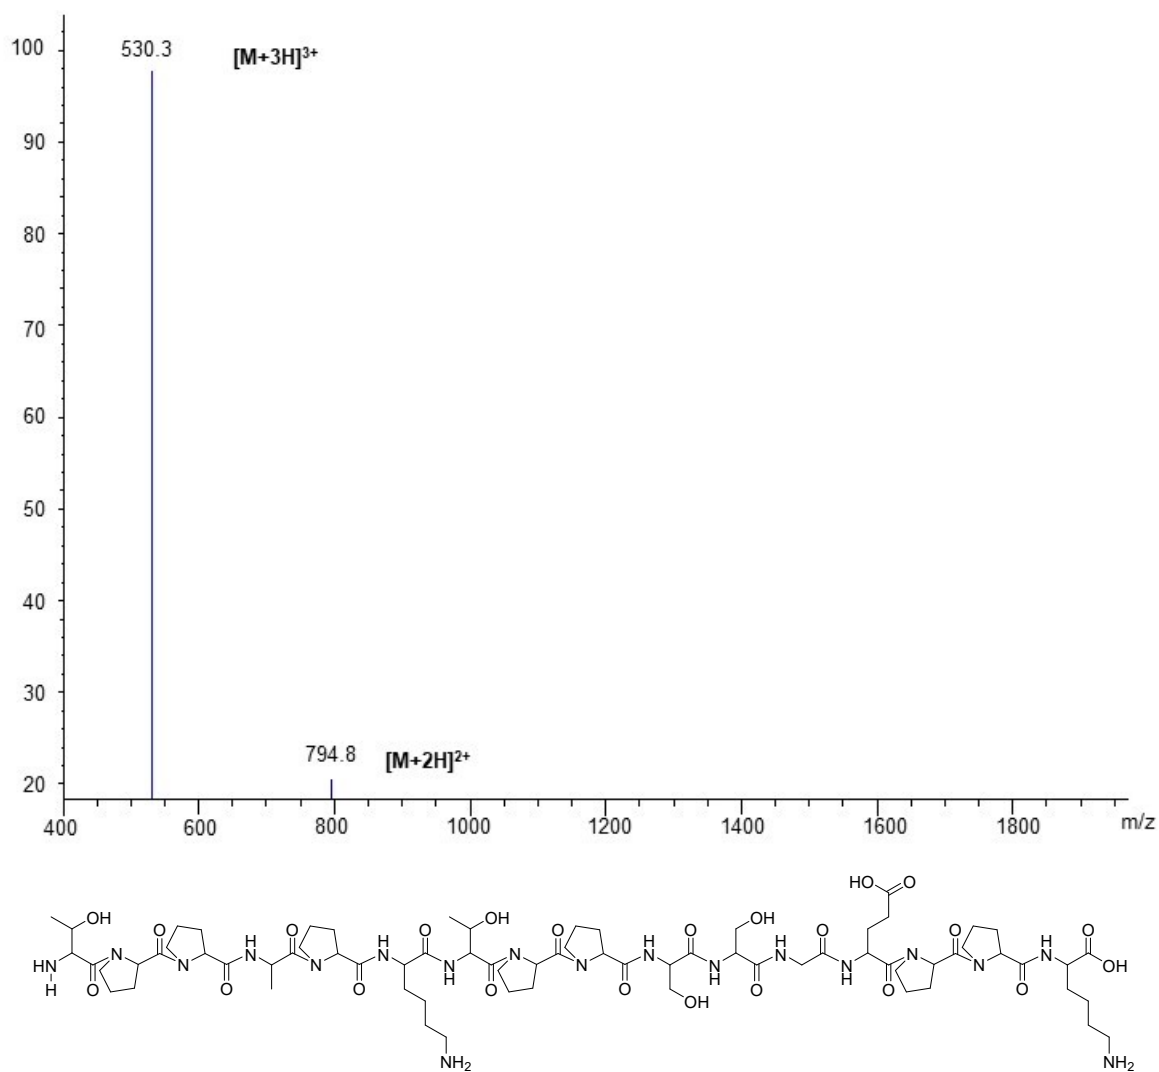

**Figure S60.** Mass spectrometry of the peptide TPPAPKTPSSGEPK (termed KT). m/z: 1587.77 (100.0%). MS (ESI) m/z:  $[M+2H]^{2+}$  calcd, 794.89; found, 794.80.  $[M+3H]^{3+}$  calcd, 530.26; found, 530.30.

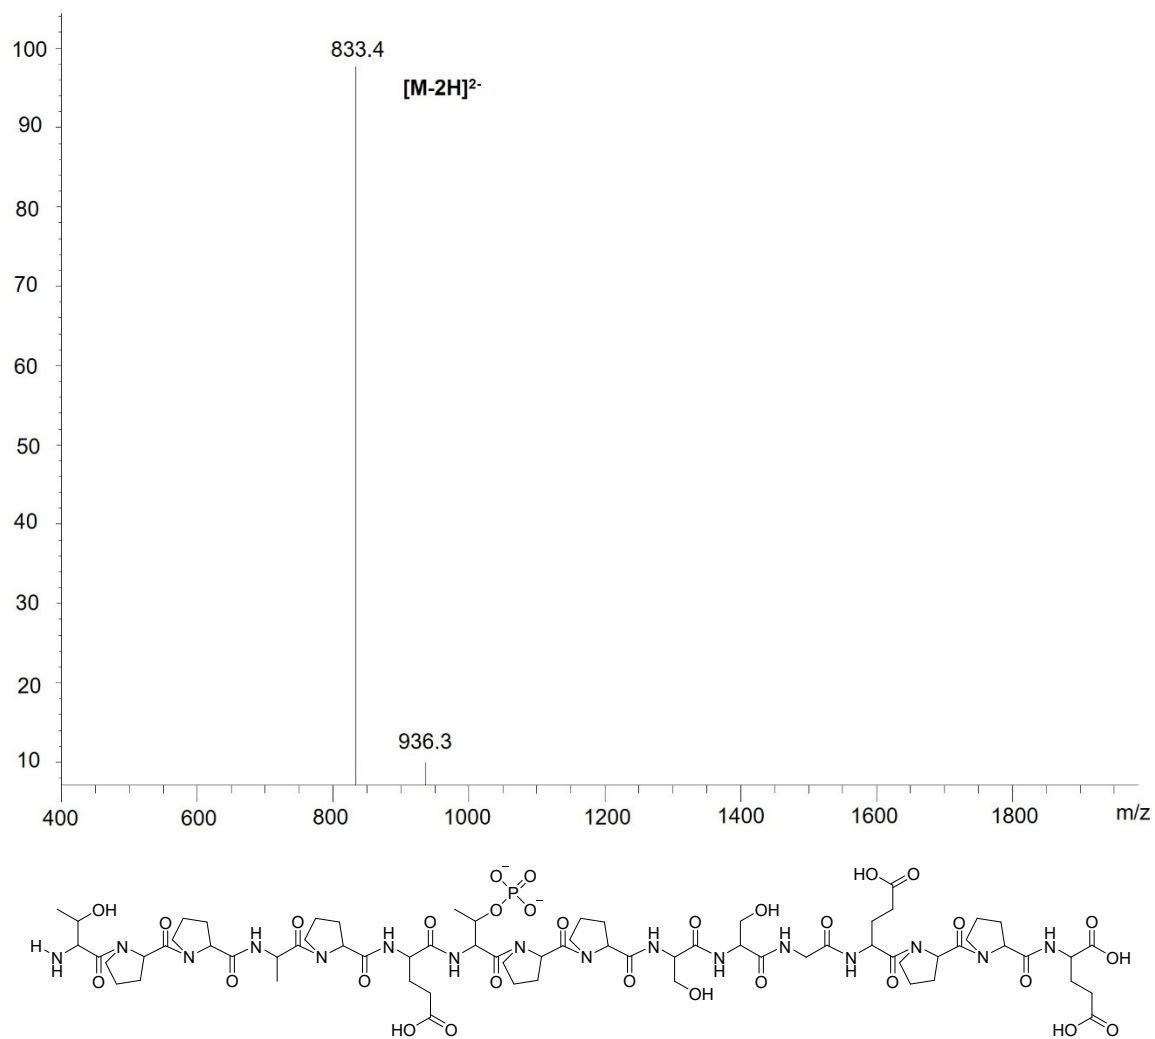

**Figure S61.** Mass spectrometry of the peptide TPPAPE(T-p)PPSSGEPPE. (termed ET-p). m/z: 1669.63 (100.0%). MS (ESI) m/z:  $[M-2H]^{2-}$  calcd, 833.82; found, 833.40.

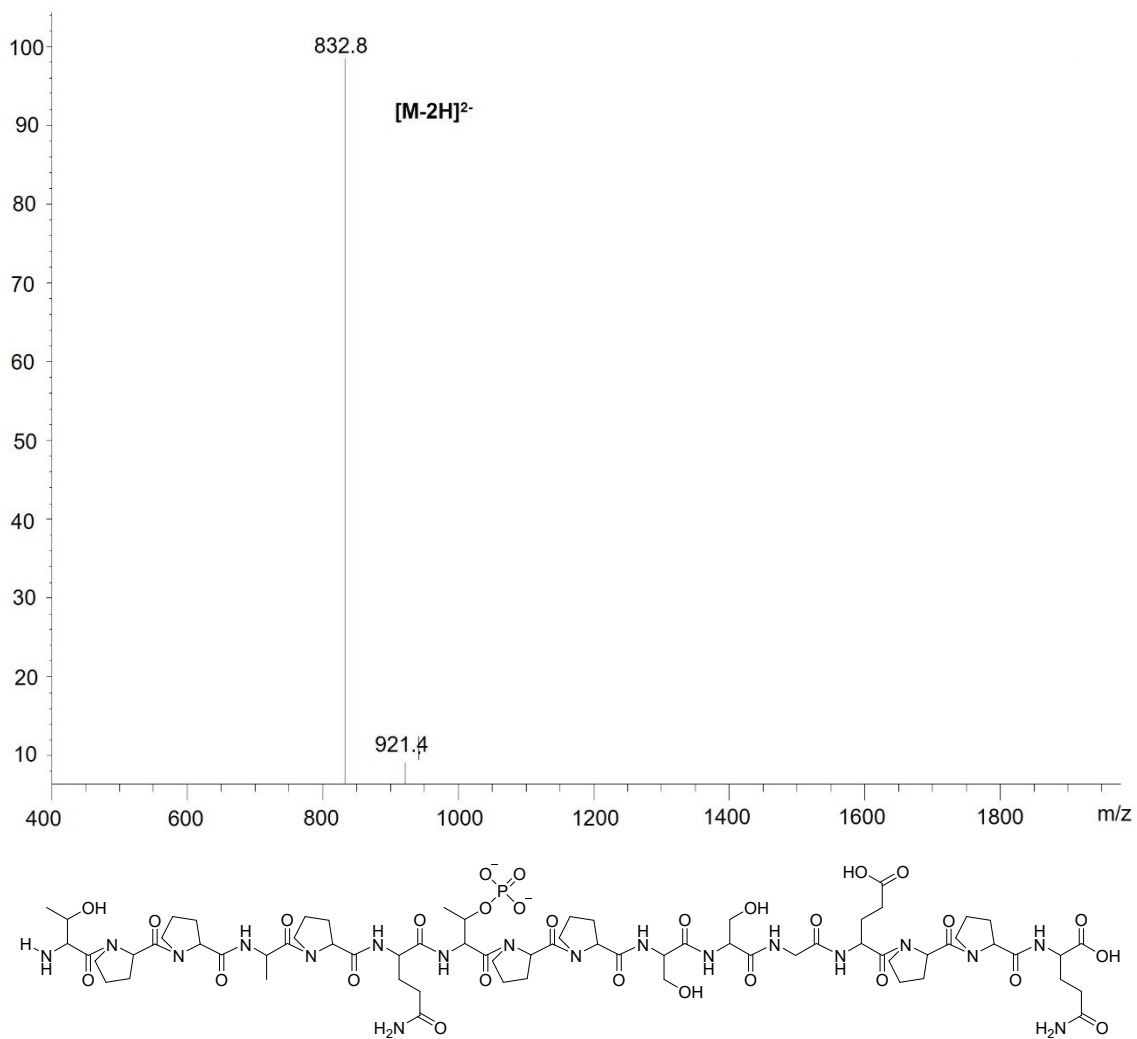

**Figure S62.** Mass spectrometry of the peptide TPPAPQ(T-p)PPSSGEPPQ (termed QT-p).  $m/z$ : 1667.66 (100.0%). MS (ESI)  $m/z$ :  $[M-2H]^{2-}$  calcd, 832.83; found, 832.80.

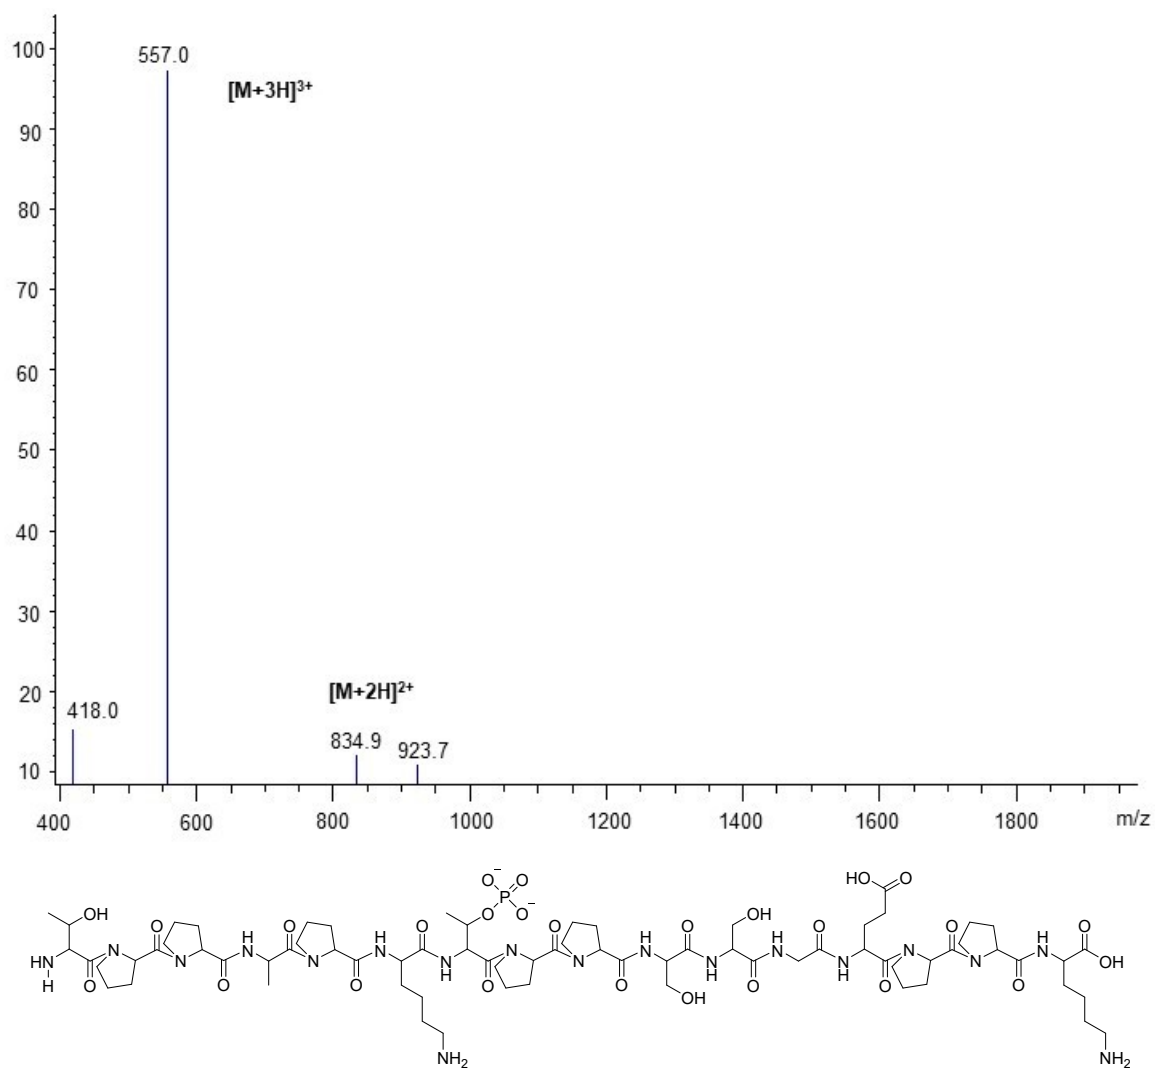

**Figure S63.** Mass spectrometry of the peptide TPPAPK(T-p)PPSSGEPPK (termed KT-p). m/z: 1667.75 (100.0%). MS (ESI) m/z:  $[M+2H]^{2+}$  calcd, 834.88; found, 834.90.  $[M+3H]^{3+}$  calcd, 556.92; found, 557.00.

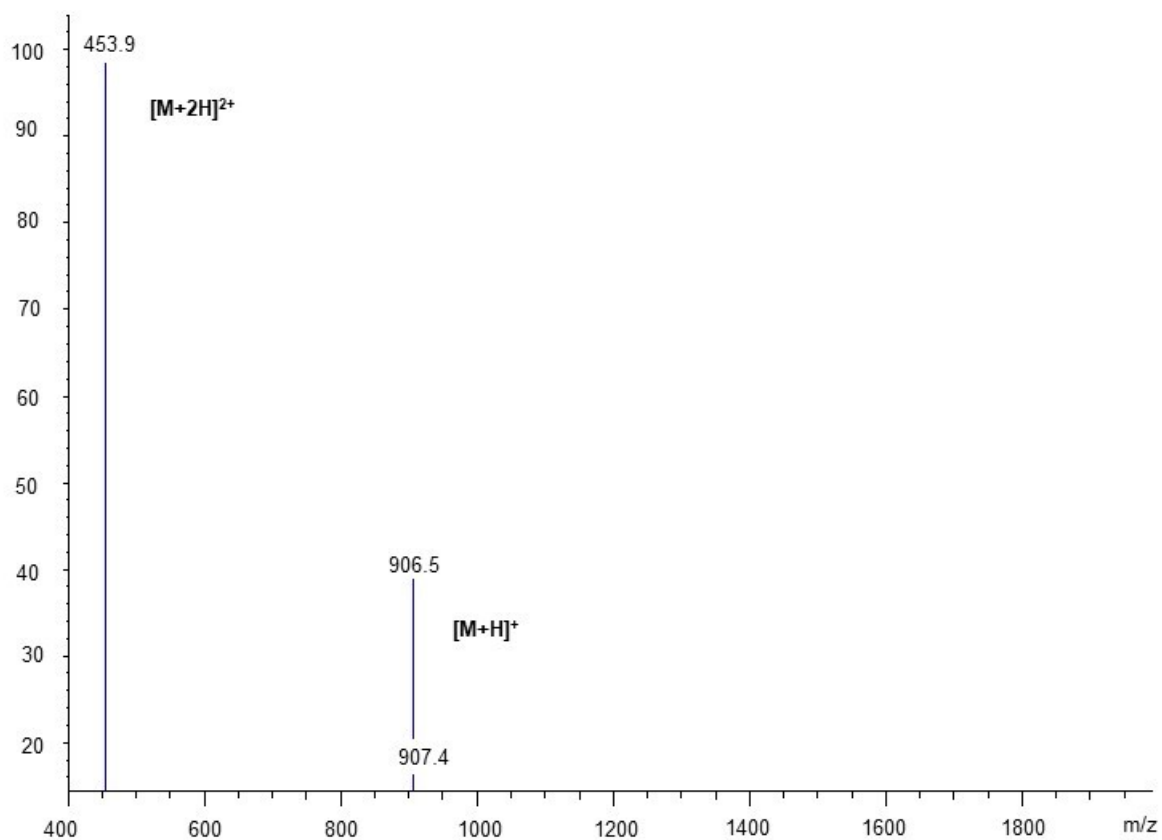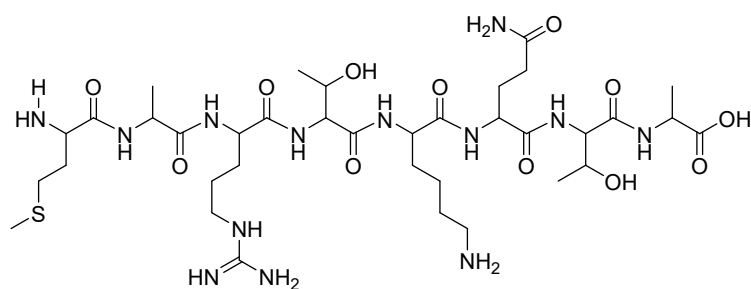

**Figure S64.** Mass spectrometry of the peptide MARTKQTA (termed MA). m/z: 906.06 (100.0%). MS (ESI) m/z:  $[M+H]^+$  calcd, 907.50; found, 906.50.  $[M+2H]^{2+}$  calcd, 454.03; found, 453.90.

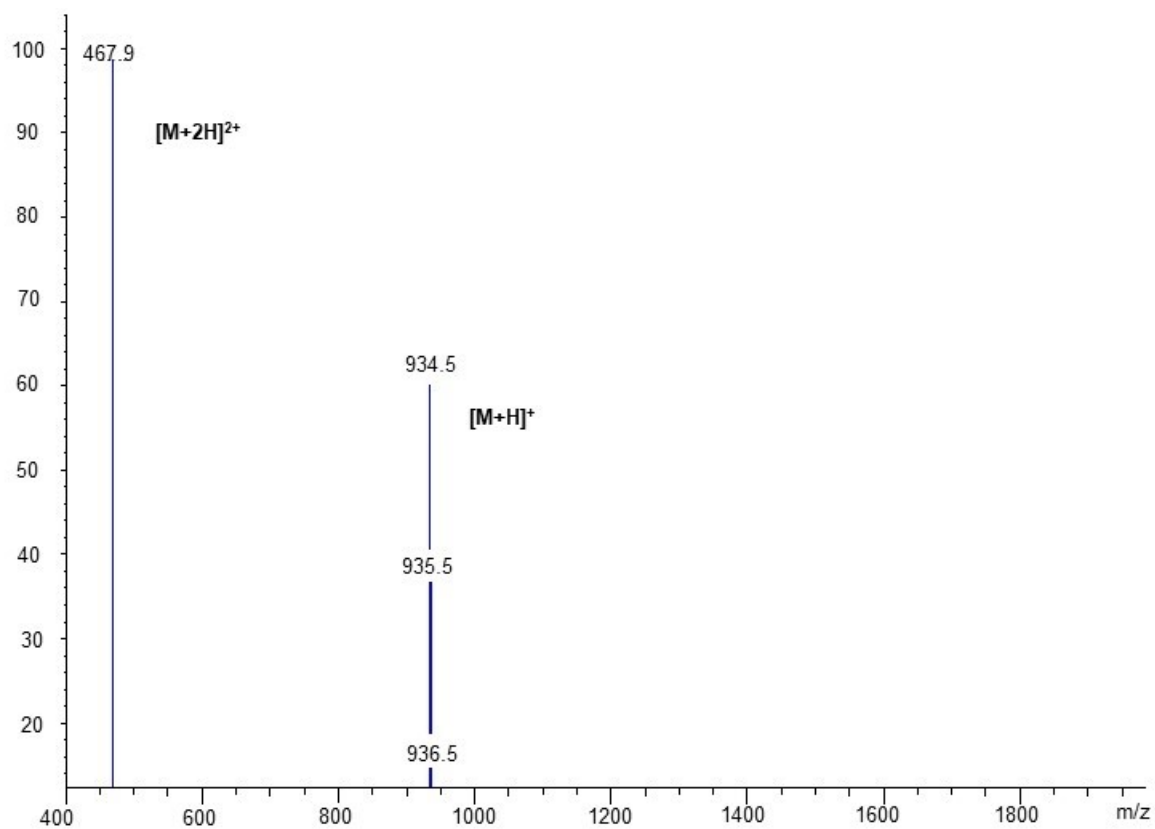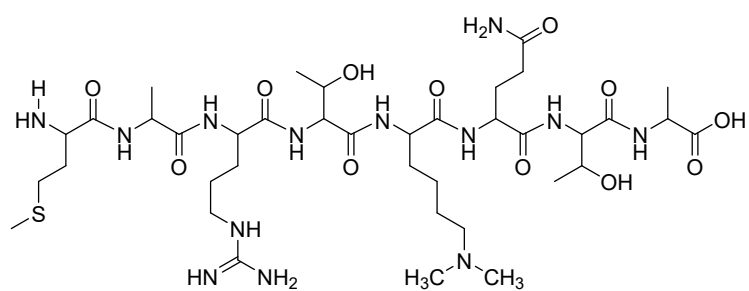

**Figure S65.** Mass spectrometry of the peptide MART(K-Me)QTA (termed MA-Me). m/z: 934.06 (100.0%). MS (ESI) m/z:  $[M+H]^+$  calcd, 935.06; found, 934.50.  $[M+2H]^{2+}$  calcd, 468.03; found, 467.90.

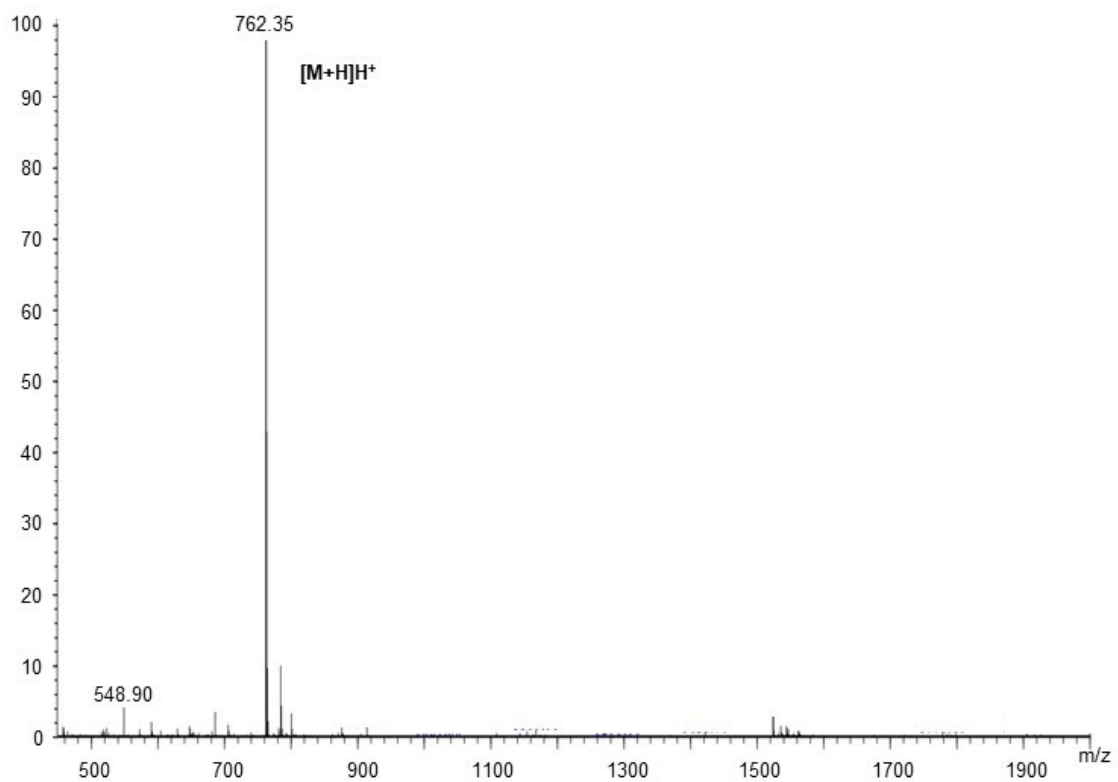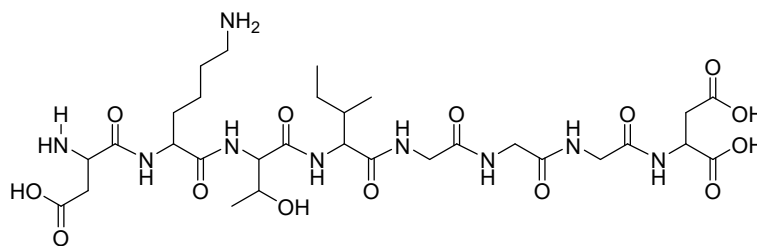

**Figure S66.** Mass spectrometry of the peptide DKTIGGGD (termed DK). m/z: 761.77 (100.0%). MS (ESI) m/z:  $[M+H]^+$  calcd, 762.77; found, 762.35.

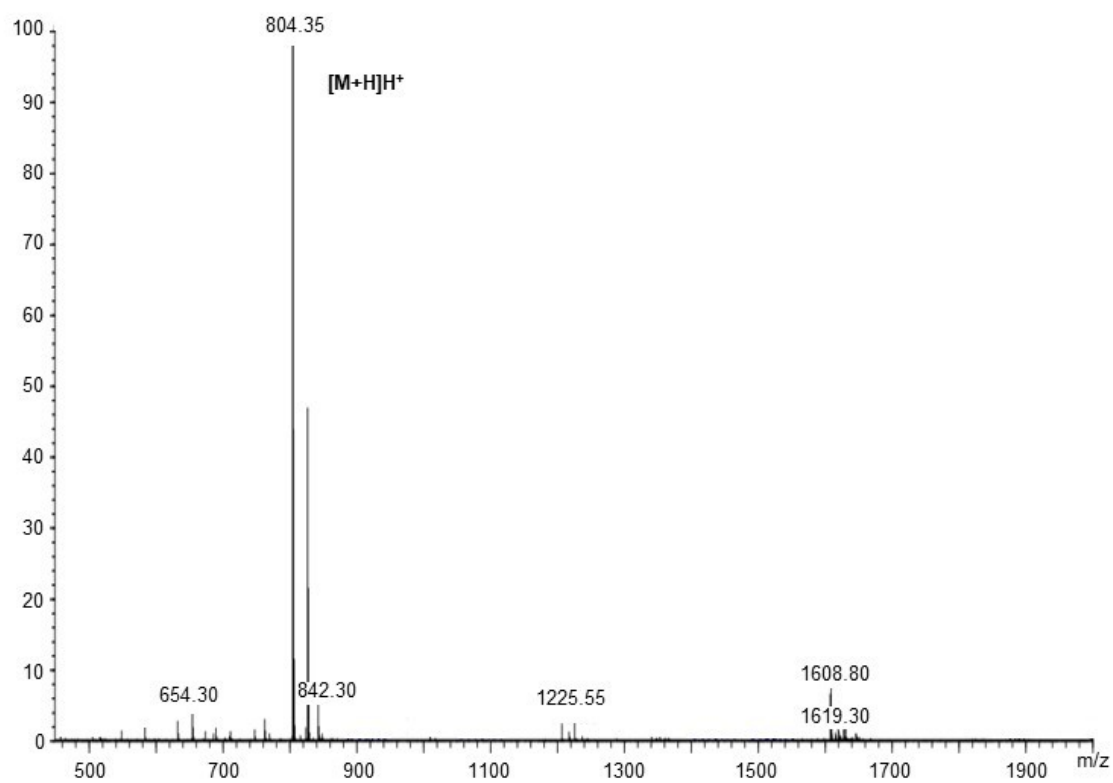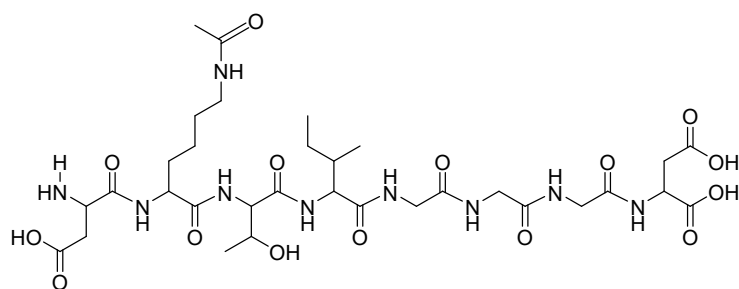

**Figure S67.** Mass spectrometry of the peptide D(K-Ac)TIGGGD (termed DK-Ac). m/z: 803.81 (100.0%). MS (ESI) m/z: [M+H]<sup>+</sup> calcd, 804.81; found, 804.35.

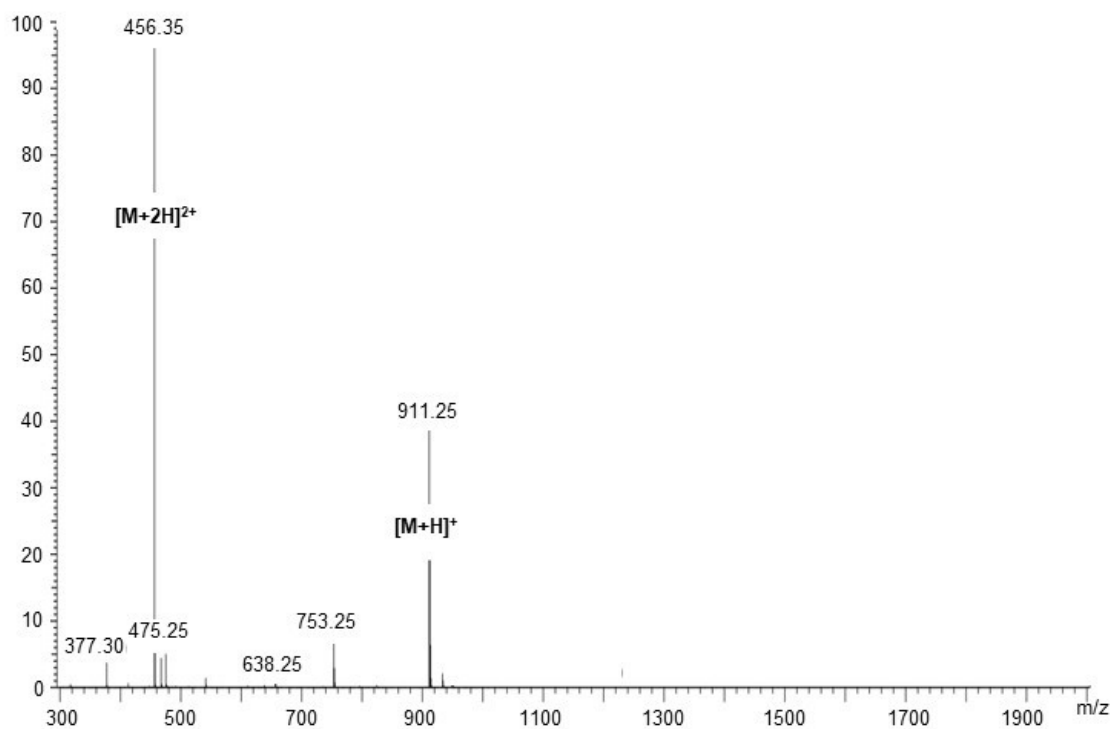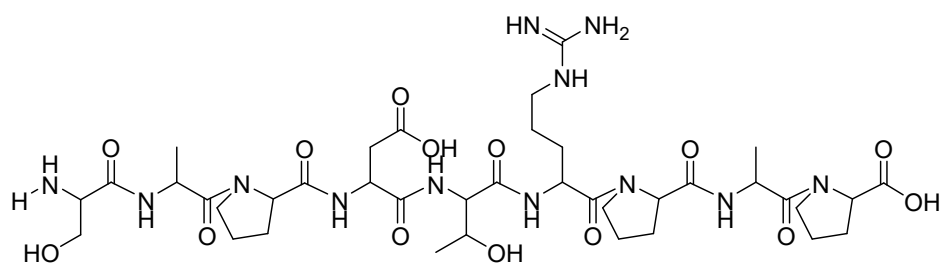

**Figure S68.** Mass spectrometry of the peptide SAPDTRPAP (termed ST). m/z: 910.95 (100.0%). MS (ESI) m/z: [M+H]<sup>+</sup> calcd, 911.95; found, 911.25. [M+2H]<sup>2+</sup> calcd, 456.48; found, 456.35.

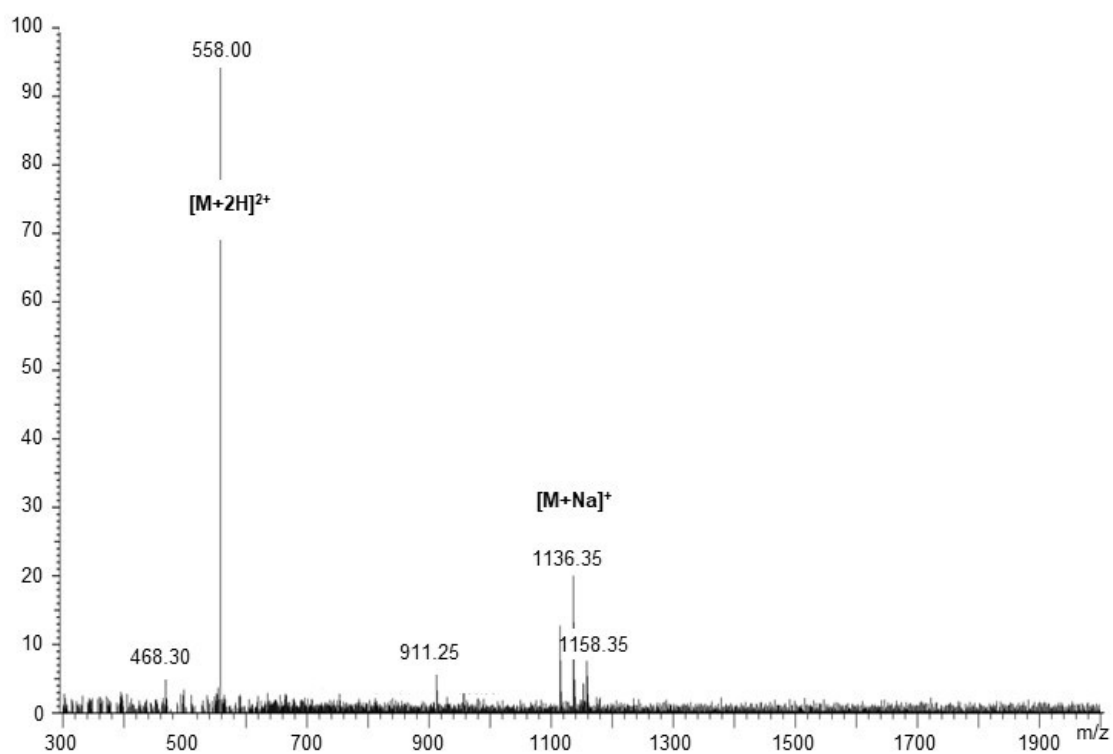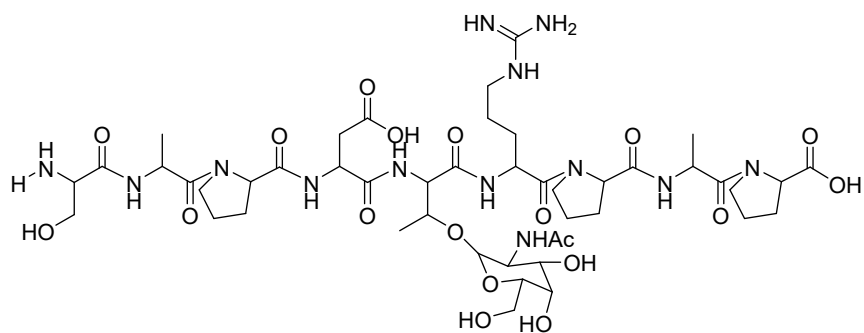

**Figure S69.** Mass spectrometry of the peptide SAPD(T- $\alpha$ -D-GalNAc)RPAP (termed ST- GalNAc). m/z: 1114.21 (100.0%). MS (ESI) m/z: [M+Na]<sup>+</sup> calcd, 1137.20; found, 1136.35. [M+2H]<sup>2+</sup> calcd, 558.11; found, 558.00.

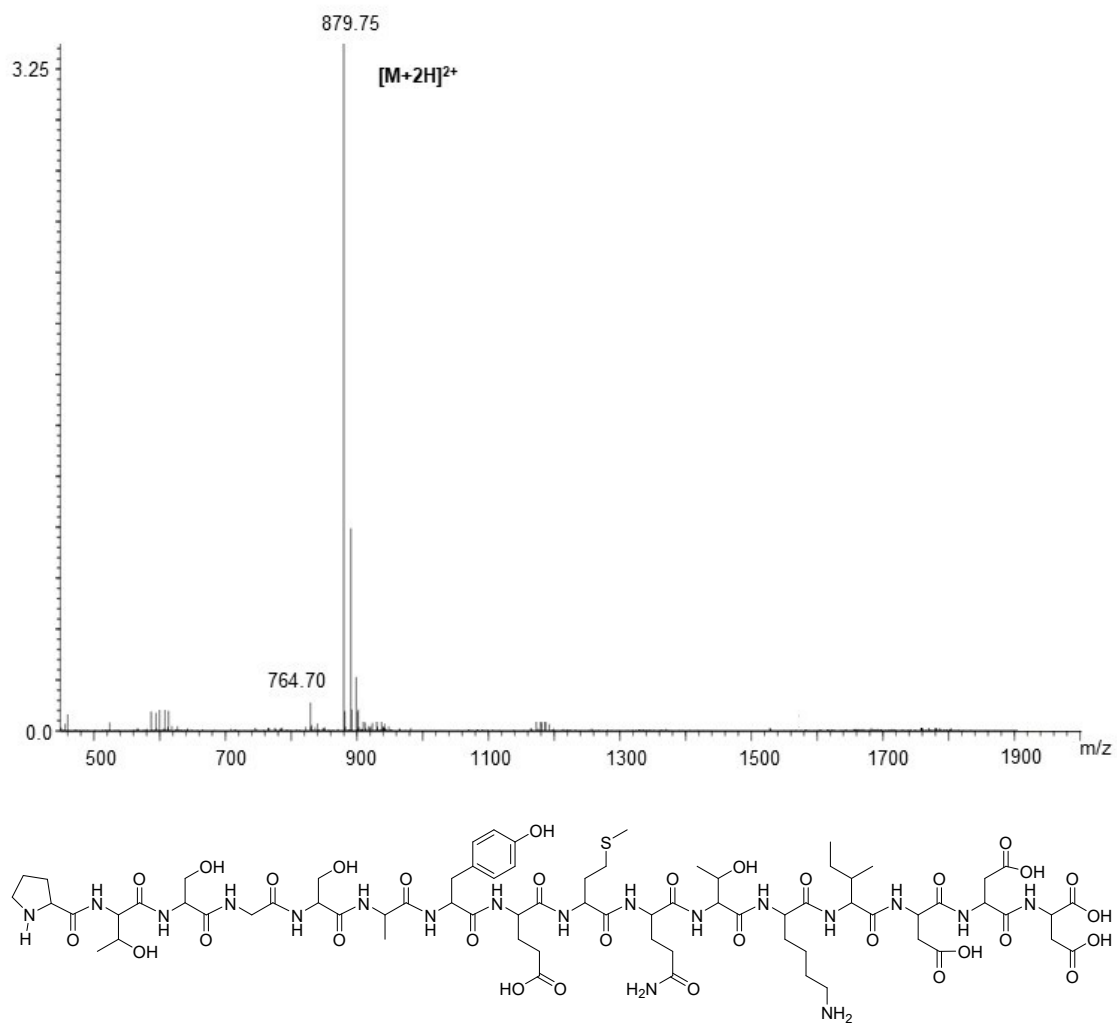

**Figure S70.** Mass spectrometry of the peptide PTSGSAYEMQTKIDDD (termed PD). m/z: 1757.82 (100.0%). MS (ESI) m/z:  $[M+2H]^{2+}$  calcd, 879.91; found, 879.75.





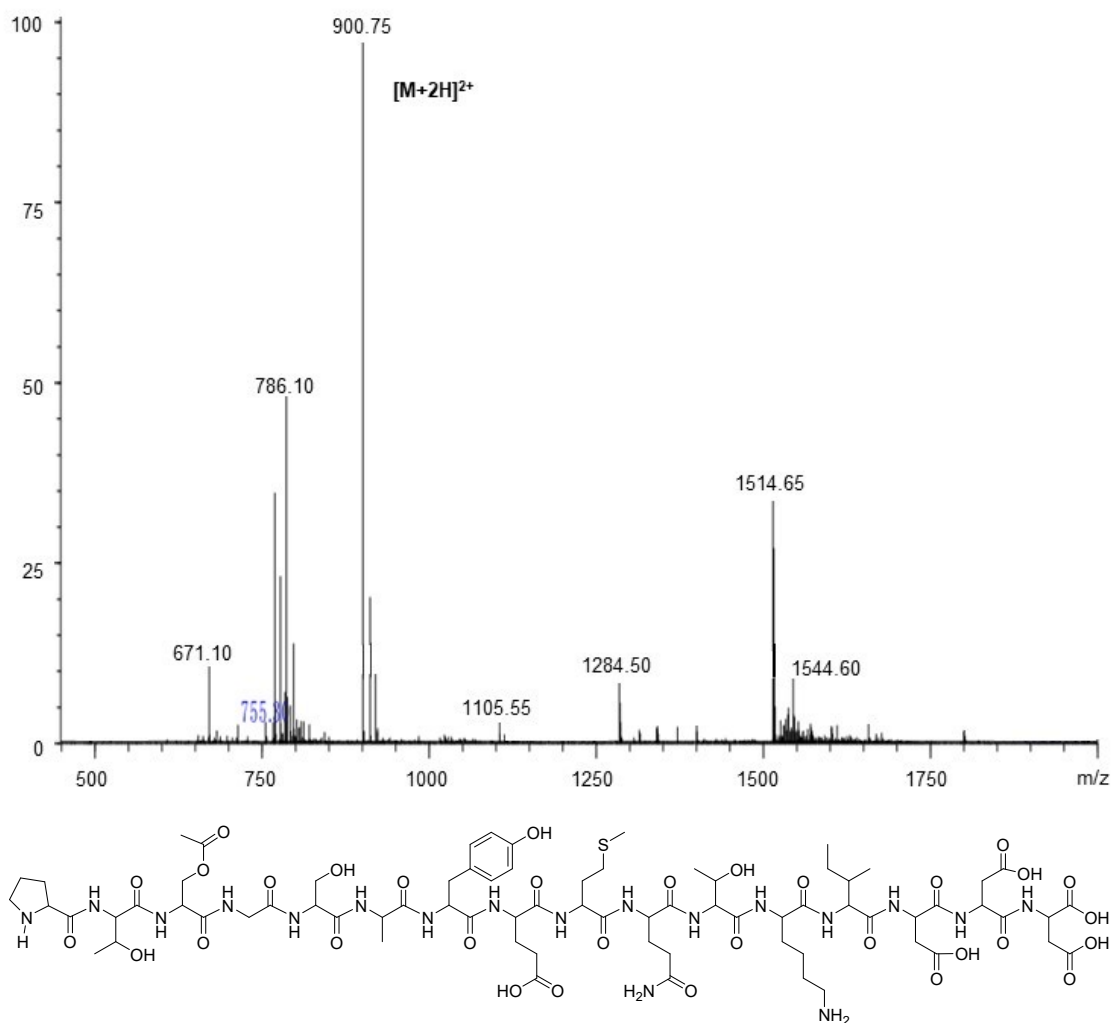

**Figure S73.** Mass spectrometry of the peptide PT(S-Ac)GSAYEMQTKIDDD (termed PD-Ac). m/z: 1799.86 (100.0%). MS (ESI) m/z:  $[M+2H]^{2+}$  calcd, 900.93; found, 900.75.

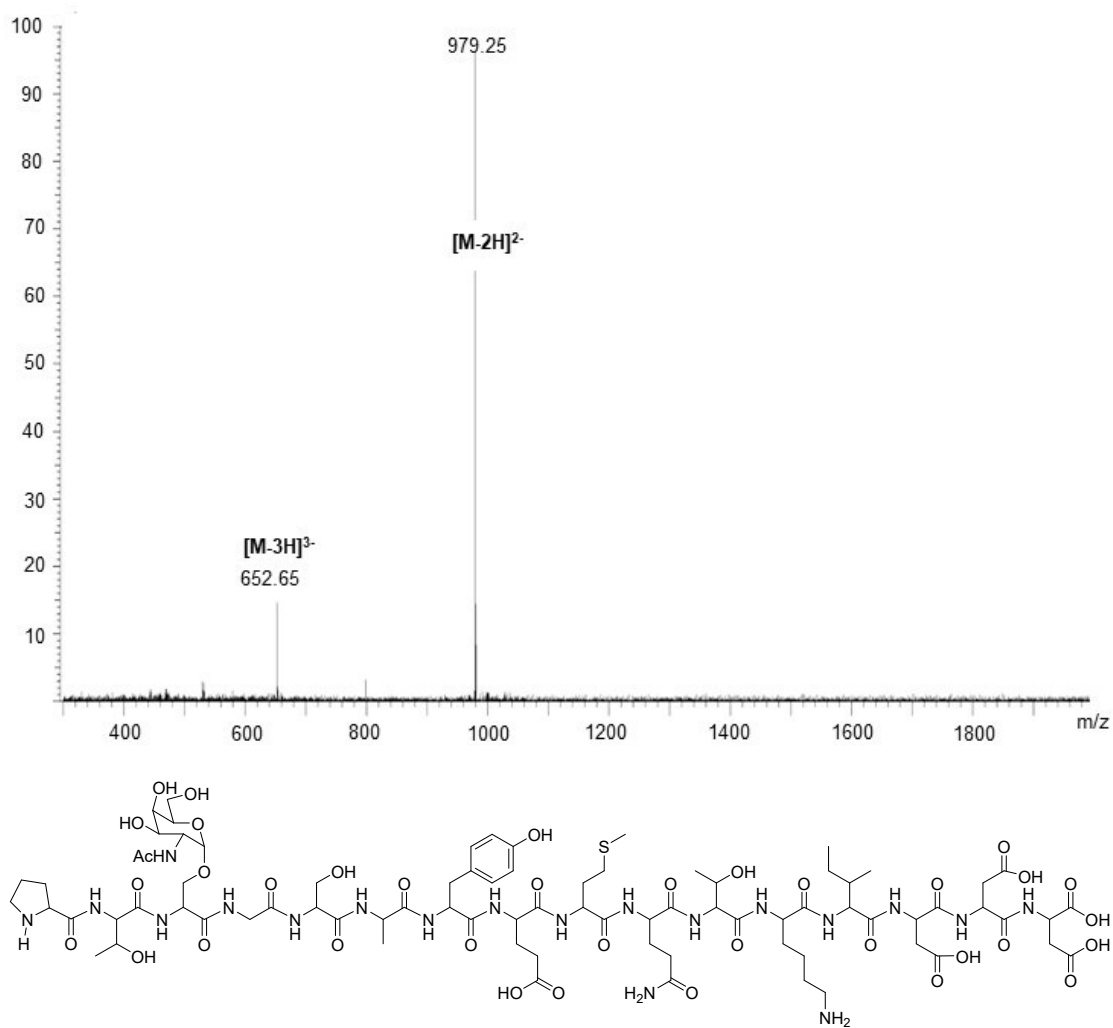

**Figure S74.** Mass spectrometry of the peptide PT(S-α-D-GalNAc)GSAYEMQTKIDDD (termed PD-GalNAc). m/z: 1961.02 (100.0%). MS (ESI) m/z: [M-2H]<sup>2-</sup> calcd, 979.51; found, 979.25. [M-3H]<sup>3-</sup> calcd, 652.67; found, 652.65.



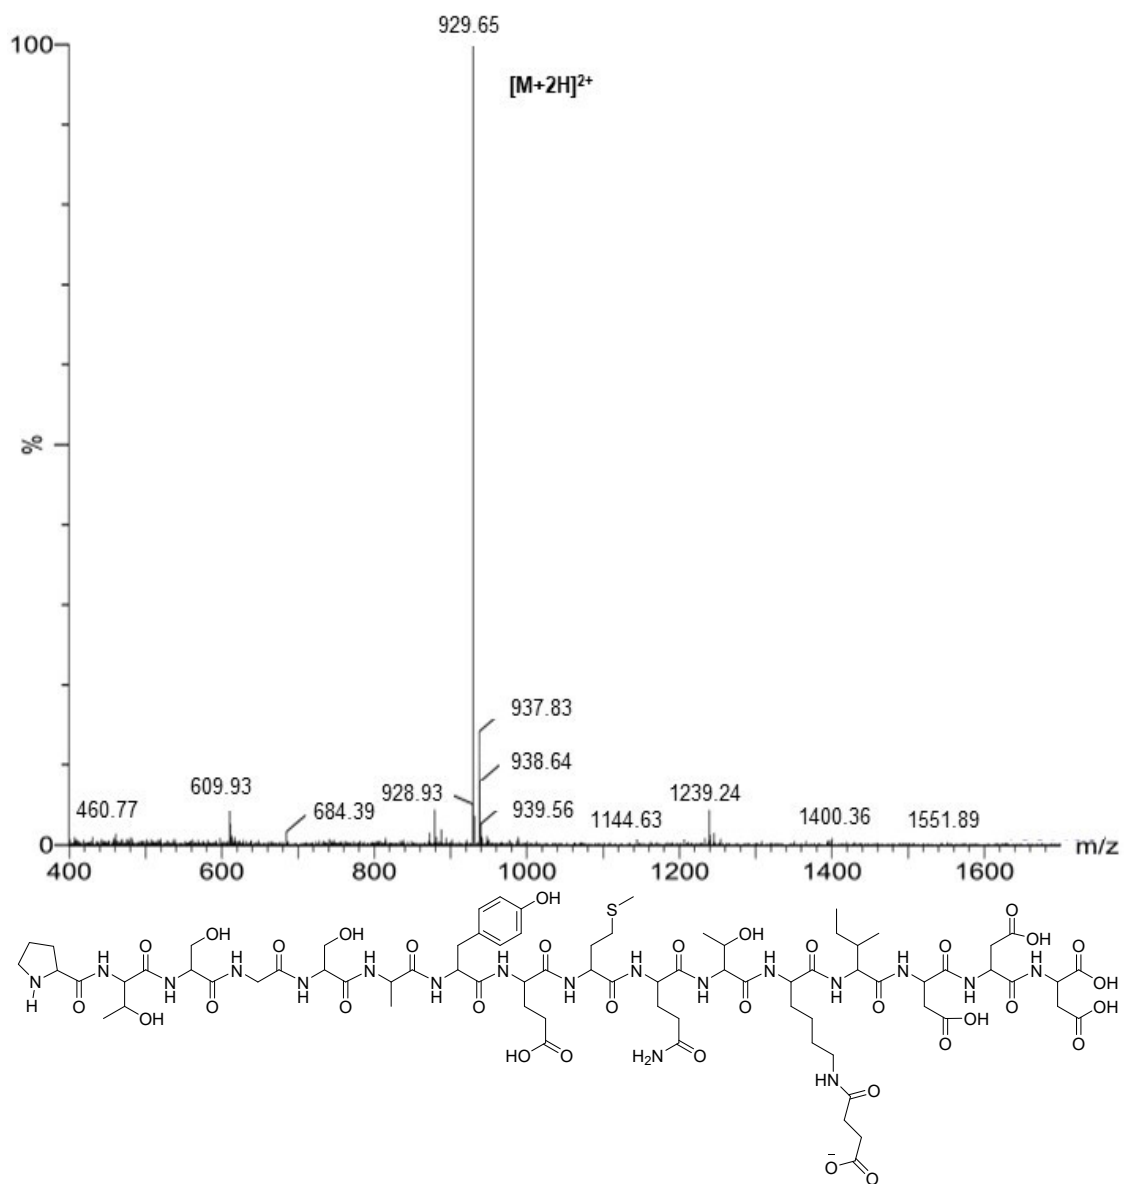

**Figure S76.** Mass spectrometry of the peptide PTSGSAYEMQT(K-succ)IDDD (termed PD-succ). m/z: 1857.9 (100.0%). MS (ESI) m/z:  $[M+2H]^{2+}$  calcd, 929.95; found, 929.65.

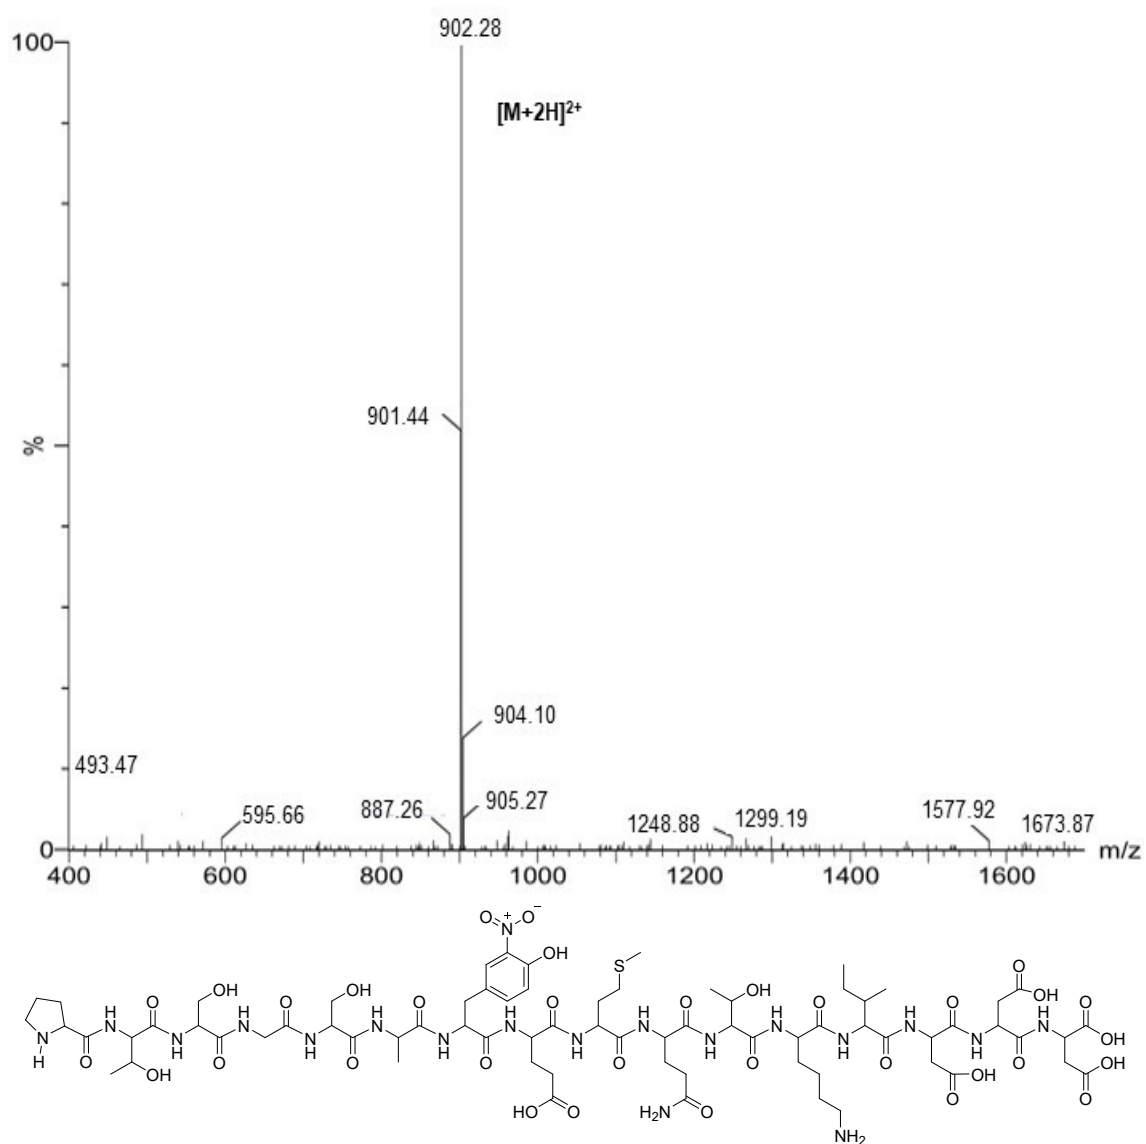

**Figure S77.** Mass spectrometry of the peptide PTSGSA(Y-n)EMQTKIDDD (termed PD-n). m/z: 1802.80 (100.0%). MS (ESI) m/z:  $[M+2H]^{2+}$  calcd, 902.40; found, 902.28.

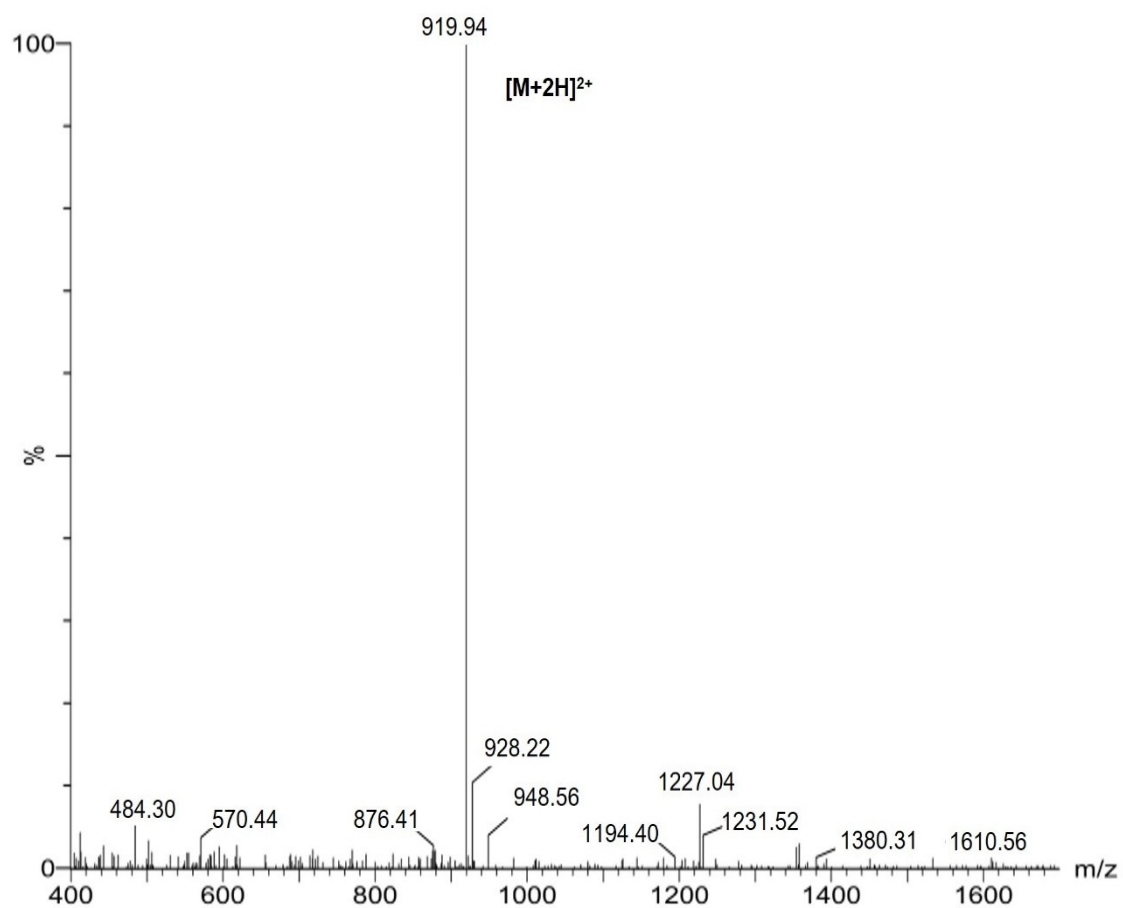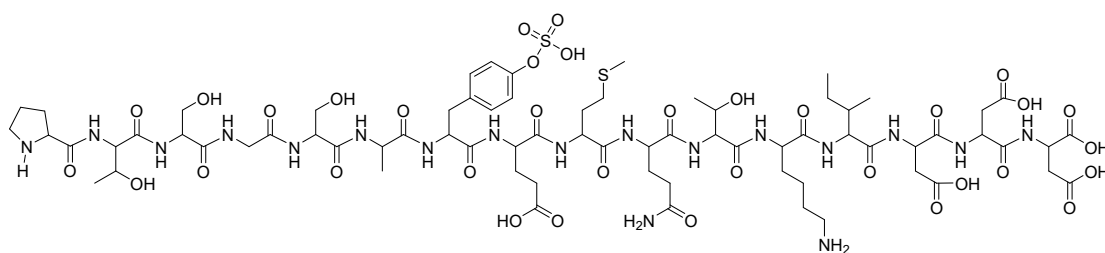

**Figure S78.** Mass spectrometry of the peptide PTSGSA(Y-s)EMQTKIDDD (termed PD-s). m/z: 1837.90 (100.0%). MS (ESI) m/z:  $[M+2H]^{2+}$  calcd, 919.95; found, 919.94.

## References

1. S. Wang, J. Cao, W. D. Jia, W. M. Guo, S. H. Yan, Y. Q. Wang, P. K. Zhang, H. Y. Chen, S. Huang, *Chem. Sci.* 2020, 11, 879-887.
2. M. J. Abraham, T. Murtola, R. Schulz, S. Páll, J. C. Smith, B. Hess and E. Lindahl, *SoftwareX* 2015, 1-2, 19-25.
3. M. Faller, M. Niederweis and G. E. Schulz, *Science* 2004, 303, 1189-1192.
4. J. Lee, X. Cheng, S. Jo, A. D. MacKerell, J. B. Klauda and W. Im, *J. Chem. Theory. Comput.* 2016, 12, 405-413.
5. H. M. Berman, J. Westbrook, Z. Feng, G. Gilliland, T. N. Bhat, H. Weissig, I. N. Shindyalov and P. E. Bourne, *Nucleic Acids Res.* 2000, 28, 235-242.
6. J. B. Klauda, R. M. Venable, J. A. Freites, J. W. O'Connor, D. J. Tobias, C. Mondragon-Ramirez, I. Vorobyov, A. D. MacKerell, Jr. and R. W. Pastor, *J. Phys. Chem. B*, 2010, 114, 7830-7843.
7. K. Hart, N. Foloppe, C. M. Baker, E. J. Denning, L. Nilsson and A. D. MacKerell, Jr., *J. Chem. Theory. Comput.* 2012, 8, 348-362.
8. W. L. Jorgensen, J. Chandrasekhar, J. D. Madura, R. W. Impey and M. L. Klein, *J. Chem. Phys.* 1983, 79, 926-935.
9. N. Michaud-Agrawal, E. J. Denning, T. B. Woolf and O. Beckstein, *J. Comput. Chem.* 2011, 32, 2319-2327.
10. B. R. Miller, III, T. D. McGee, Jr., J. M. Swails, N. Homeyer, H. Gohlke and A. E. Roitberg, *J. Chem. Theory. Comput.* 2012, 8, 3314-3321..
11. E. C. Meng, T. D. Goddard, E. F. Pettersen, G. S. Couch, Z. J. Pearson, J. H. Morris and T. E. Ferrin, *Protein Sci.* 2023, 32, e4792.
12. A. Aksimentiev and K. Schulten, *Biophys. J.* 2005,88, 3745-3761.
